# Supplementary material for: Design and Synthesis of Conformationally Flexible Scaffold as Bitopic Ligands for Potent D3-Selective Antagonists
Source: MDPI journal article supplement (doi:10.3390/ijms24010432), 2022-12-27

## Supplementary materials

### Index

|                                                      |     |
|------------------------------------------------------|-----|
| 1. Supplemental Table 1.....                         | S3  |
| 2. Supplemental Table 2.....                         | S4  |
| 3. Supplemental Table 3.....                         | S6  |
| 4. Analyses of HRMS.....                             | S8  |
| 5. $^1\text{H}$ or $^{13}\text{C}$ NMR spectra ..... | S21 |

### Supplemental Table 1. UPLC purity of investigated compounds

Condition: Mobile phase: A: 0.1% Formic acid, B: Acetonitrile.

Stationary phase: waters acquity UPLC® HSS 1.8  $\mu$ m C18 (2.1  $\times$  50 mm)

(1) 95% to 1% of A in B for 3.3 min, 1% of A in B for 0.55 min, 1% to 95% of A in B for 0.05 min, and 95% of A in B for 0.1 min. Flow rate: 0.75 mL/ min for **6a-d**, **9b**, **11a-b**, **12**, **20a-c**, **21d**, and **21g-h**.

(2) 95% of A in B for 0.5 min, 95% to 10% of A in B for 2 min, 10% of A in B for 0.5 min, 10% to 95% of A in B for 0.1 min, and 95% of A in B for 0.4 min. Flow rate: 0.5 mL/ min for **9a**, **14**, **21a-c**, **21e-f**, and **21i-j**.

| Name       | Purity (%)   | Name       | Purity (%)   | Name       | Purity (%)   |
|------------|--------------|------------|--------------|------------|--------------|
| <b>6a</b>  | <b>99.0%</b> | <b>12</b>  | <b>95.4%</b> | <b>21d</b> | <b>97.2%</b> |
| <b>6b</b>  | <b>95.8%</b> | <b>24</b>  | <b>95.1%</b> | <b>21e</b> | <b>95.1%</b> |
| <b>6c</b>  | <b>99.5%</b> | <b>20a</b> | <b>98.8%</b> | <b>21f</b> | <b>96.2%</b> |
| <b>6d</b>  | <b>98.8%</b> | <b>20b</b> | <b>96.1%</b> | <b>21g</b> | <b>95.3%</b> |
| <b>9a</b>  | <b>98.5%</b> | <b>20c</b> | <b>95.8%</b> | <b>21h</b> | <b>96.2%</b> |
| <b>9b</b>  | <b>97.6%</b> | <b>21a</b> | <b>98.0%</b> | <b>21i</b> | <b>97.0%</b> |
| <b>11a</b> | <b>95.8%</b> | <b>21b</b> | <b>98.9%</b> | <b>21j</b> | <b>95.4%</b> |
| <b>11b</b> | <b>96.7%</b> | <b>21c</b> | <b>97.5%</b> |            |              |

**Supplemental Table 2. Binding profiles of potential candidates for other GPCRs<sup>a</sup>**

| GPCRs      |                     | K <sub>i</sub> (nM) <sup>b</sup> or % inhibition at 10 μM <sup>c</sup> |      |                  |         |         |      |      |         |         |
|------------|---------------------|------------------------------------------------------------------------|------|------------------|---------|---------|------|------|---------|---------|
|            |                     | 9a                                                                     | 20a  | 21a              | 21c     | 21d     | 21e  | 21g  | 21i     | 21j     |
| Serotonin  | 5-HT <sub>1A</sub>  | 1741                                                                   | 194  | 971              | 509     | 692     | 575  | 3312 | 245     | 961     |
|            | 5-HT <sub>1B</sub>  | 905                                                                    | 1052 | N/A <sup>d</sup> | N/A     | N/A     | N/A  | 1056 | N/A     | N/A     |
|            | 5-HT <sub>1D</sub>  | 1006                                                                   | 449  | 1204             | 1150    | 1655    | N/A  | 1825 | 3137    | 1932    |
|            | 5-HT <sub>1E</sub>  | N/A                                                                    | N/A  | N/A              | N/A     | N/A     | N/A  | N/A  | N/A     | N/A     |
|            | 5-HT <sub>2A</sub>  | 222                                                                    | 617  | 1244             | 727     | 844     | 1328 | 276  | 1368    | 3141    |
|            | 5-HT <sub>2B</sub>  | 187                                                                    | 170  | 118              | 157     | 181     | 443  | 189  | 269     | 183     |
|            | 5-HT <sub>2C</sub>  | 577                                                                    | 2021 | 1326             | 1496    | 2105    | 5782 | 354  | 9727    | 5057    |
|            | 5-HT <sub>3</sub>   | 195                                                                    | 103  | 53               | 58      | 92      | 148  | 195  | 29      | 246     |
|            | 5-HT <sub>5A</sub>  | N/A                                                                    | N/A  | N/A              | N/A     | N/A     | N/A  | N/A  | N/A     | N/A     |
|            | 5-HT <sub>6</sub>   | 287                                                                    | 258  | 730              | 1857    | 1626    | 2333 | 363  | 2157    | 1314    |
|            | 5-HT <sub>7A</sub>  | N/A                                                                    | N/A  | N/A              | N/A     | N/A     | N/A  | 2247 | N/A     | N/A     |
| Adrenergic | alpha <sub>1A</sub> | N/A                                                                    | 2209 | N/A              | N/A     | N/A     | N/A  | 2114 | N/A     | N/A     |
|            | alpha <sub>1B</sub> | 2190                                                                   | 1400 | 3938             | N/A     | >10,000 | N/A  | 1635 | N/A     | N/A     |
|            | alpha <sub>1D</sub> | 2556                                                                   | 2416 | N/A              | N/A     | 7311    | N/A  | 1407 | N/A     | N/A     |
|            | alpha <sub>2A</sub> | 1346                                                                   | 740  | 1967             | 2584    | 2141    | 5573 | 1161 | 3336    | 3114    |
|            | alpha <sub>2B</sub> | 235                                                                    | 672  | 577              | 909     | 386     | 2835 | 571  | 2949    | 646     |
|            | alpha <sub>2C</sub> | 313                                                                    | 113  | 195              | 524     | 532     | 1761 | 78   | 1291    | 183     |
|            | beta <sub>1</sub>   | 5897                                                                   | 3713 | N/A              | N/A     | N/A     | 6518 | 1891 | N/A     | N/A     |
|            | beta <sub>2</sub>   | 669                                                                    | 5834 | N/A              | N/A     | N/A     | N/A  | 616  | N/A     | >10,000 |
|            | beta <sub>3</sub>   | 1496                                                                   | 1386 | 4527             | N/A     | N/A     | 5565 | 2958 | >10,000 | 4359    |
| Dopamine   | D <sub>1</sub>      | 2402                                                                   | 4292 | N/A              | N/A     | N/A     | N/A  | 2007 | N/A     | N/A     |
|            | D <sub>2</sub>      | 232                                                                    | 185  | 216              | 74      | 89      | N/A  | 170  | 40      | 76      |
|            | D <sub>3</sub>      | 0.83                                                                   | 1.32 | 0.19             | 0.36    | 0.25    | 0.46 | 0.61 | 0.28    | 0.34    |
|            | D <sub>4</sub>      | 579                                                                    | 938  | 377              | 2183    | 239     | N/A  | 582  | 514     | 878     |
|            | D <sub>5</sub>      | 1467                                                                   | N/A  | N/A              | >10,000 | N/A     | N/A  | 8692 | N/A     | N/A     |
| Opioid     | MOR                 | 1556                                                                   | 3020 | 1076             | N/A     | 2405    | N/A  | 2156 | N/A     | 2771    |

|                                   |                    |      |      |      |      |         |      |      |      |      |
|-----------------------------------|--------------------|------|------|------|------|---------|------|------|------|------|
|                                   | KOR                | 107  | 116  | N/A  | 642  | 2326    | N/A  | 170  | N/A  | N/A  |
|                                   | DOR                | N/A  | N/A  | N/A  | N/A  | N/A     | N/A  | N/A  | N/A  | N/A  |
| Histamine                         | H <sub>1</sub>     | 1492 | 1357 | 1508 | 591  | 0.95    | 675  | 102  | 84   | 1465 |
|                                   | H <sub>2</sub>     | 2614 | 1650 | 2793 | N/A  | N/A     | N/A  | 2478 | N/A  | 3683 |
|                                   | H <sub>3</sub>     | 5580 | N/A  | N/A  | 4725 | >10,000 | N/A  | 4812 | N/A  | N/A  |
|                                   | H <sub>4</sub>     | 6425 | 3462 | N/A  | N/A  | N/A     | N/A  | N/A  | N/A  | N/A  |
| Muscarinic                        | M <sub>1</sub>     | 2355 | N/A  | N/A  | 3392 | >10,000 | N/A  | 3432 | N/A  | N/A  |
|                                   | M <sub>2</sub>     | 1205 | 4931 | N/A  | 1657 | N/A     | 9441 | N/A  | N/A  | 2968 |
|                                   | M <sub>3</sub>     | 4750 | N/A  | 1264 | N/A  | N/A     | 1547 | N/A  | N/A  | N/A  |
|                                   | M <sub>4</sub>     | 1602 | N/A  | N/A  | 930  | N/A     | N/A  | 1094 | N/A  | N/A  |
|                                   | M <sub>5</sub>     | 5038 | N/A  | N/A  | 2388 | 4223    | N/A  | N/A  | N/A  | N/A  |
| Sigma                             | sigma <sub>1</sub> | 473  | 522  | 241  | N/A  | 293     | N/A  | 694  | 381  | 204  |
|                                   | sigma <sub>2</sub> | 391  | 1149 | 1774 | N/A  | >10,000 | N/A  | 1543 | 992  | 1491 |
| BZP Rat Brain Site                |                    | N/A  | N/A  | N/A  | N/A  | N/A     | N/A  | N/A  | N/A  | N/A  |
| GABA <sub>A</sub>                 |                    | N/A  | N/A  | N/A  | N/A  | N/A     | N/A  | N/A  | N/A  | N/A  |
| Dopamine active transporter (DAT) |                    | 87   | 511  | 89   | 57   | 90      | N/A  | 100  | 289  | 390  |
| Norepinephrine transporter (NET)  |                    | 772  | 3514 | 391  | N/A  | 842     | N/A  | 1940 | 3198 | 1104 |
| Serotonin transporter (SERT)      |                    | N/A  | 5845 | 3009 | N/A  | N/A     | N/A  | N/A  | N/A  | 415  |
| Benzodiazepine receptor (PBR)     |                    | 1454 | 9    | 9    | N/A  | 1220    | 11   | 6    | N/A  | 8    |

<sup>a</sup>All compounds were converted to HCl salts prior to tests. <sup>b</sup>K<sub>i</sub> values were determined by at least three experiments.

<sup>c</sup>% of inhibition was measured using 10 μM of each compound. <sup>d</sup>N/A; not active means less than 50% inhibition that was obtained in primary binding assay at 10 μM of the compound.

**Supplemental Table 3. List of reagents and solvents**

|          | Name                                                 | Formula                         | Purity        | Purchased from    |
|----------|------------------------------------------------------|---------------------------------|---------------|-------------------|
| Reagents | HBTU                                                 | $C_{11}H_{16}F_6N_5OP$          | 97%           | Matrix Scientific |
|          | DIPEA                                                | $C_8H_{19}N$                    | 98%           | Advanced chemtech |
|          | TFA                                                  | $CF_3COOH$                      | 99%           | Sigma-Aldrich     |
|          | Sodium carbonate                                     | $Na_2CO_3$                      | $\geq 99.5\%$ | Sigma-Aldrich     |
|          | Dimethylamine                                        | $(CH_3)_2NH$                    | 2 M in THF    | Sigma-Aldrich     |
|          | Sodium triacetoxyborohydride                         | $(CH_3COO)_3BNa$                | 97%           | Sigma-Aldrich     |
|          | <i>N</i> -(3-Bromopropyl) phthalimide                | $C_{11}H_{10}BrNO_2$            | 98%           | Sigma-Aldrich     |
|          | <i>N</i> -(4-Bromobutyl) phthalimide                 | $C_{12}H_{12}BrNO_2$            | 98%           | Sigma-Aldrich     |
|          | Potassium carbonate                                  | $K_2CO_3$                       | 99%           | Fisher chemical   |
|          | Hydrazine hydrate                                    | $NH_2NH_2 \cdot H_2O$           | 50-60%        | Sigma-Aldrich     |
|          | Thionyl chloride                                     | $SOCl_2$                        | $\geq 99\%$   | Sigma-Aldrich     |
|          | 4-(Thiophen-2-yl)benzoic acid                        | $C_{11}H_8O_2S$                 | 97%           | Sigma-Aldrich     |
|          | Triethylamine (Et <sub>3</sub> N)                    | $(C_2H_5)_3N$                   | $\geq 99\%$   | Sigma-Aldrich     |
|          | Ammonia solution                                     | $NH_3$                          | 7 N in MeOH   | Sigma-Aldrich     |
|          | 4-methyl-5-phenyl-4 <i>H</i> -1,2,4-triazole-3-thiol | $C_9H_9N_3S$                    | 95%           | Chembridge        |
|          | Triphenylphosphine                                   | $PPh_3$                         | 99%           | Sigma-Aldrich     |
|          | DIAD                                                 | $(CH_3)_2CHOOCN=NCOOCH(CH_3)_2$ | 98%           | Sigma-Aldrich     |
|          | Iodomethane                                          | $CH_3I$                         | 99.5%         | Sigma-Aldrich     |
|          | 3-Bromopropylamine hydrobromide                      | $BrCH_2CH_2CH_2NH_2 \cdot HBr$  | 98%           | Sigma-Aldrich     |
|          | <i>N</i> -Methylethanamine                           | $C_2H_5NHCH_3$                  | 97%           | Sigma-Aldrich     |

|          |                                                              |                        |        |                    |
|----------|--------------------------------------------------------------|------------------------|--------|--------------------|
|          | Ethylenediamine                                              | $C_2H_8N_2$            | >98.0% | TCI                |
|          | Ethyl trifluoroacetate                                       | $C_4H_5F_3O_2$         | >99.0% | TCI                |
|          | Allyl bromide                                                | $CH_2=CHCH_2Br$        | 97%    | Sigma-Aldrich      |
|          | Di- <i>tert</i> -butyl dicarbonate<br>((Boc) <sub>2</sub> O) | $[(CH_3)_3COCO]_2O$    | >98.0% | Sigma-Aldrich      |
|          | 4-Fluorobenzaldehyde                                         | $FC_6H_4CHO$           | 98%    | Sigma-Aldrich      |
|          | 2-Naphthoyl chloride                                         | $C_{10}H_7COCl$        | 98%    | Sigma-Aldrich      |
|          | 4-Quinolinecarboxylic acid                                   | $C_{10}H_7NO_2$        | 97%    | Sigma-Aldrich      |
|          | 4-(4-Pyridyl)benzoic acid                                    | $C_{12}H_9NO_2$        | ≥99%   | Sigma-Aldrich      |
|          | Indole-2-carboxylic acid                                     | $C_9H_7NO_2$           | 98%    | Sigma-Aldrich      |
|          | Imidazo[1,2- <i>a</i> ]pyridine-2-<br>carboxylic acid        | $C_8H_6N_2O_2$         | 85%    | Sigma-Aldrich      |
|          | Isonicotinic acid                                            | $C_6H_5NO_2$           | 99%    | Sigma-Aldrich      |
|          | 4-(Thiophen-3-yl)benzoic<br>acid                             | $C_{11}H_8O_2S$        | 95%    | Ambeed             |
|          | 3-(Dimethylamino)benzoic<br>acid                             | $(CH_3)_2NC_6H_4CO_2H$ | ≥97%   | Sigma-Aldrich      |
|          | 3-Thiophenecarboxylic acid                                   | $C_5H_4O_2S$           | 99%    | Sigma-Aldrich      |
|          | 1-Methylindole-2-carboxylic<br>acid                          | $C_{10}H_9NO_2$        | 98%    | Sigma-Aldrich      |
| Solvents | DMF                                                          | $HCON(CH_3)_2$         | 99.8%  | Sigma-Aldrich      |
|          | Dichloromethane                                              | $CH_2Cl_2$             | ≥99.8% | Sigma-Aldrich      |
|          | MeCN                                                         | $CH_3CN$               | 99.8%  | Sigma-Aldrich      |
|          | THF                                                          | $C_4H_8O$              | ≥99.9% | Sigma-Aldrich      |
|          | Dichloroethane                                               | $ClCH_2CH_2Cl$         | 99.8%  | Acros organics     |
|          | EtOH                                                         | $CH_3CH_2OH$           | 100%   | Decon laboratories |
|          | Acetone                                                      | $CH_3COCH_3$           | ≥99.5% | Sigma-Aldrich      |
|          | MeOH                                                         | $CH_3OH$               | 99.8%  | Sigma-Aldrich      |

# **Analyses of HRMS**

## Compound: 6a

### Single Mass Analysis

Tolerance = 3.0 mDa / DBE: min = -1.5, max = 50.0

Element prediction: Off

Number of isotope peaks used for i-FIT = 2

Monoisotopic Mass, Even Electron Ions

989 formula(e) evaluated with 4 results within limits (up to 100 closest results for each mass)

Elements Used:

C: 0-52 H: 0-103 N: 0-3 O: 0-9 F: 1-3 <sup>23</sup>Na: 0-1

24-Nov-2019

HY\_1\_085 32 (0.941)

KIM  
1: TOF MS ES+  
3.89e+003

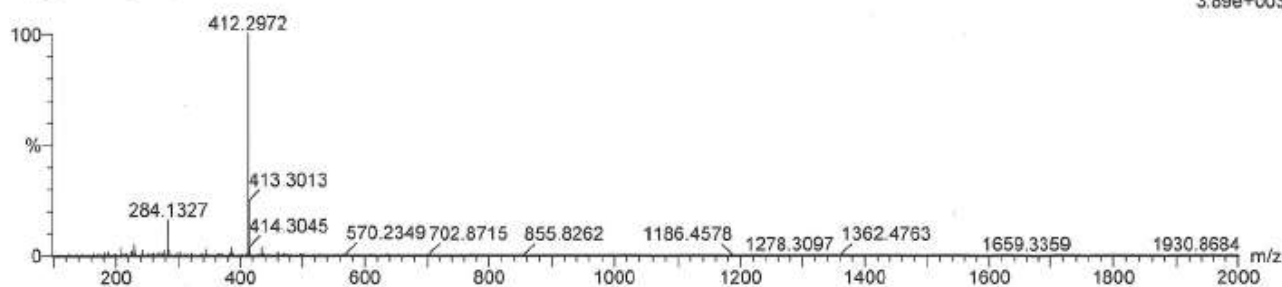

## Compound: 6b

### Single Mass Analysis

Tolerance = 3.0 mDa / DBE: min = -1.5, max = 50.0

Element prediction: Off

Number of isotope peaks used for i-FIT = 3

Monoisotopic Mass, Even Electron Ions

1239 formula(e) evaluated with 3 results within limits (up to 50 best isotopic matches for each mass)

Elements Used:

C: 0-80 H: 0-160 N: 0-12 O: 0-11 <sup>23</sup>Na: 0-1 F: 1-1

13-Dec-2022 07:03:06

HY\_1\_83 23 (1.128)

1: TOF MS ES+  
5.36e+002

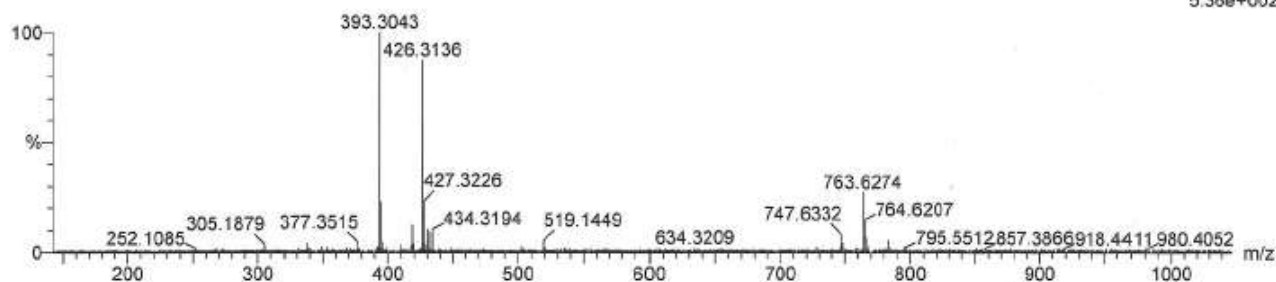

## Compound: 6c

### Single Mass Analysis

Tolerance = 3.0 mDa / DBE: min = -1.5, max = 50.0

Element prediction: Off

Number of isotope peaks used for i-FIT = 3

Monoisotopic Mass, Even Electron Ions

1027 formula(e) evaluated with 4 results within limits (up to 50 best isotopic matches for each mass)

Elements Used:

C: 0-80 H: 0-160 N: 0-12 O: 0-11 <sup>23</sup>Na: 0-1 Br: 1-1

13-Dec-2022 07:58:11

HY\_1\_91 23 (1.129)

1: TOF MS ES+  
8.90e+004

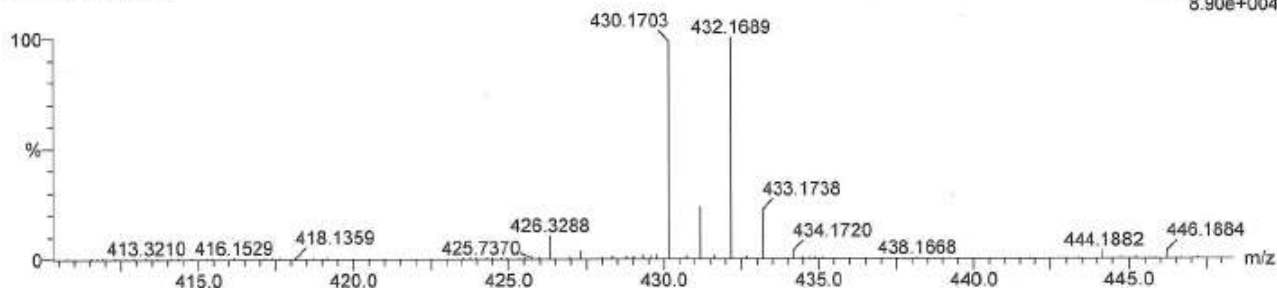

## Compound: 6d

### Single Mass Analysis

Tolerance = 10.0 mDa / DBE: min = -1.5, max = 50.0

Element prediction: Off

Number of isotope peaks used for i-FIT = 2

Monoisotopic Mass, Even Electron Ions

148 formula(e) evaluated with 4 results within limits (up to 100 closest results for each mass)

Elements Used:

C: 0-20 H: 0-50 N: 0-5 O: 0-5 <sup>23</sup>Na: 0-1 Br: 1-1

10-Dec-2019

HY\_1\_093 13 (0.631)

KIM  
1: TOF MS ES+  
2.18e+005

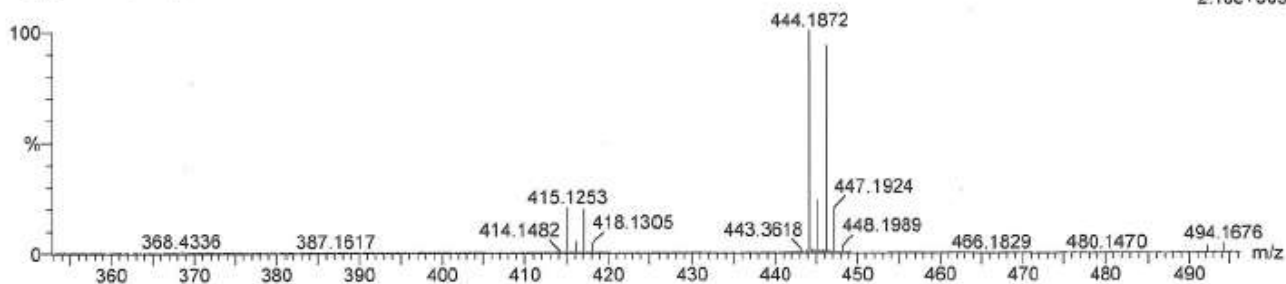

## Compound: 9a

### Single Mass Analysis

Tolerance = 3.0 mDa / DBE: min = -1.5, max = 100.0

Element prediction: Off

Number of isotope peaks used for i-FIT = 3

Monoisotopic Mass, Even Electron Ions

1179 formula(e) evaluated with 8 results within limits (up to 10 best isotopic matches for each mass)

Elements Used:

C: 0-50 H: 0-100 N: 0-10 O: 0-10 <sup>23</sup>Na: 0-1 S: 1-1 Br: 1-1

13-Jun-2021

HY\_2\_163\_OFF\_SAMPLE 13 (0.733)

KIM  
1: TOF MS ES+  
2.91e+005

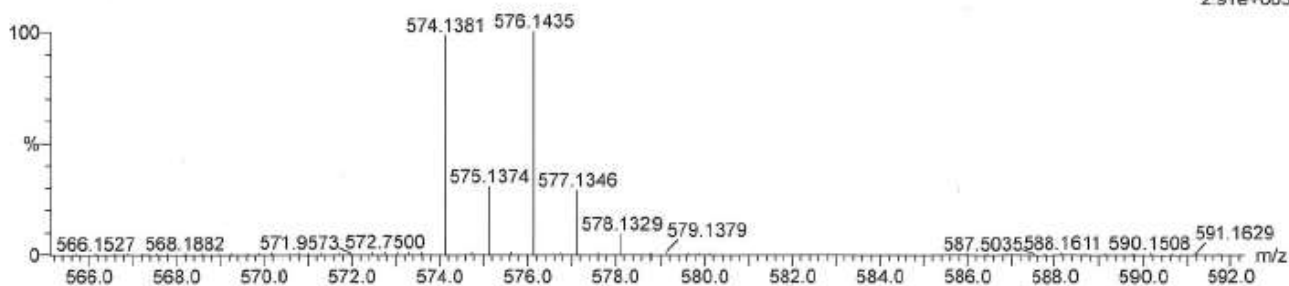

## Compound: 9b

### Single Mass Analysis

Tolerance = 4.0 mDa / DBE: min = -1.5, max = 50.0

Element prediction: Off

Number of isotope peaks used for i-FIT = 3

Monoisotopic Mass, Even Electron Ions

2209 formula(e) evaluated with 11 results within limits (up to 50 best isotopic matches for each mass)

Elements Used:

C: 0-50 H: 0-100 N: 0-6 O: 0-6 F: 0-1 <sup>23</sup>Na: 0-1 S: 0-1 Br: 1-1

17-Feb-2020

GHY\_1\_157 17 (0.817)

KIM  
1: TOF MS ES+  
3.89e+004

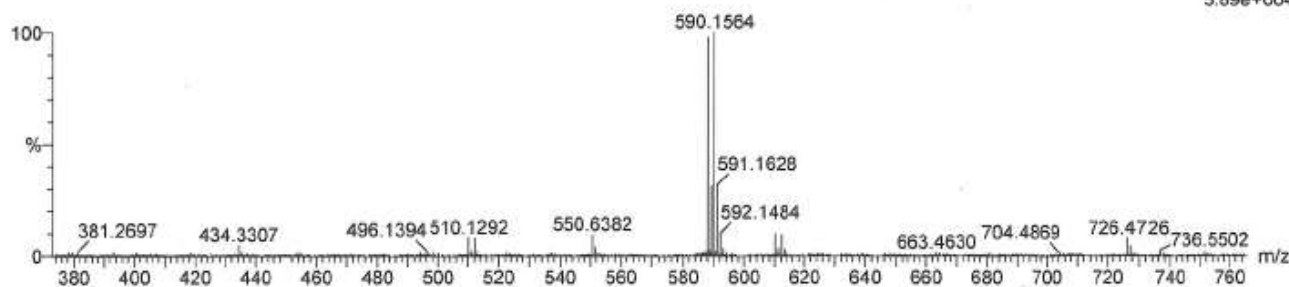

## Compound: 11a

### Single Mass Analysis

Tolerance = 3.0 mDa / DBE: min = -1.5, max = 100.0

Element prediction: Off

Number of isotope peaks used for i-FIT = 3

Monoisotopic Mass, Even Electron Ions

1177 formula(e) evaluated with 5 results within limits (up to 10 best isotopic matches for each mass)

Elements Used:

C: 0-50 H: 0-100 N: 0-10 O: 0-10 <sup>23</sup>Na: 0-1 S: 1-1 Br: 1-1

27-Feb-2021

HY\_2\_174\_2 54 (1.597) Cm (54.57)

KIM  
1: TOF MS ES+  
2.31e+004

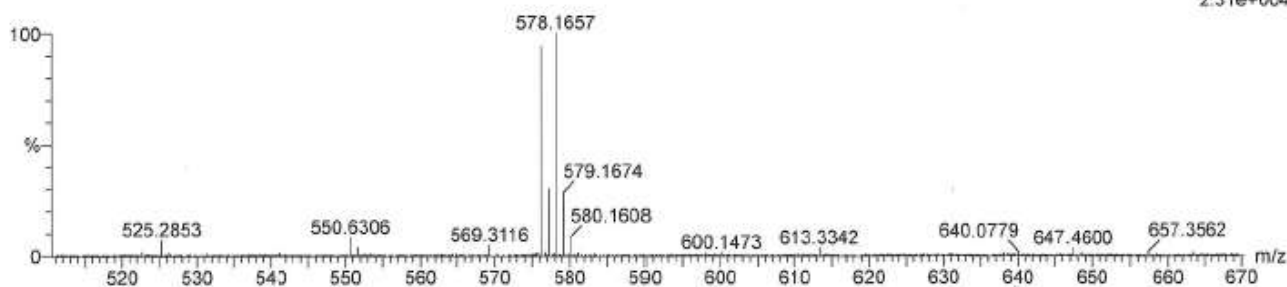

## Compound: 11b

### Single Mass Analysis

Tolerance = 3.0 mDa / DBE: min = -1.5, max = 50.0

Element prediction: Off

Number of isotope peaks used for i-FIT = 3

Monoisotopic Mass, Even Electron Ions

1221 formula(e) evaluated with 6 results within limits (up to 50 best isotopic matches for each mass)

Elements Used:

C: 0-100 H: 0-200 N: 0-10 O: 0-10 <sup>23</sup>Na: 0-1 S: 1-1 Br: 1-1

13-Feb-2020

HY\_1\_157\_12 (0.596)

KIM  
1: TOF MS ES+  
3.30e+004

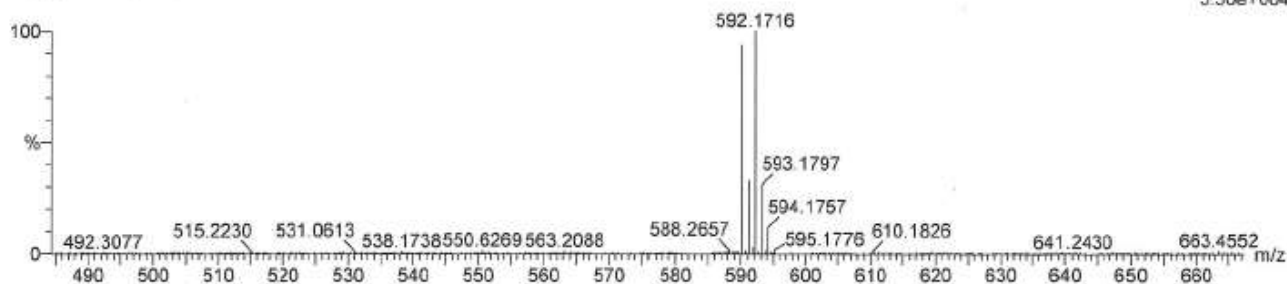

## Compound: 12

### Single Mass Analysis

Tolerance = 3.0 mDa / DBE: min = -1.5, max = 100.0

Element prediction: Off

Number of isotope peaks used for i-FIT = 3

Monoisotopic Mass, Even Electron Ions

619 formula(e) evaluated with 4 results within limits (up to 10 best isotopic matches for each mass)

Elements Used:

C: 0-50 H: 0-92 N: 0-10 O: 0-13 <sup>23</sup>Na: 0-1 Br: 1-1

04-Jan-2021

HY\_02\_130 37 (1.113) Cm (37:40-3:6)

KIM  
1: TOF MS ES+  
2.51e+004

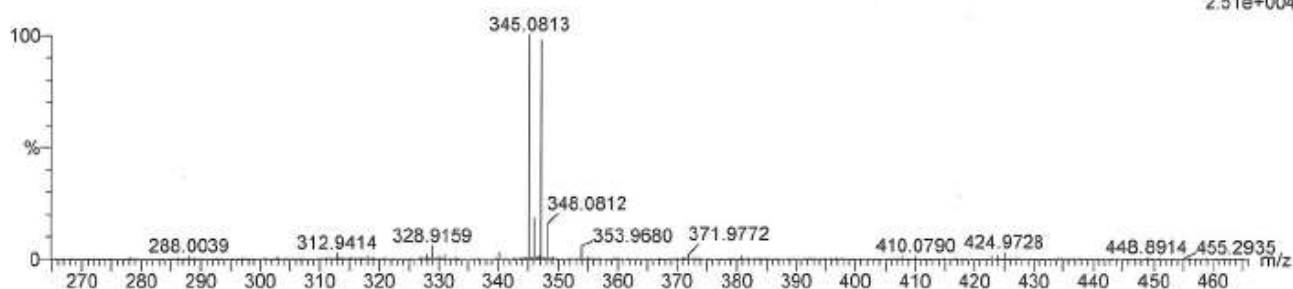

## Compound: 14

### Single Mass Analysis

Tolerance = 3.0 mDa / DBE: min = -1.5, max = 100.0

Element prediction: Off

Number of isotope peaks used for i-FIT = 3

Monoisotopic Mass, Even Electron Ions

224 formula(e) evaluated with 1 results within limits (up to 10 best isotopic matches for each mass)

Elements Used:

C: 17-17 H: 0-100 N: 0-10 O: 0-10 <sup>23</sup>Na: 0-1 S: 1-1

06-Mar-2021

HY\_2\_74\_HR 28 (0.844)

KIM  
1: TOF MS ES+  
1.22e+004

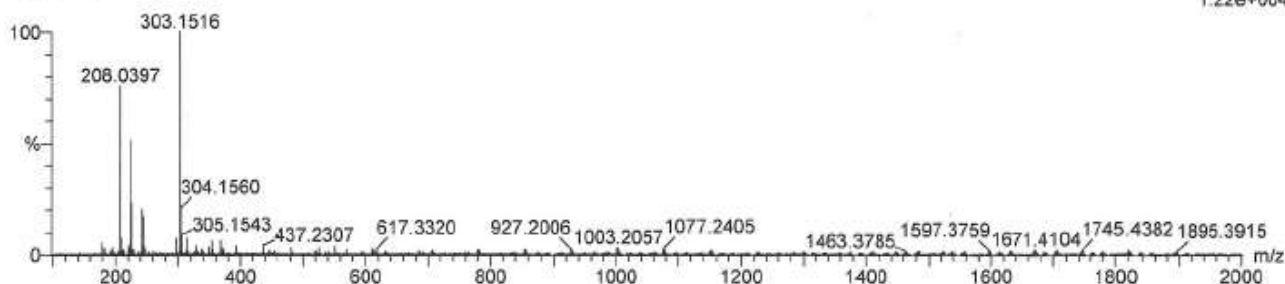

## Compound: 20a

### Single Mass Analysis

Tolerance = 2.0 mDa / DBE: min = -1.5, max = 100.0

Element prediction: Off

Number of isotope peaks used for i-FIT = 3

Monoisotopic Mass, Even Electron Ions

2724 formula(e) evaluated with 8 results within limits (up to 25 best isotopic matches for each mass)

Elements Used:

C: 0-108 H: 0-200 N: 0-16 O: 0-24 <sup>23</sup>Na: 0-1 S: 1-1 Br: 1-1

03-Dec-2020

HY\_02\_109 16 (0.773)

KIM  
1: TOF MS ES+  
7.09e+004

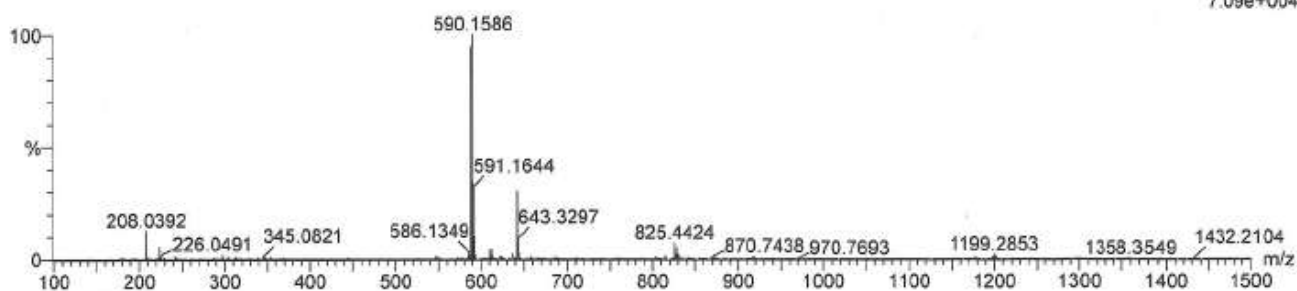

## Compound: 20b

### Single Mass Analysis

Tolerance = 3.0 PPM / DBE: min = -1.5, max = 100.0

Element prediction: Off

Number of isotope peaks used for i-FIT = 3

Monoisotopic Mass, Even Electron Ions

547 formula(e) evaluated with 2 results within limits (up to 25 best isotopic matches for each mass)

Elements Used:

C: 0-108 H: 0-200 N: 0-6 O: 0-6 <sup>23</sup>Na: 0-1 S: 1-1 Br: 1-1

05-Dec-2020

HY\_02\_114 28 (0.844) Cm (28.29)

KIM  
1: TOF MS ES+  
1.66e+004

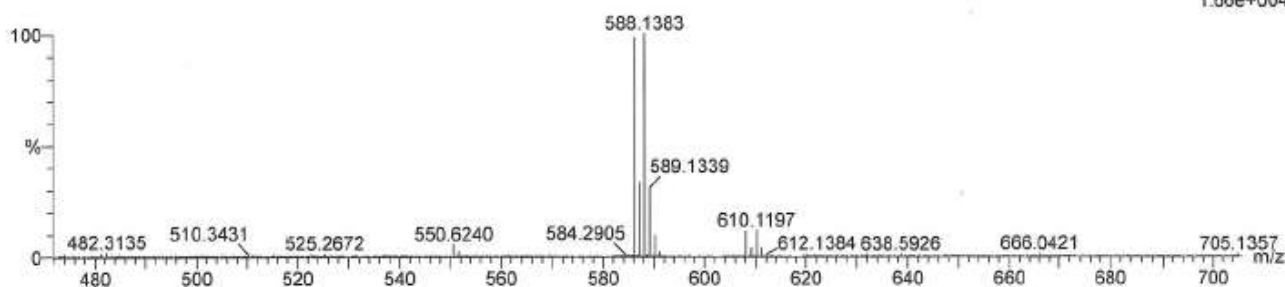

## Compound: 20c

### Single Mass Analysis

Tolerance = 3.0 mDa / DBE: min = -1.5, max = 100.0

Element prediction: Off

Number of isotope peaks used for i-FIT = 3

Monoisotopic Mass, Even Electron Ions

1609 formula(e) evaluated with 9 results within limits (up to 10 best isotopic matches for each mass)

Elements Used:

C: 0-50 H: 0-92 N: 0-10 O: 0-13 <sup>23</sup>Na: 0-1 S: 1-1 Br: 1-1 F: 1-1

13-Jan-2021

HY\_2\_134 47 (1.409) Cm (47.48)

KIM  
1: TOF MS ES+  
2.80e+004

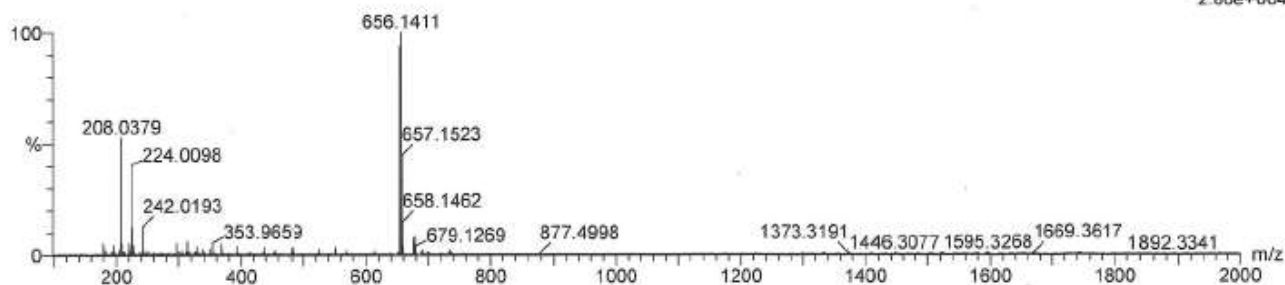

## Compound: 21a

### Single Mass Analysis

Tolerance = 3.0 mDa / DBE: min = -1.5, max = 100.0

Element prediction: Off

Number of isotope peaks used for i-FIT = 3

Monoisotopic Mass, Even Electron Ions

1051 formula(e) evaluated with 6 results within limits (up to 25 best isotopic matches for each mass)

Elements Used:

C: 0-59 H: 0-75 N: 0-8 O: 0-11 <sup>23</sup>Na: 0-1 Br: 1-1

24-Nov-2020

HY\_02\_090\_24nov2020 13 (0.641)

KIM  
1: TOF MS ES+  
5.15e+004

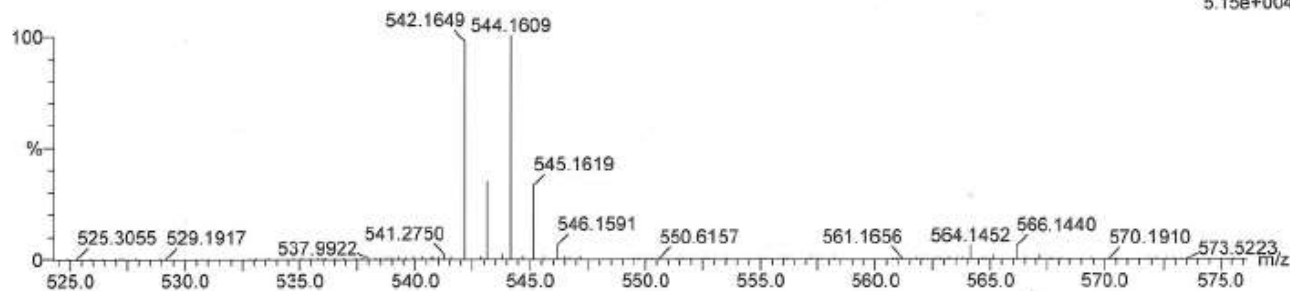

## Compound: 21b

### Single Mass Analysis

Tolerance = 3.0 mDa / DBE: min = -1.5, max = 100.0

Element prediction: Off

Number of isotope peaks used for i-FIT = 3

Monoisotopic Mass, Even Electron Ions

1049 formula(e) evaluated with 8 results within limits (up to 25 best isotopic matches for each mass)

Elements Used:

C: 0-59 H: 0-75 N: 0-8 O: 0-11 <sup>23</sup>Na: 0-1 Br: 1-1

24-Nov-2020

HY\_02\_091.12 (0.596)

KIM  
1: TOF MS ES+  
4.35e+004

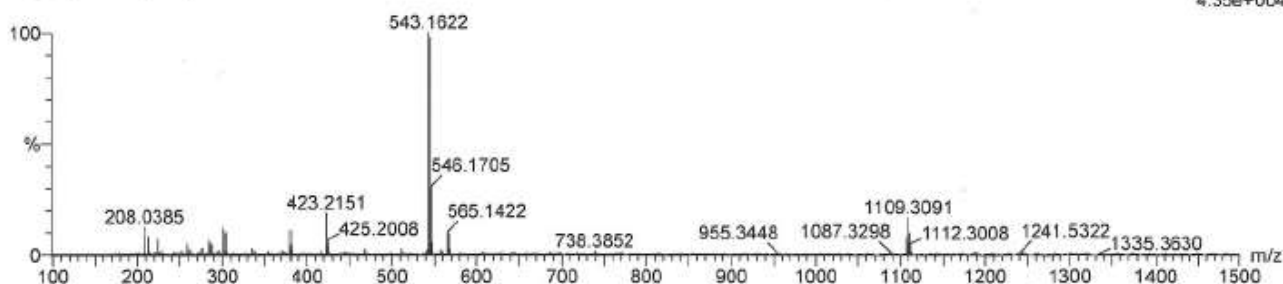

## Compound: 21c

### Single Mass Analysis

Tolerance = 3.0 mDa / DBE: min = -1.5, max = 100.0

Element prediction: Off

Number of isotope peaks used for i-FIT = 3

Monoisotopic Mass, Even Electron Ions

1116 formula(e) evaluated with 8 results within limits (up to 25 best isotopic matches for each mass)

Elements Used:

C: 0-59 H: 0-75 N: 0-8 O: 0-11 <sup>23</sup>Na: 0-1 Br: 1-1

24-Nov-2020

HY\_02\_092.6 (0.284)

KIM  
1: TOF MS ES+  
2.38e+005

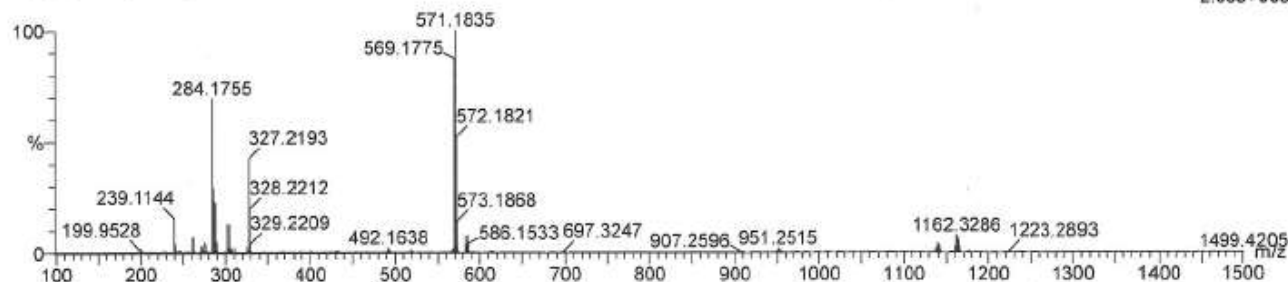

## Compound: 21d

### Single Mass Analysis

Tolerance = 3.0 mDa / DBE: min = -1.5, max = 100.0

Element prediction: Off

Number of isotope peaks used for i-FIT = 3

Monoisotopic Mass, Even Electron Ions

1018 formula(e) evaluated with 9 results within limits (up to 25 best isotopic matches for each mass)

Elements Used:

C: 0-59 H: 0-75 N: 0-8 O: 0-11 <sup>23</sup>Na: 0-1 Br: 1-1

24-Nov-2020

HY\_02\_093 18 (0.861)

KIM  
1: TOF MS ES+  
7.13e+003

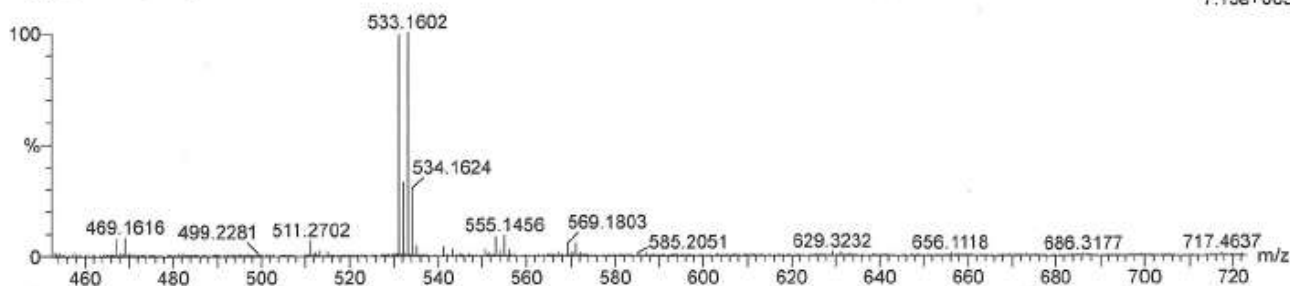

## Compound: 21e

### Single Mass Analysis

Tolerance = 3.0 mDa / DBE: min = -1.5, max = 100.0

Element prediction: Off

Number of isotope peaks used for i-FIT = 3

Monoisotopic Mass, Even Electron Ions

1020 formula(e) evaluated with 5 results within limits (up to 25 best isotopic matches for each mass)

Elements Used:

C: 0-59 H: 0-75 N: 0-8 O: 0-11 <sup>23</sup>Na: 0-1 Br: 1-1

24-Nov-2020

HY\_02\_095 18 (0.861)

KIM  
1: TOF MS ES+  
9.47e+002

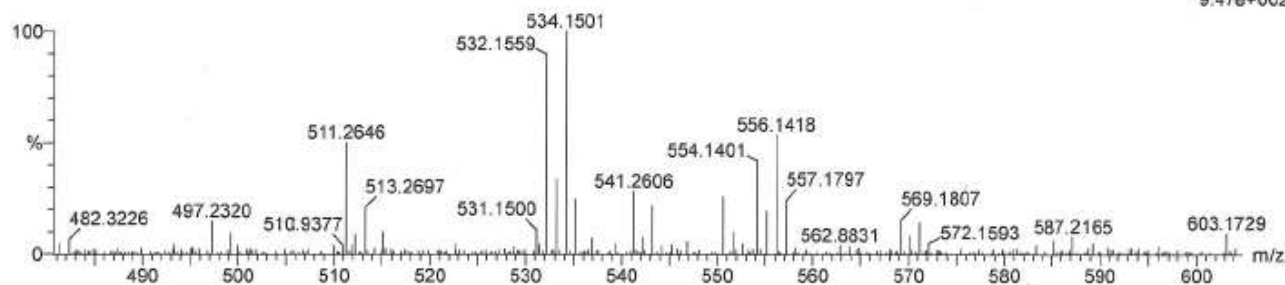

## Compound: 21f

### Single Mass Analysis

Tolerance = 2.0 mDa / DBE: min = -1.5, max = 100.0

Element prediction: Off

Number of isotope peaks used for i-FIT = 3

Monoisotopic Mass, Even Electron Ions

2045 formula(e) evaluated with 8 results within limits (up to 25 best isotopic matches for each mass)

Elements Used:

C: 0-108 H: 0-200 N: 0-16 O: 0-24 <sup>23</sup>Na: 0-1 Br: 1-1

03-Dec-2020

HY\_02\_111 10 (0.507)

KIM

1: TOF MS ES+

5.10e+005

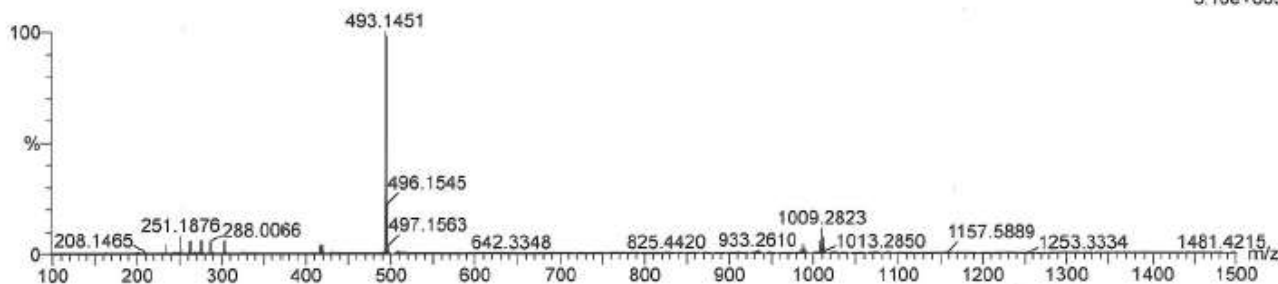

## Compound: 21g

### Single Mass Analysis

Tolerance = 3.0 mDa / DBE: min = -1.5, max = 100.0

Element prediction: Off

Number of isotope peaks used for i-FIT = 3

Monoisotopic Mass, Even Electron Ions

1179 formula(e) evaluated with 6 results within limits (up to 10 best isotopic matches for each mass)

Elements Used:

C: 0-50 H: 0-100 N: 0-10 O: 0-10 <sup>23</sup>Na: 0-1 S: 1-1 Br: 1-1

09-Feb-2021

HY\_2\_163 31 (0.925)

KIM

1: TOF MS ES+

1.25e+004

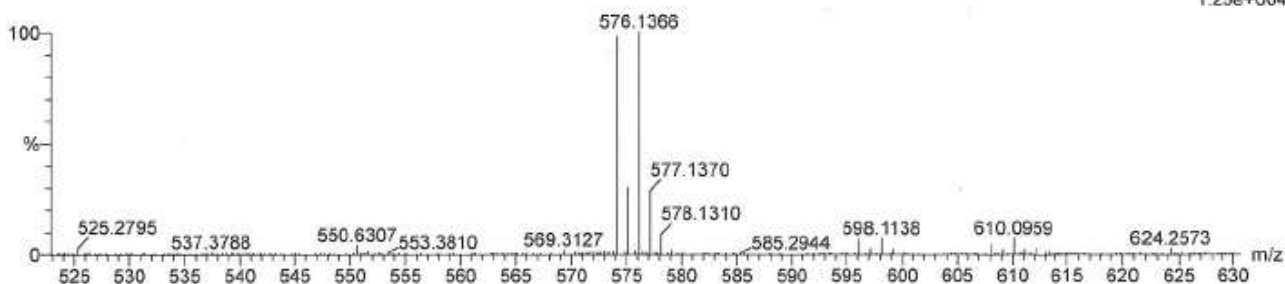

## Compound: 21h

### Single Mass Analysis

Tolerance = 3.0 mDa / DBE: min = -1.5, max = 50.0

Element prediction: Off

Number of isotope peaks used for i-FIT = 3

Monoisotopic Mass, Even Electron Ions

1426 formula(e) evaluated with 8 results within limits (up to 50 best isotopic matches for each mass)

Elements Used:

C: 0-80 H: 0-160 N: 0-12 O: 0-11 <sup>23</sup>Na: 0-1 Br: 1-1

13-Dec-2022 08:02:15

HY\_4\_9 10 (0.508)

1: TOF MS ES+  
1.07e+005

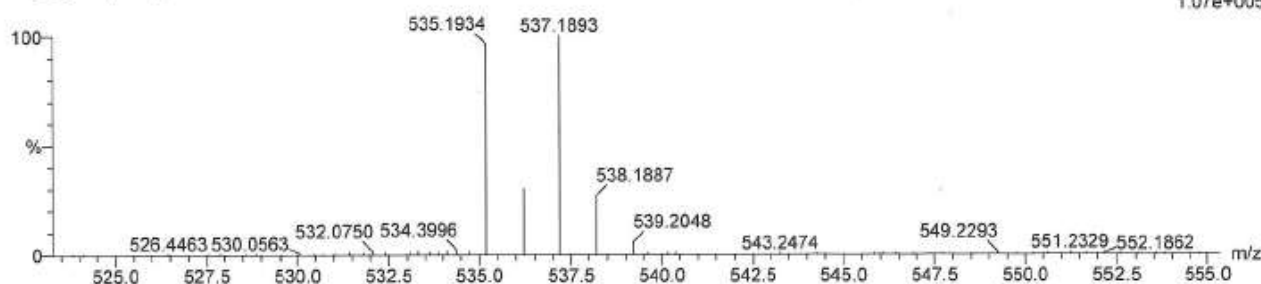

## Compound: 21i

### Single Mass Analysis

Tolerance = 3.0 mDa / DBE: min = -1.5, max = 100.0

Element prediction: Off

Number of isotope peaks used for i-FIT = 3

Monoisotopic Mass, Even Electron Ions

2007 formula(e) evaluated with 14 results within limits (up to 10 best isotopic matches for each mass)

Elements Used:

C: 0-50 H: 0-100 N: 0-10 O: 0-10 <sup>23</sup>Na: 0-1 S: 0-1 Br: 1-1

10-Feb-2021

HY\_2\_167 30 (0.898)

KIM  
1: TOF MS ES+  
1.54e+004

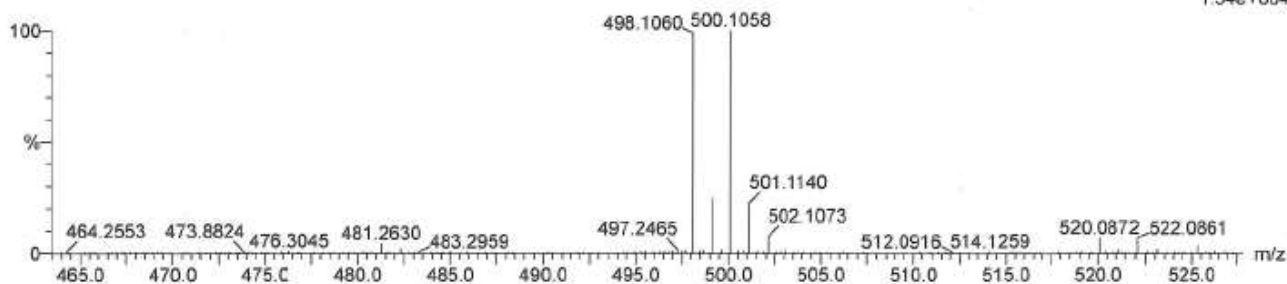

## Compound: 21j

### Single Mass Analysis

Tolerance = 3.0 mDa / DBE: min = -1.5, max = 100.0

Element prediction: Off

Number of isotope peaks used for i-FIT = 3

Monoisotopic Mass, Even Electron Ions

1181 formula(e) evaluated with 8 results within limits (up to 10 best isotopic matches for each mass)

Elements Used:

C: 0-50 H: 0-100 N: 0-10 O: 0-10 <sup>23</sup>Na: 0-1 Br: 1-1

17-Feb-2021

HY\_2\_169\_2 31 (0.924)

KIM  
1: TOF MS ES+  
6.37e+003

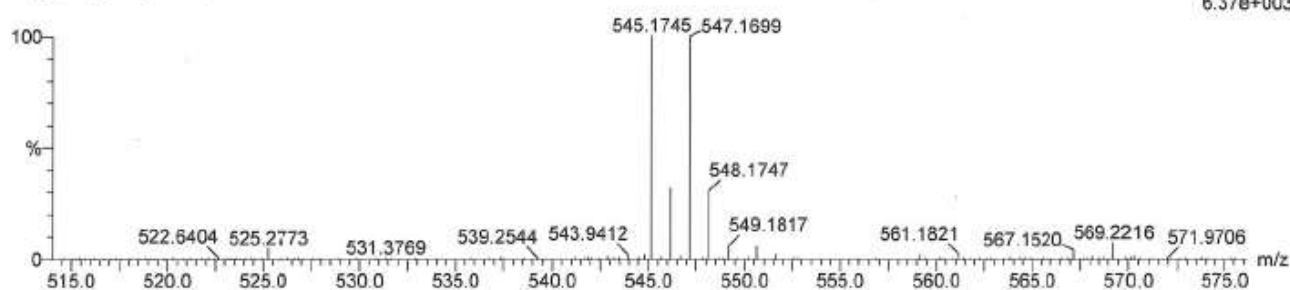

**$^1\text{H}$  or  $^{13}\text{C}$  NMR spectra**

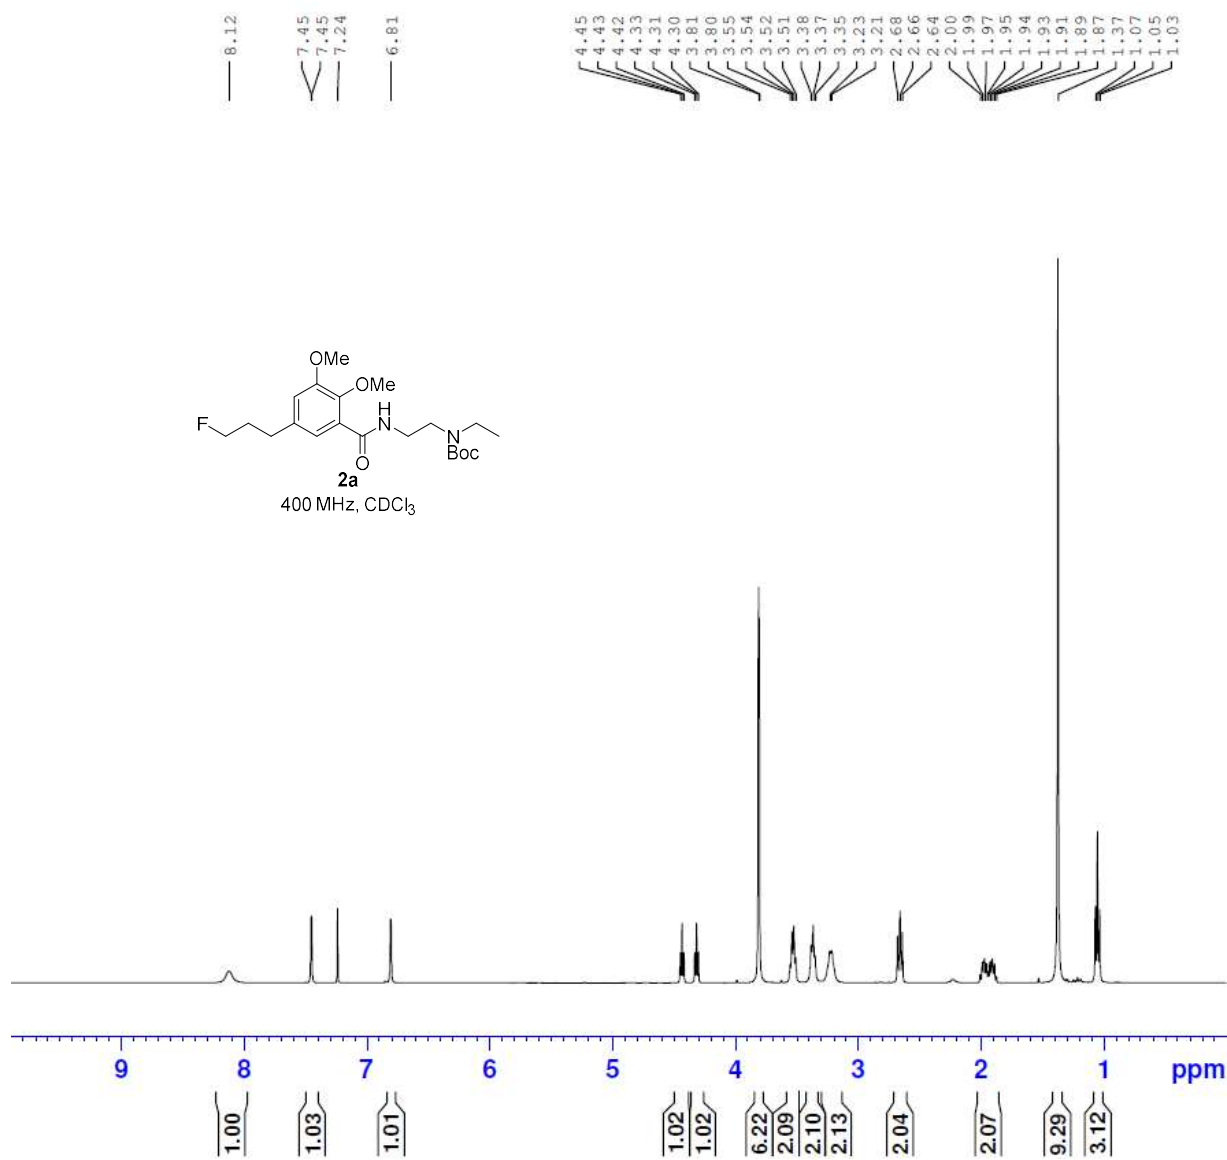

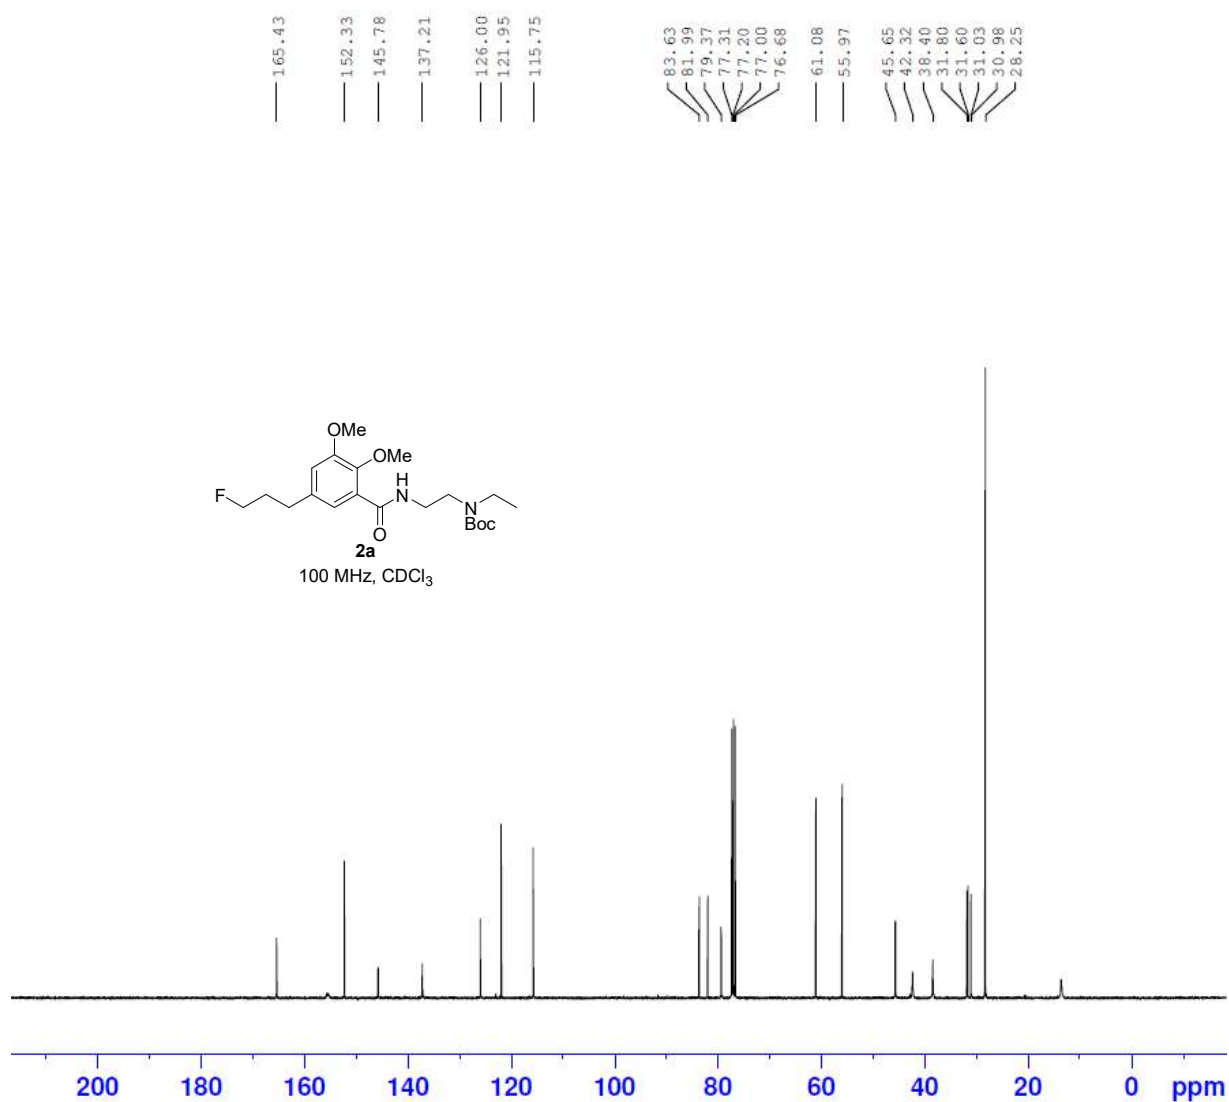

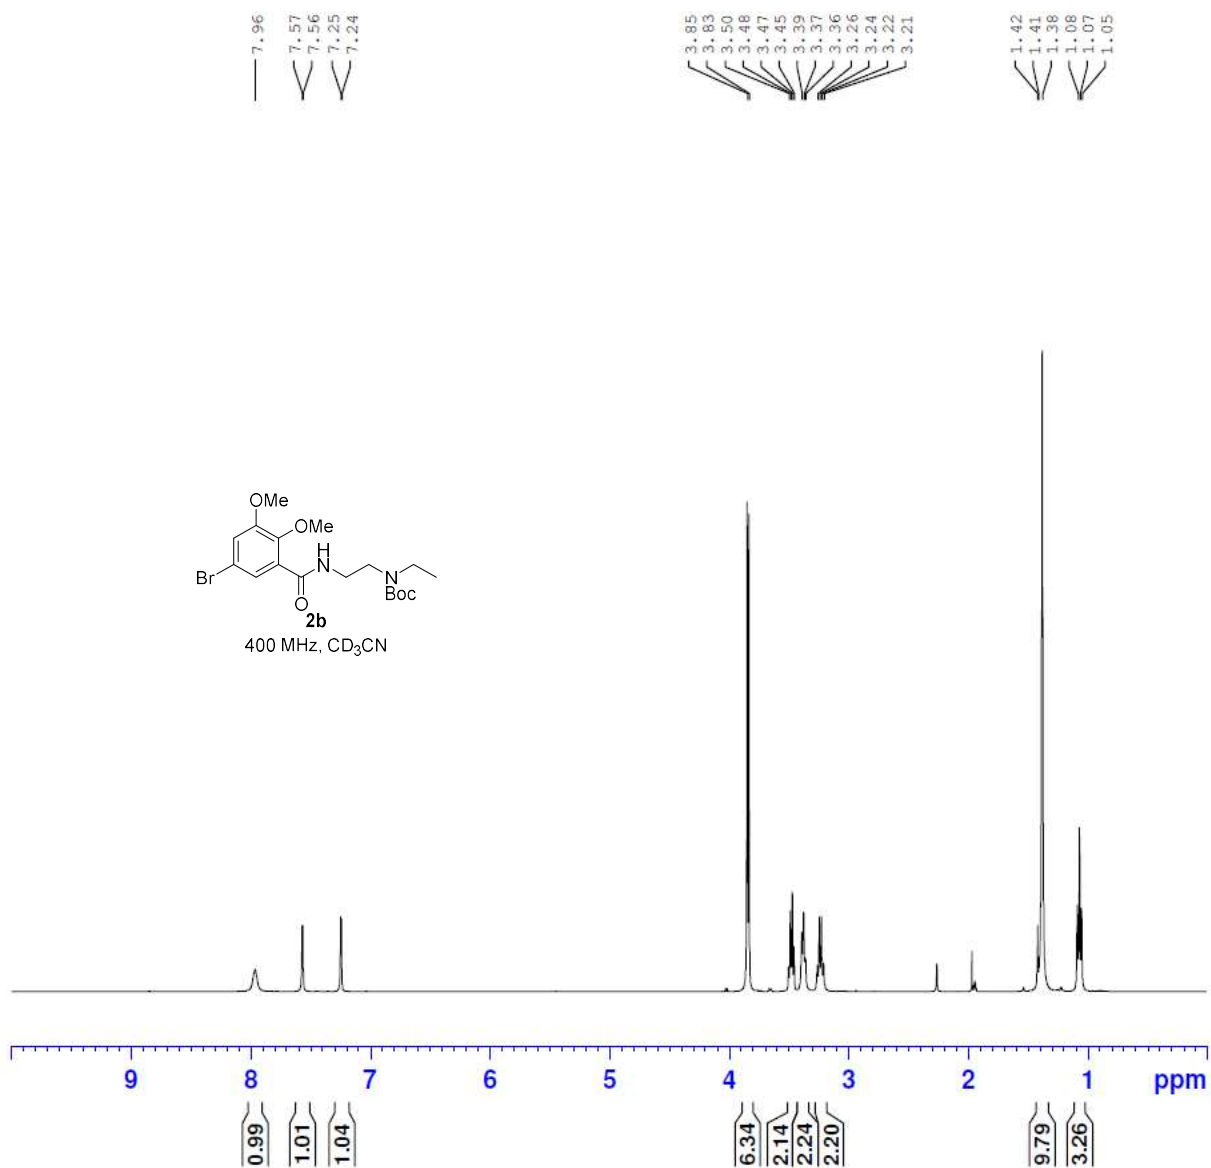

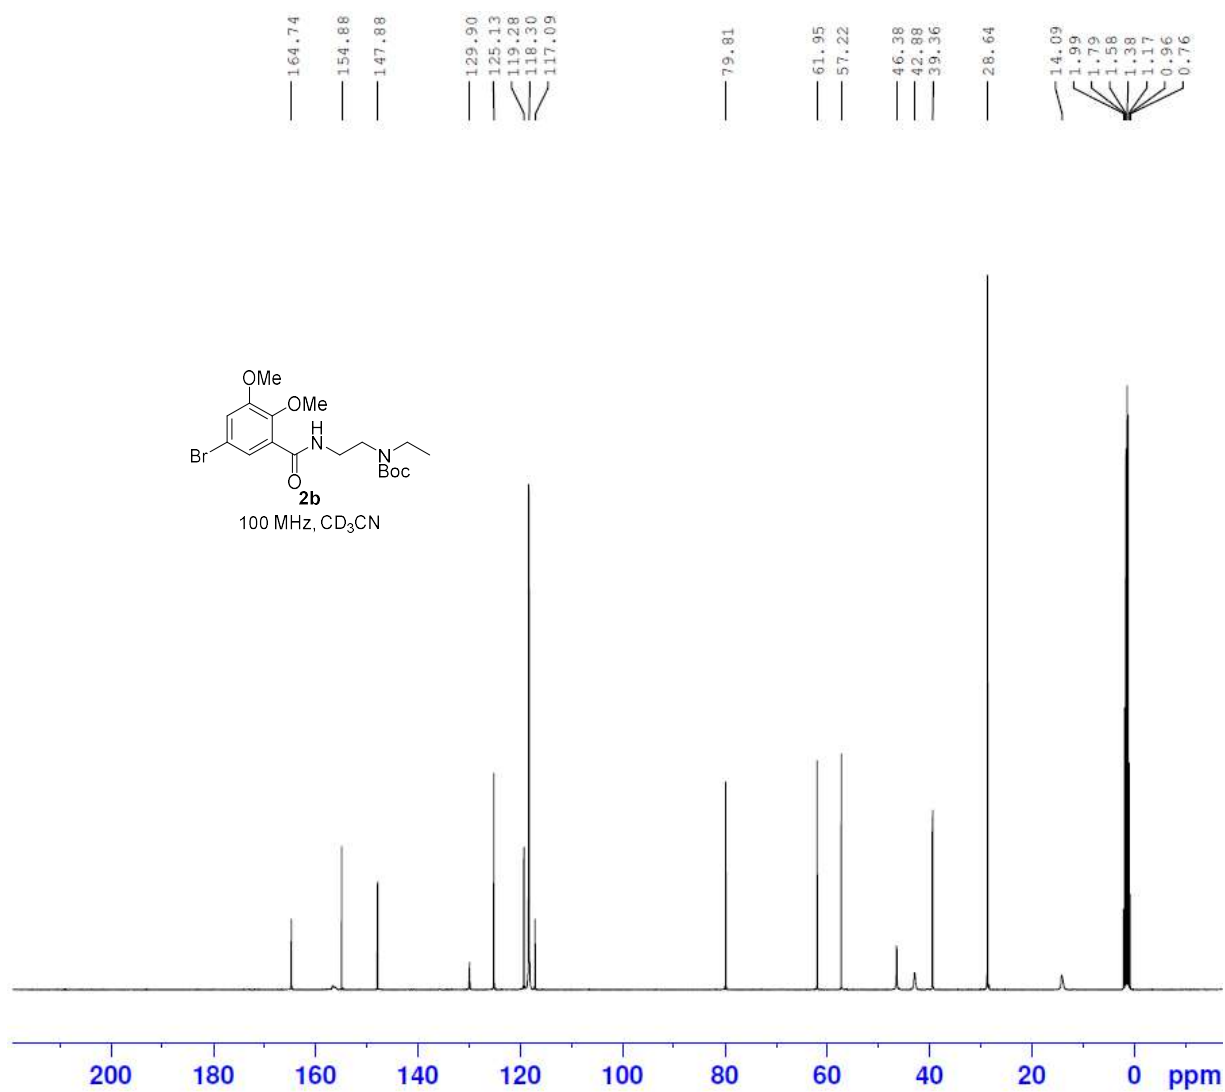

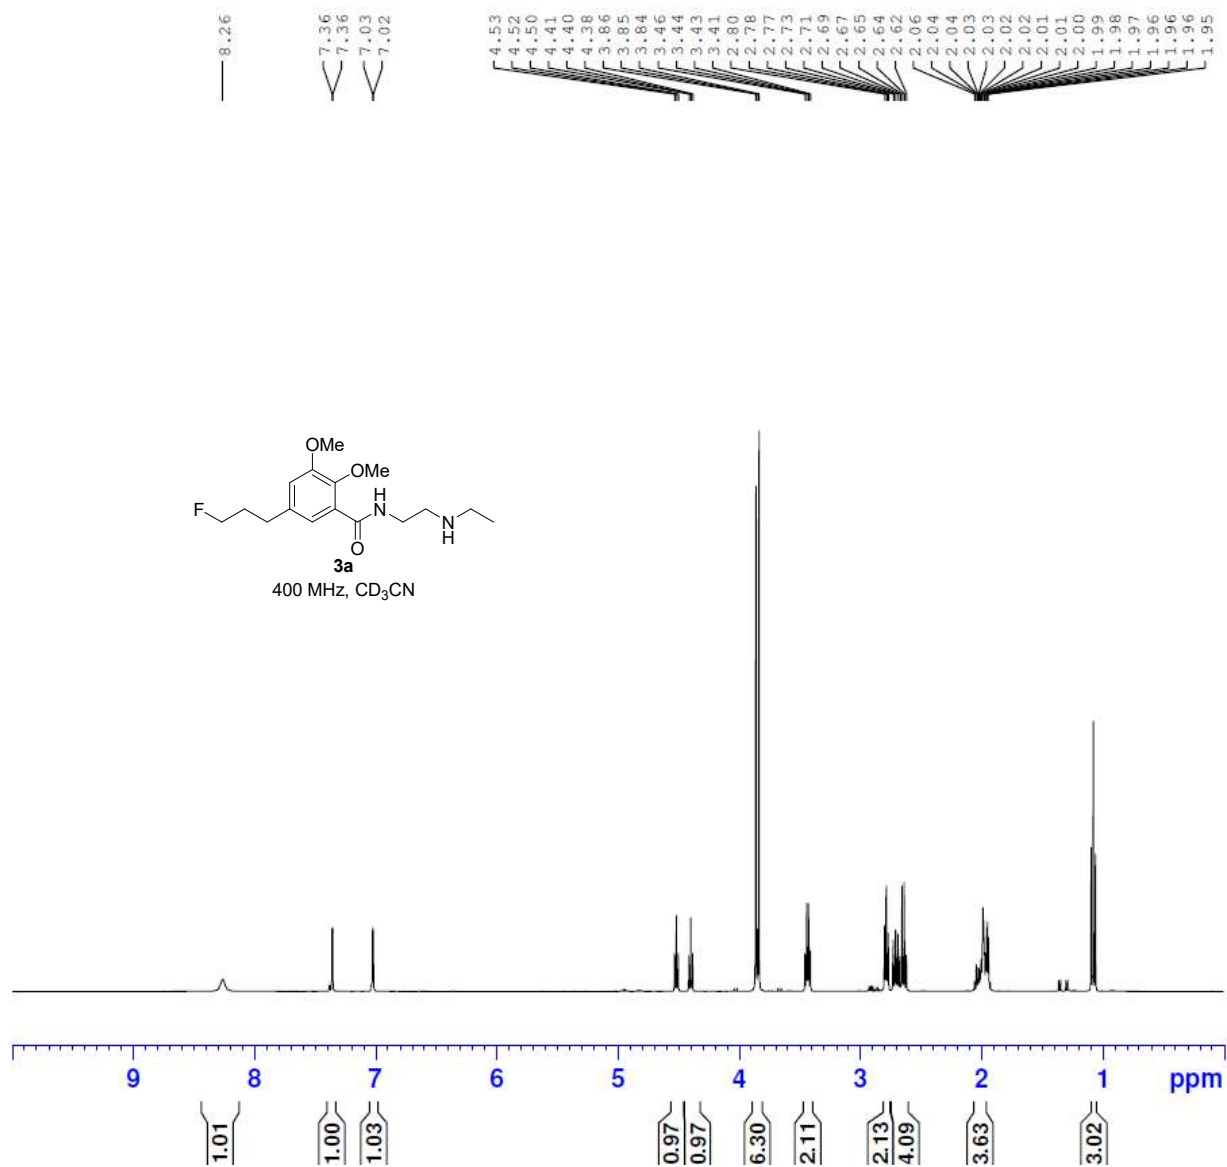

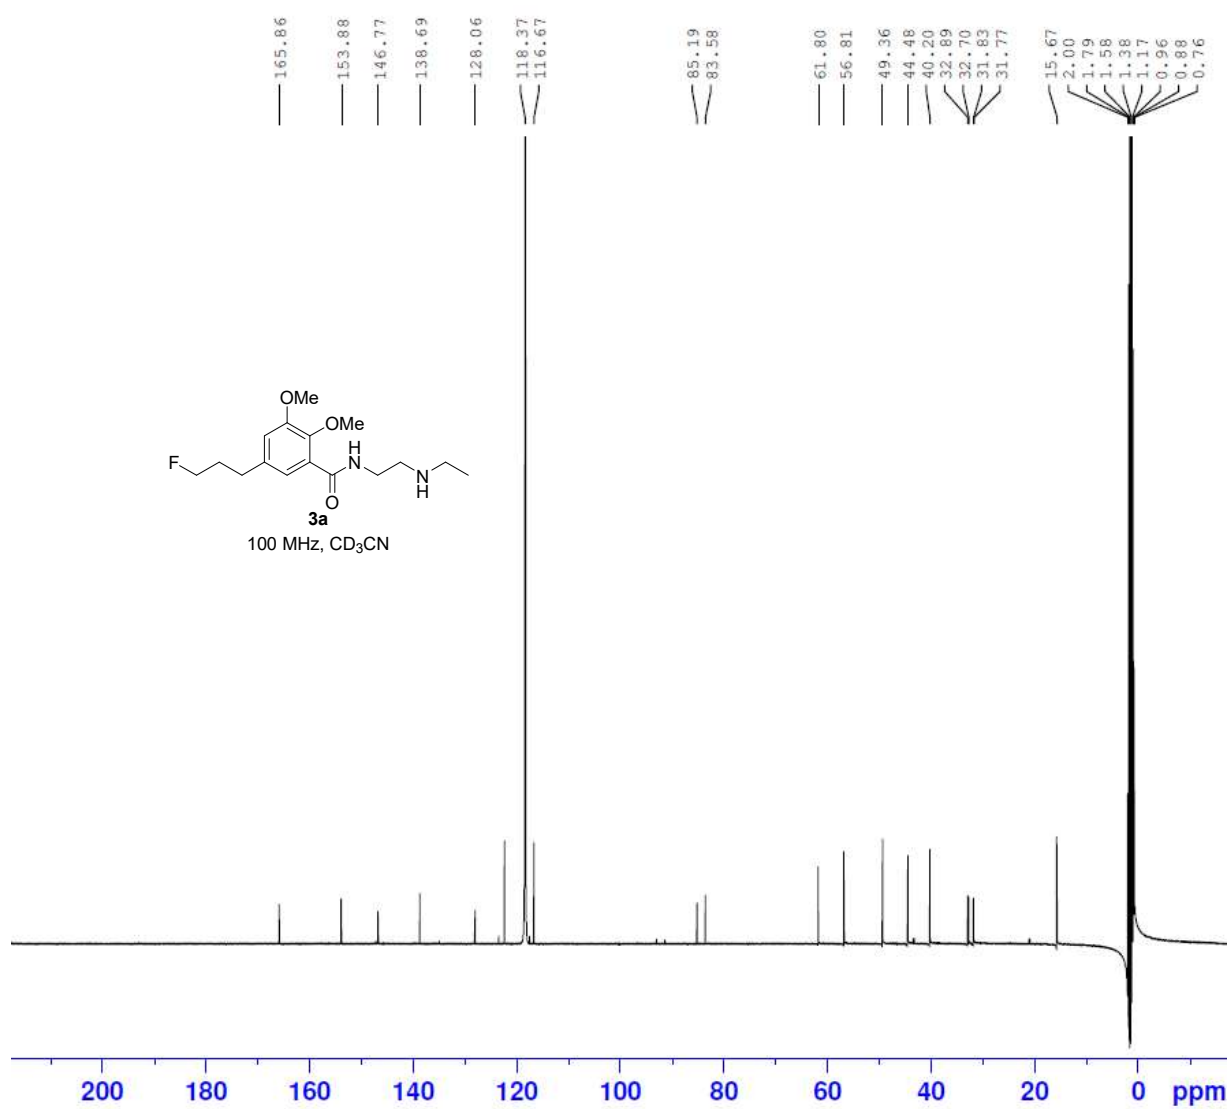

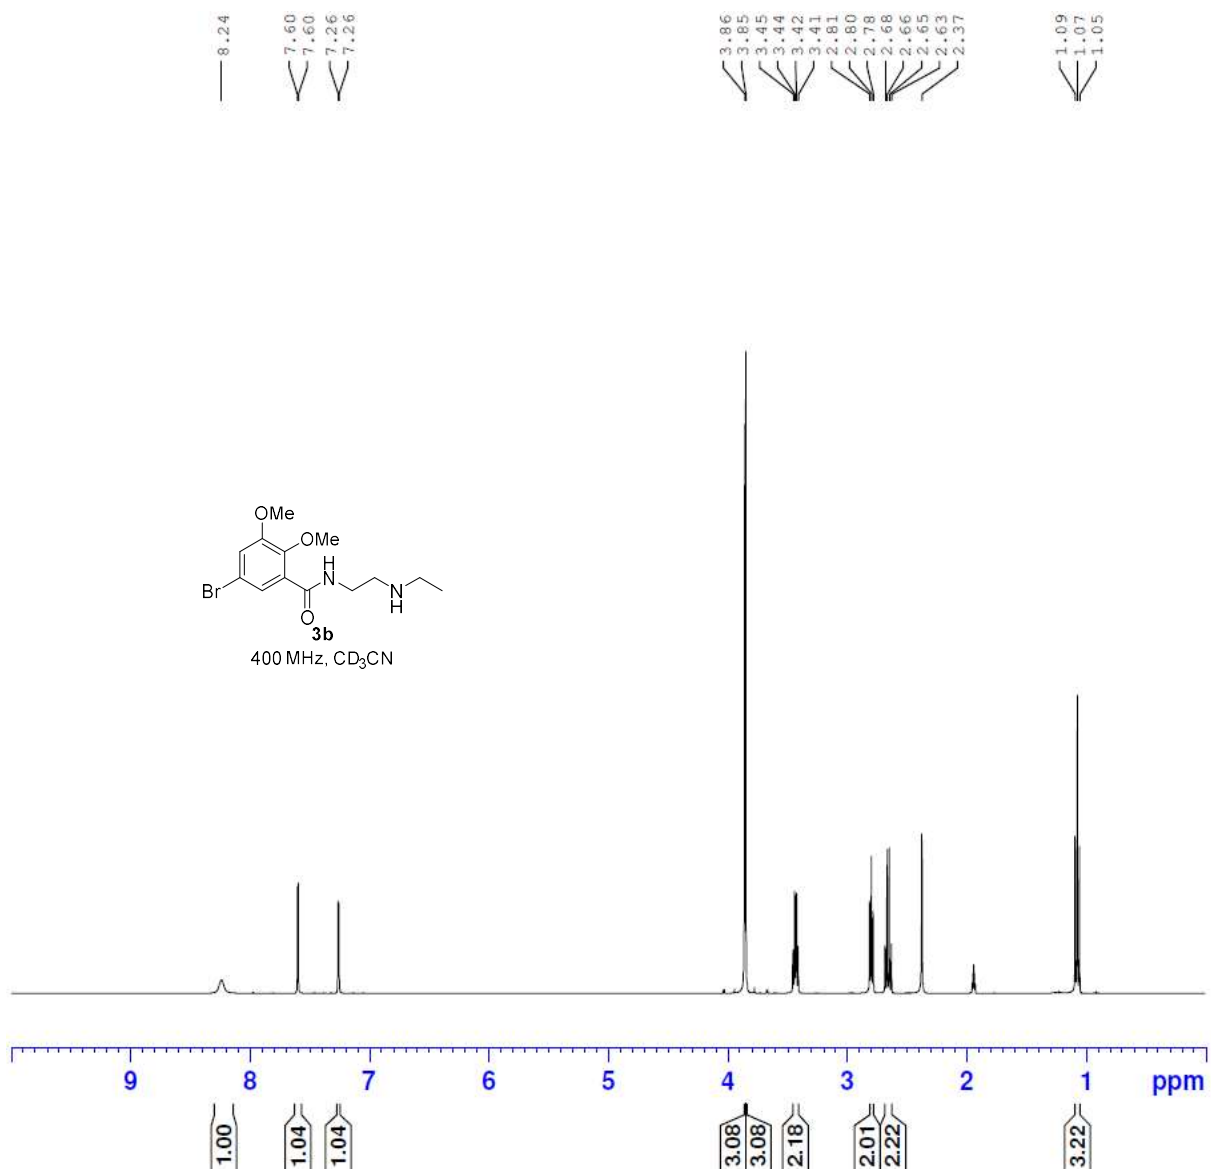

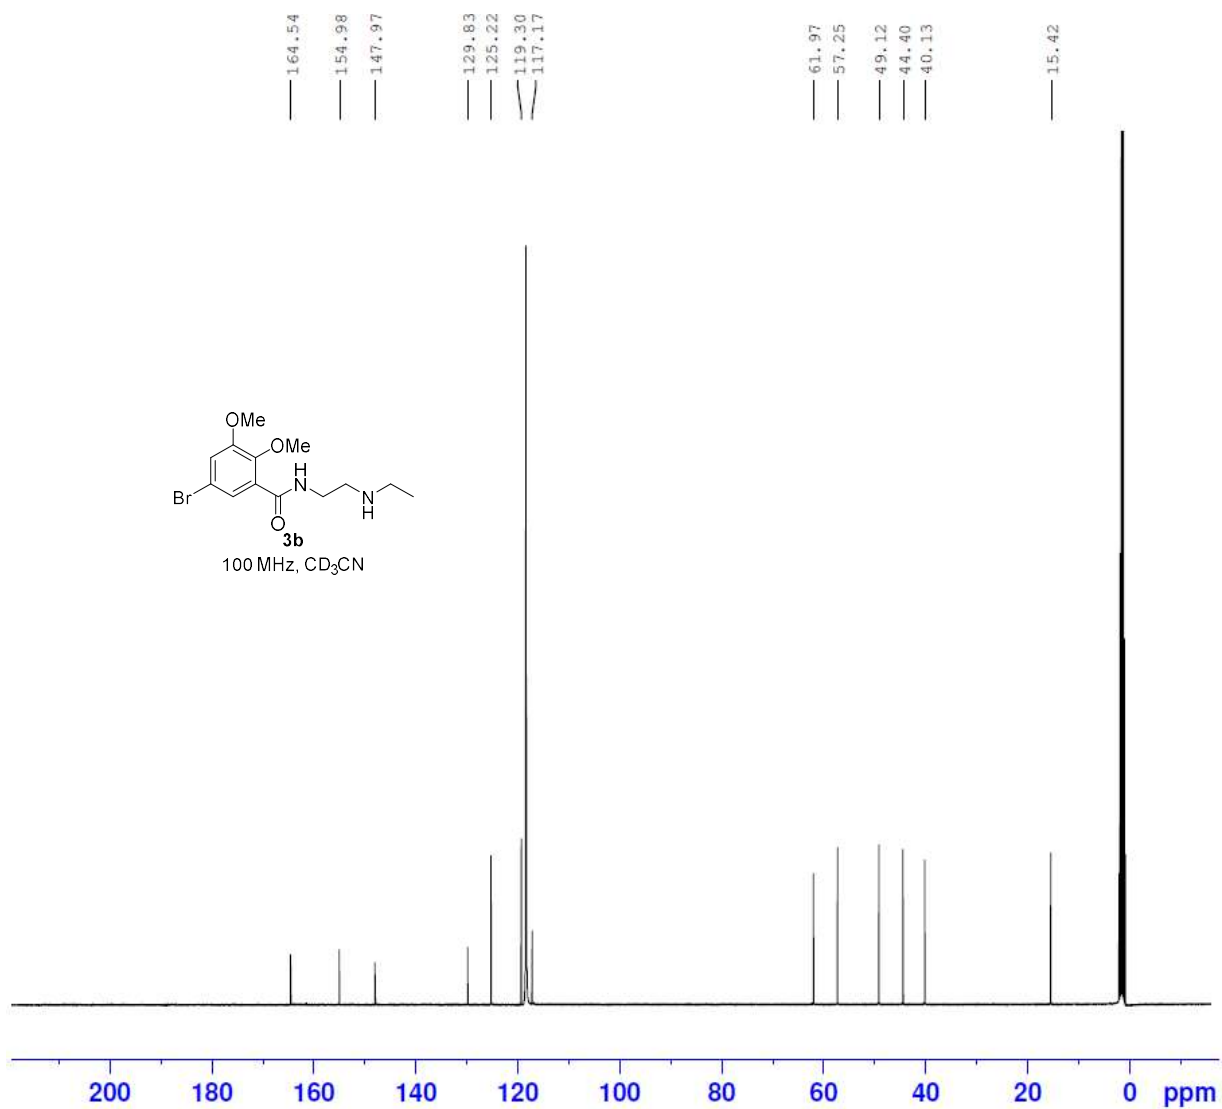

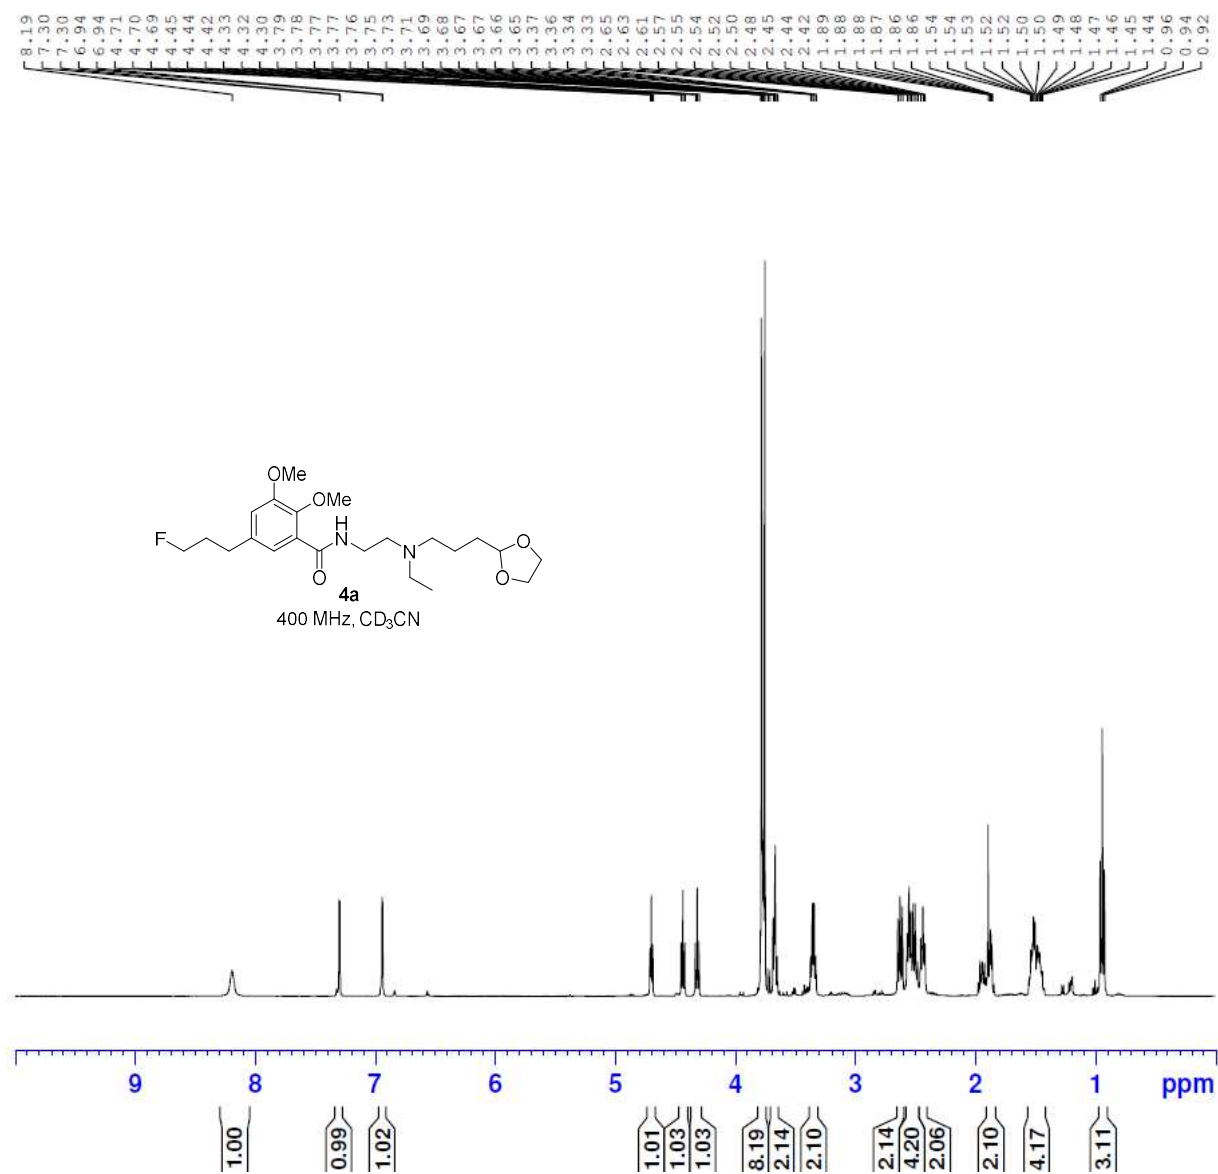

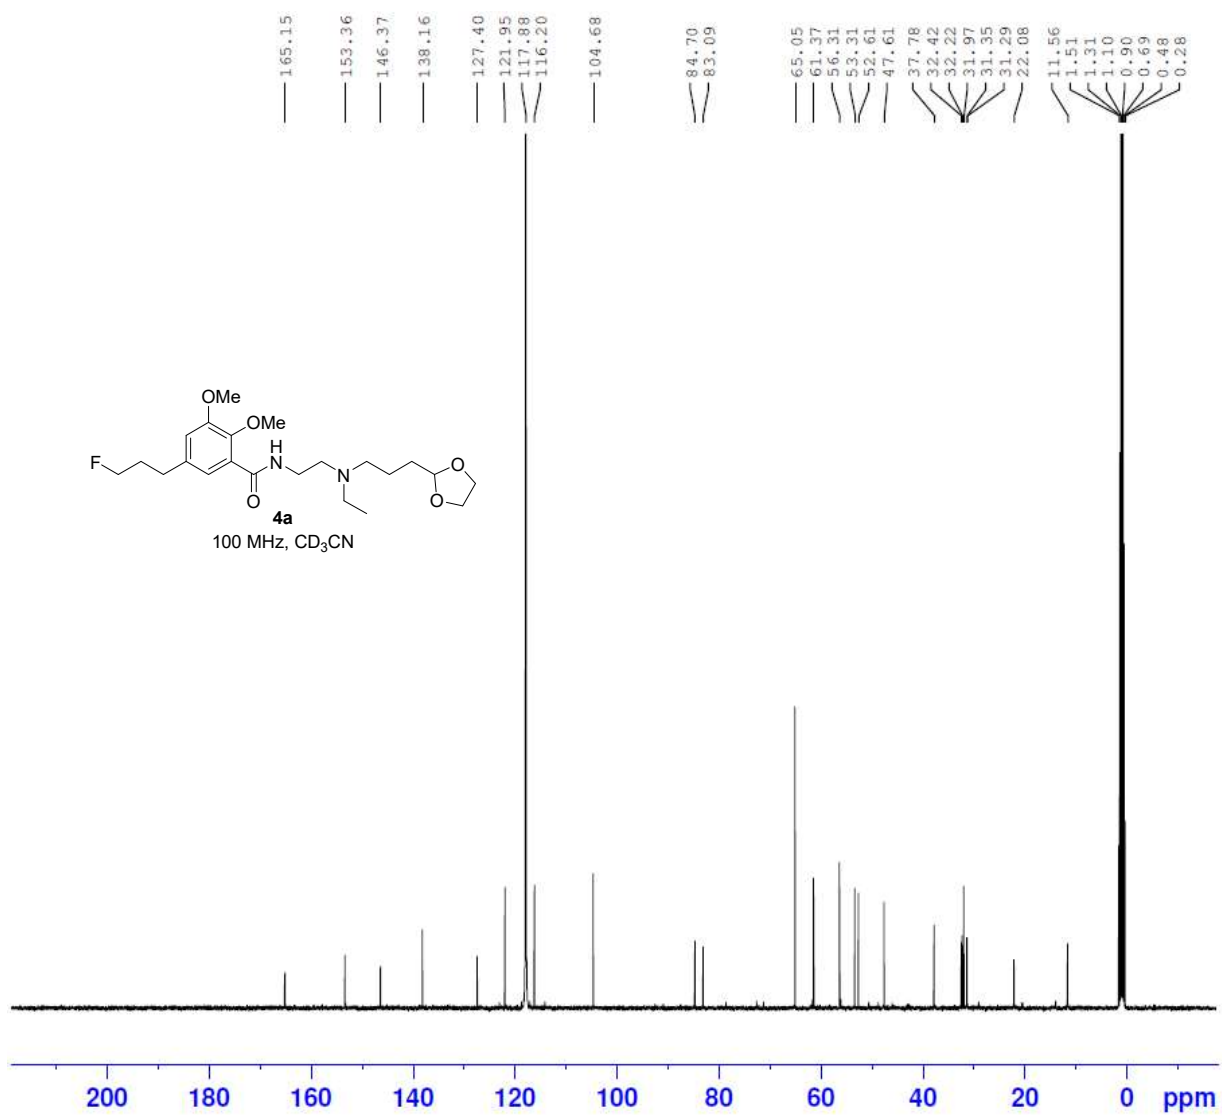

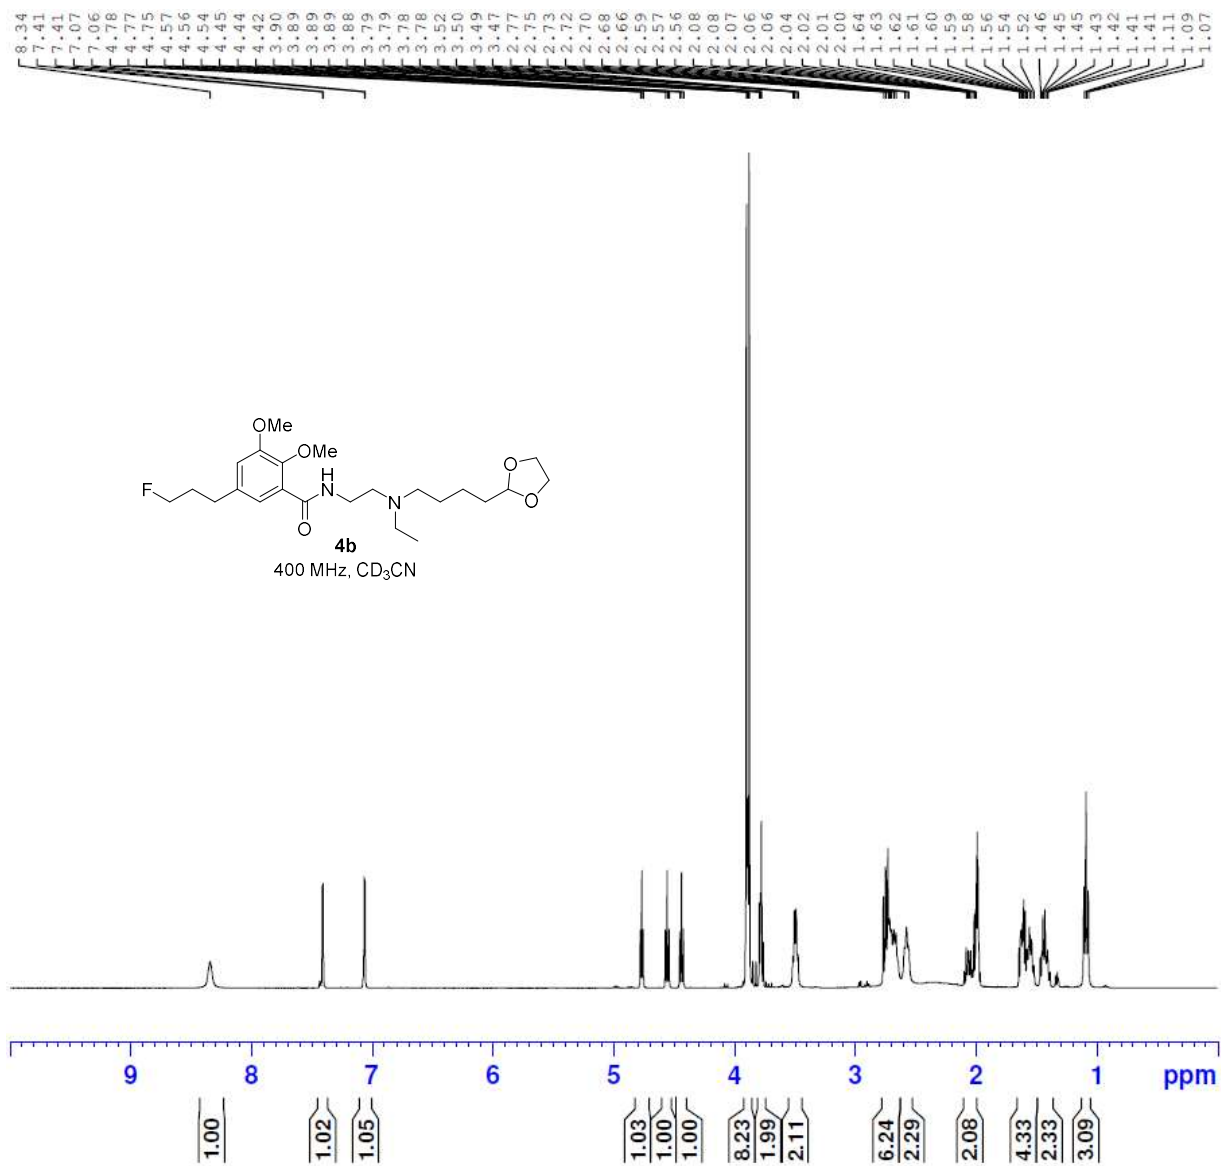

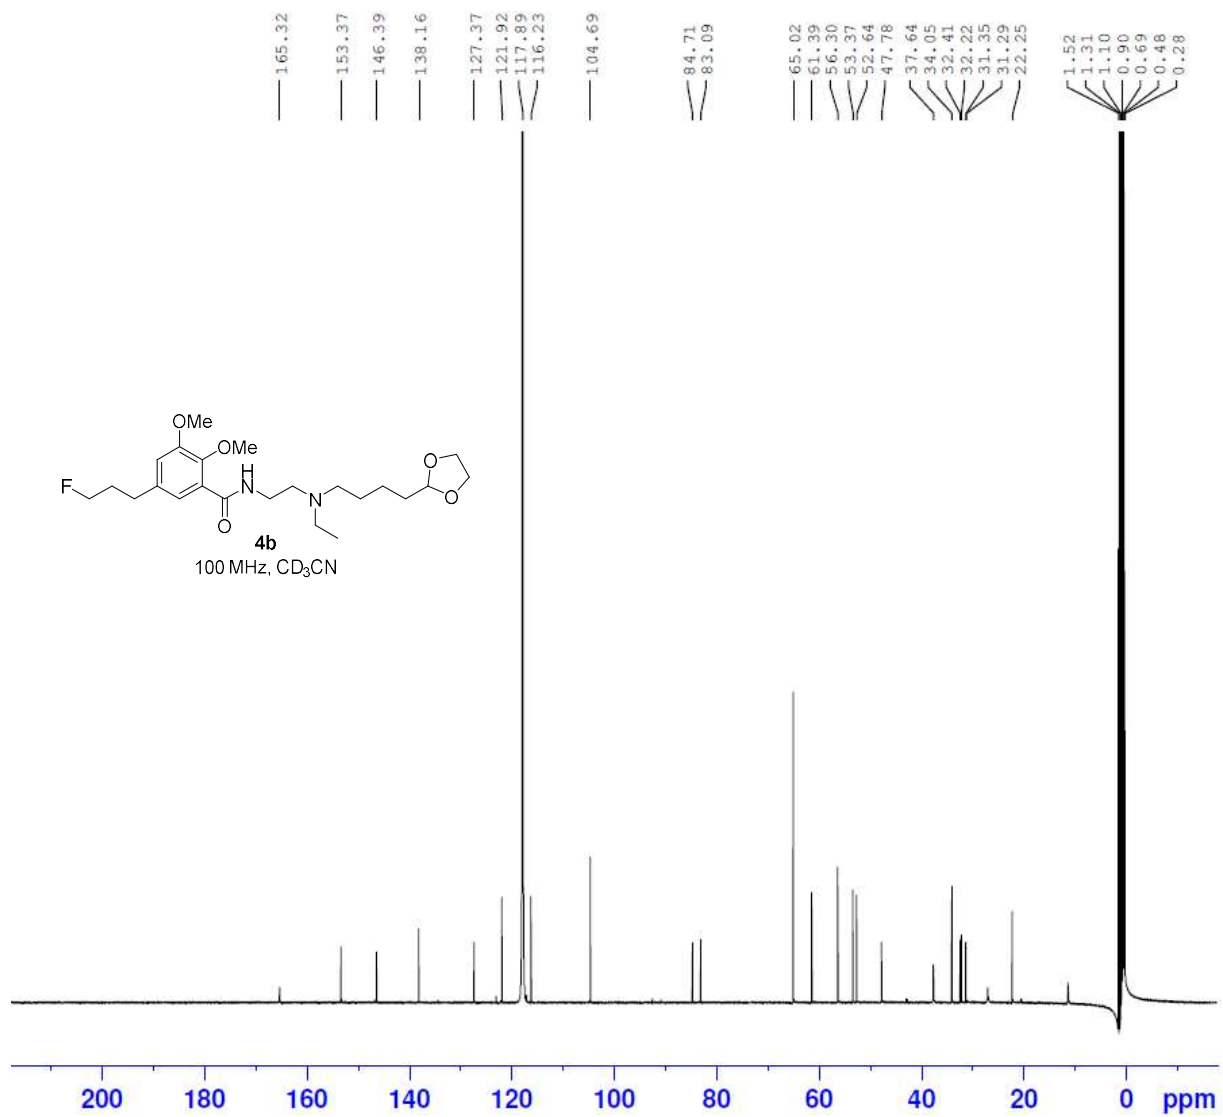

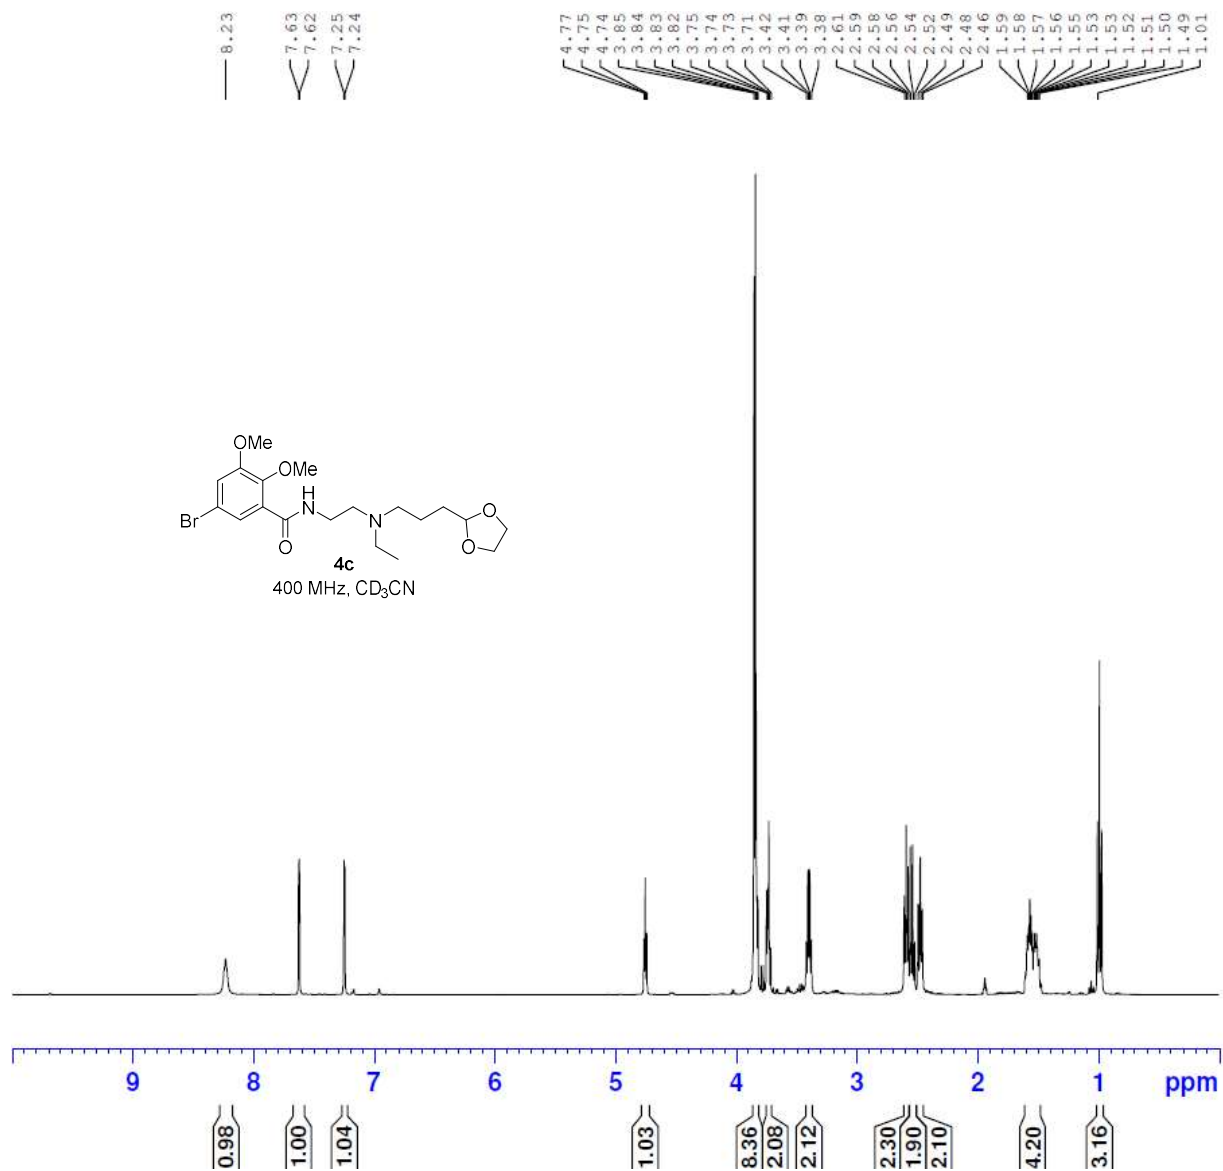

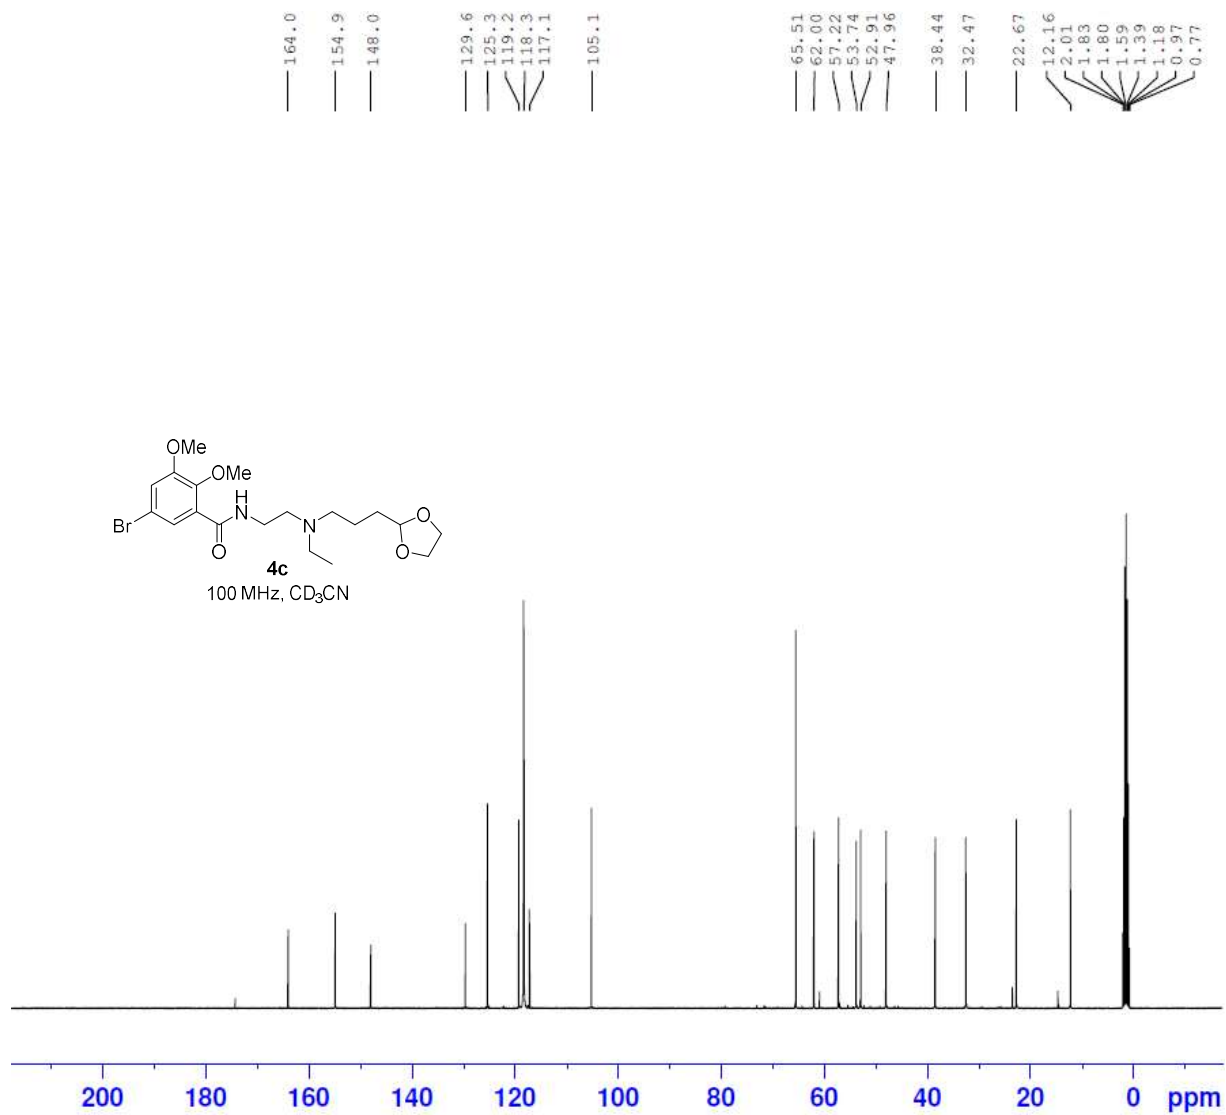

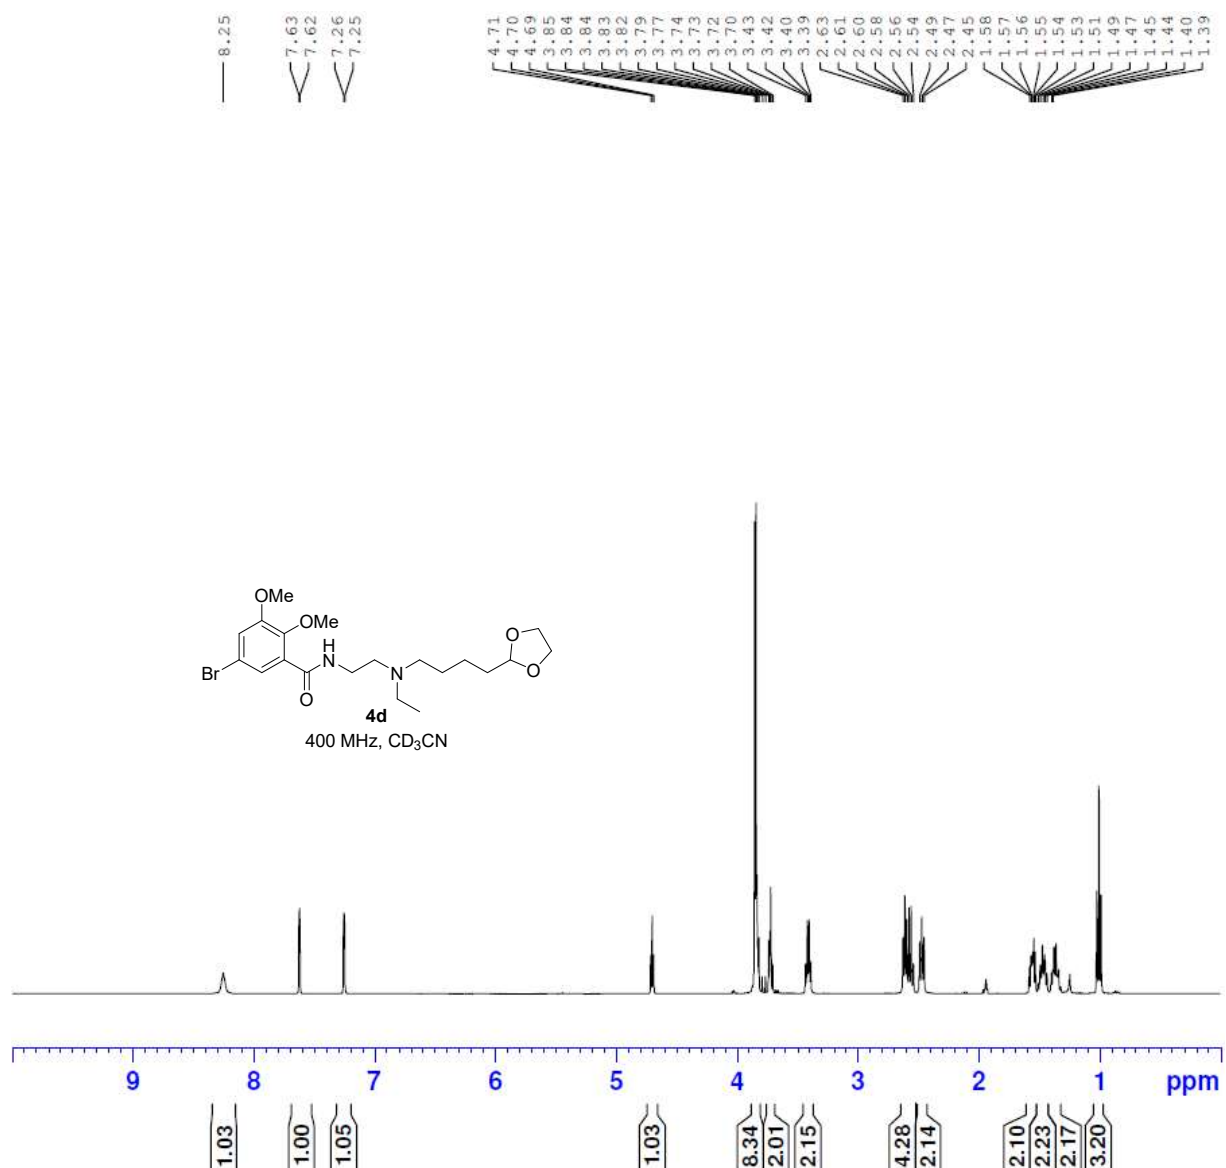

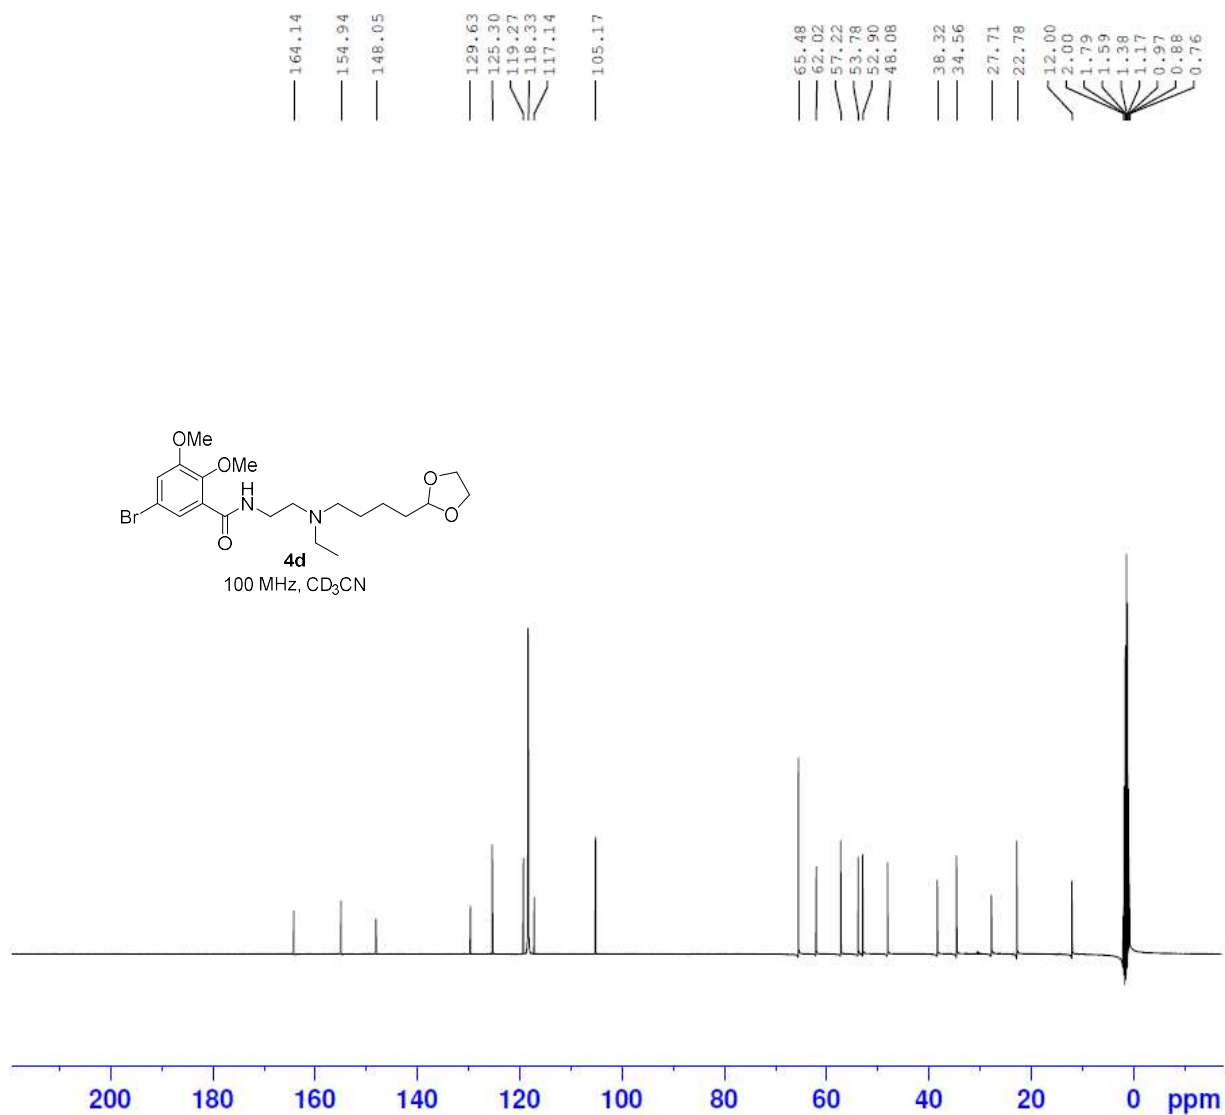

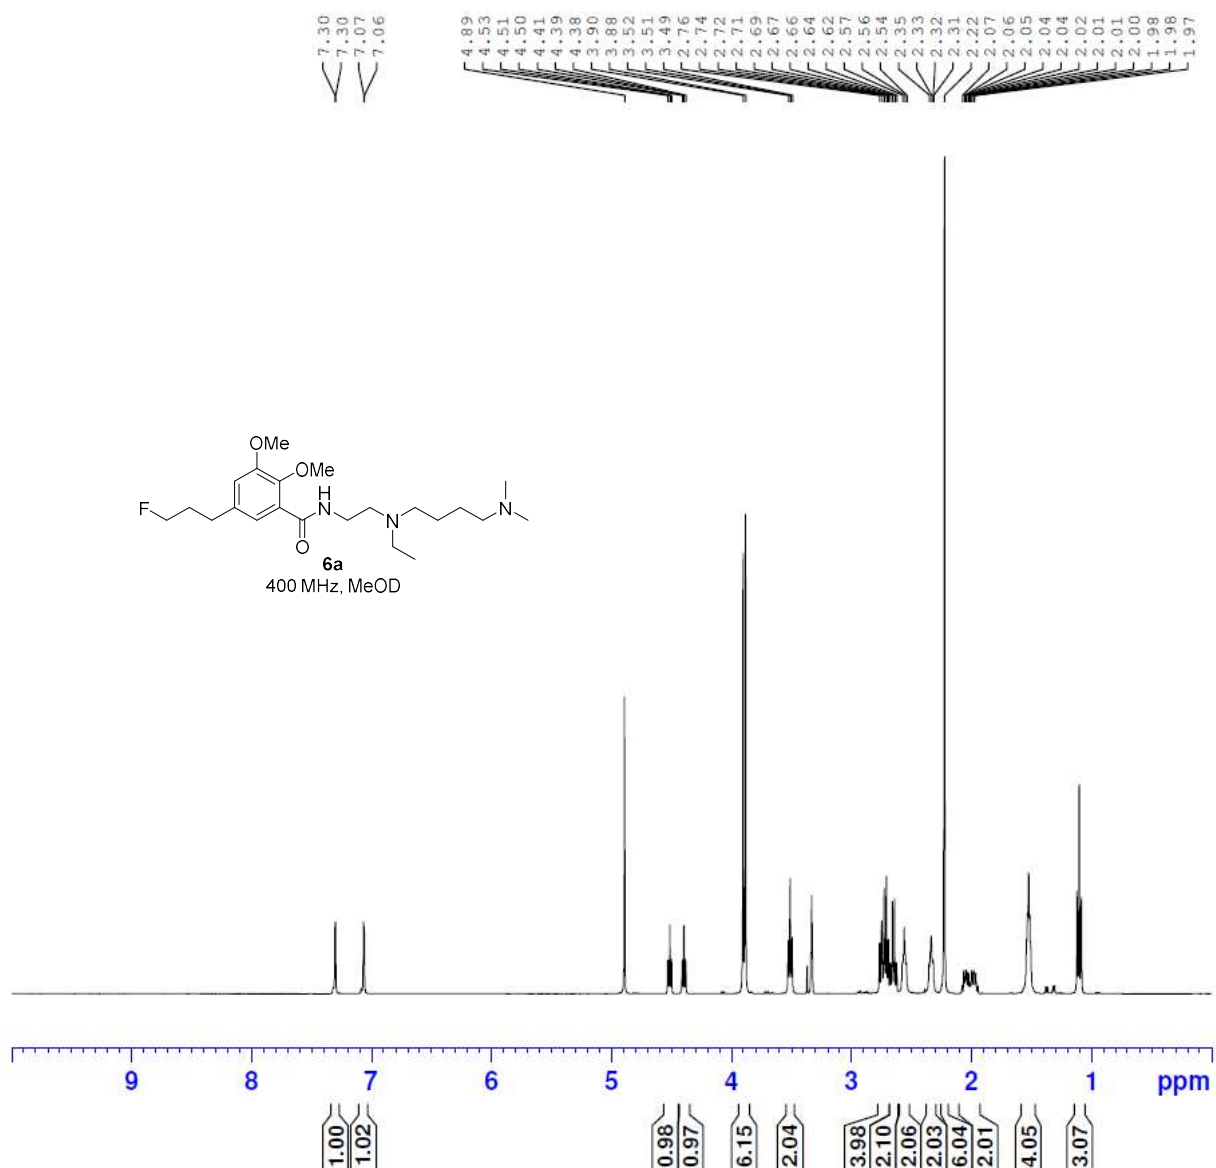

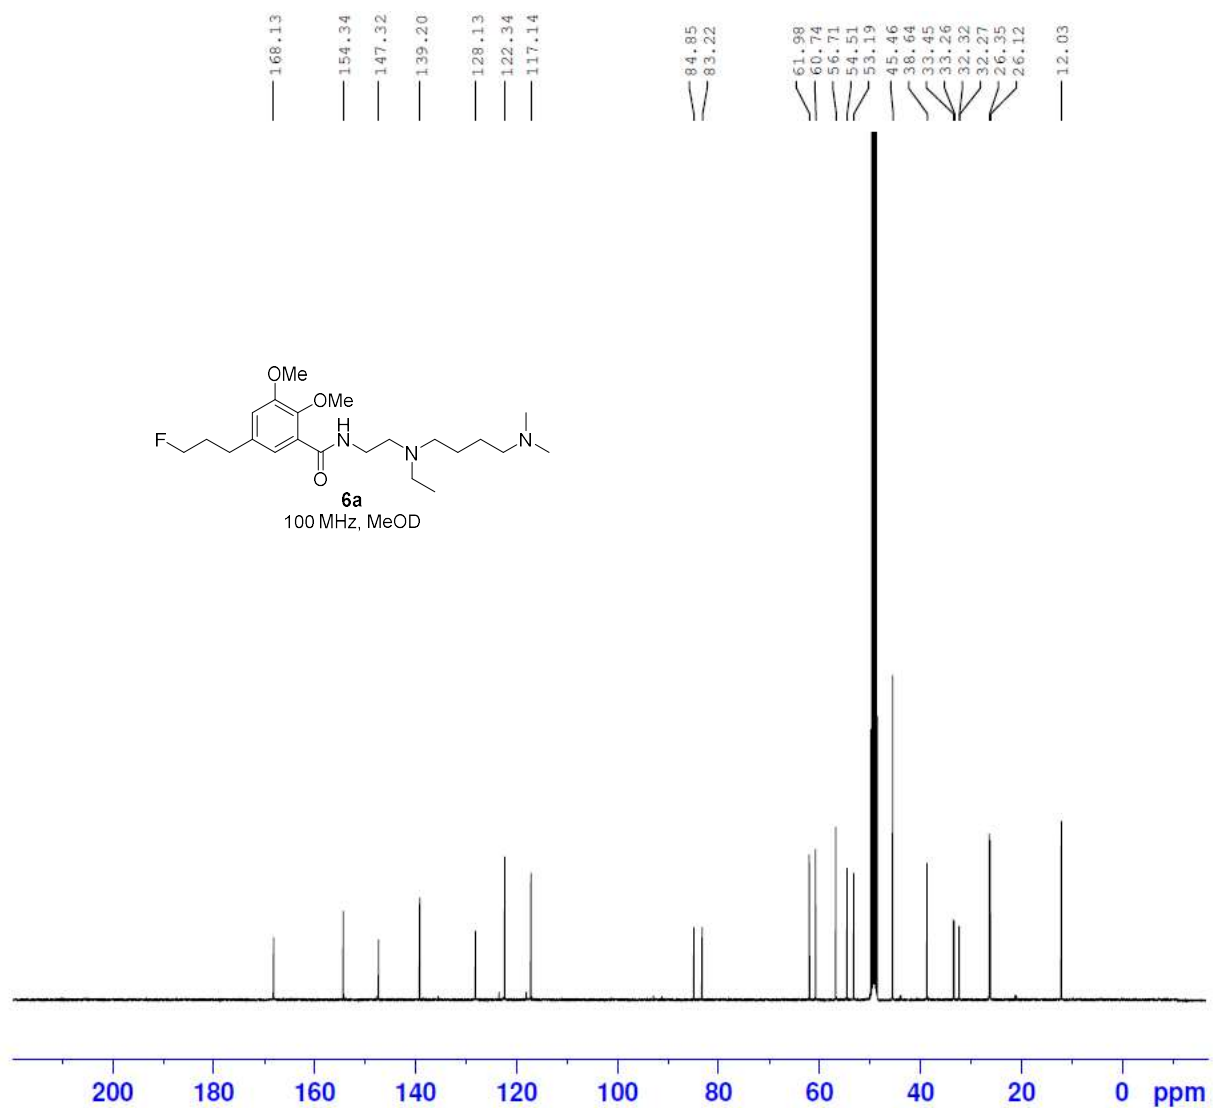

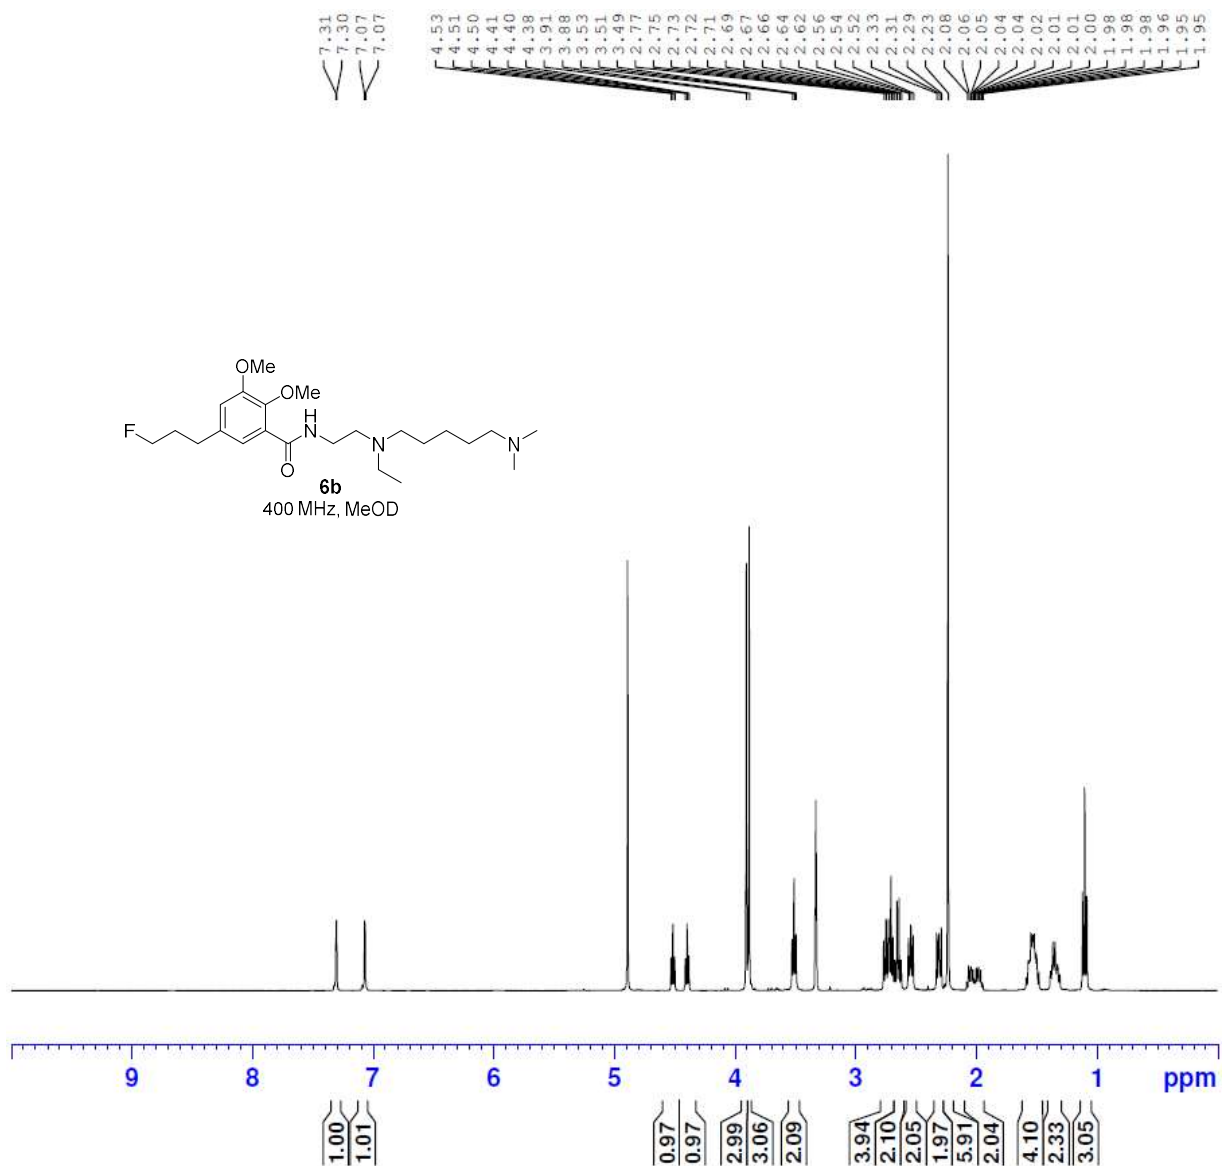

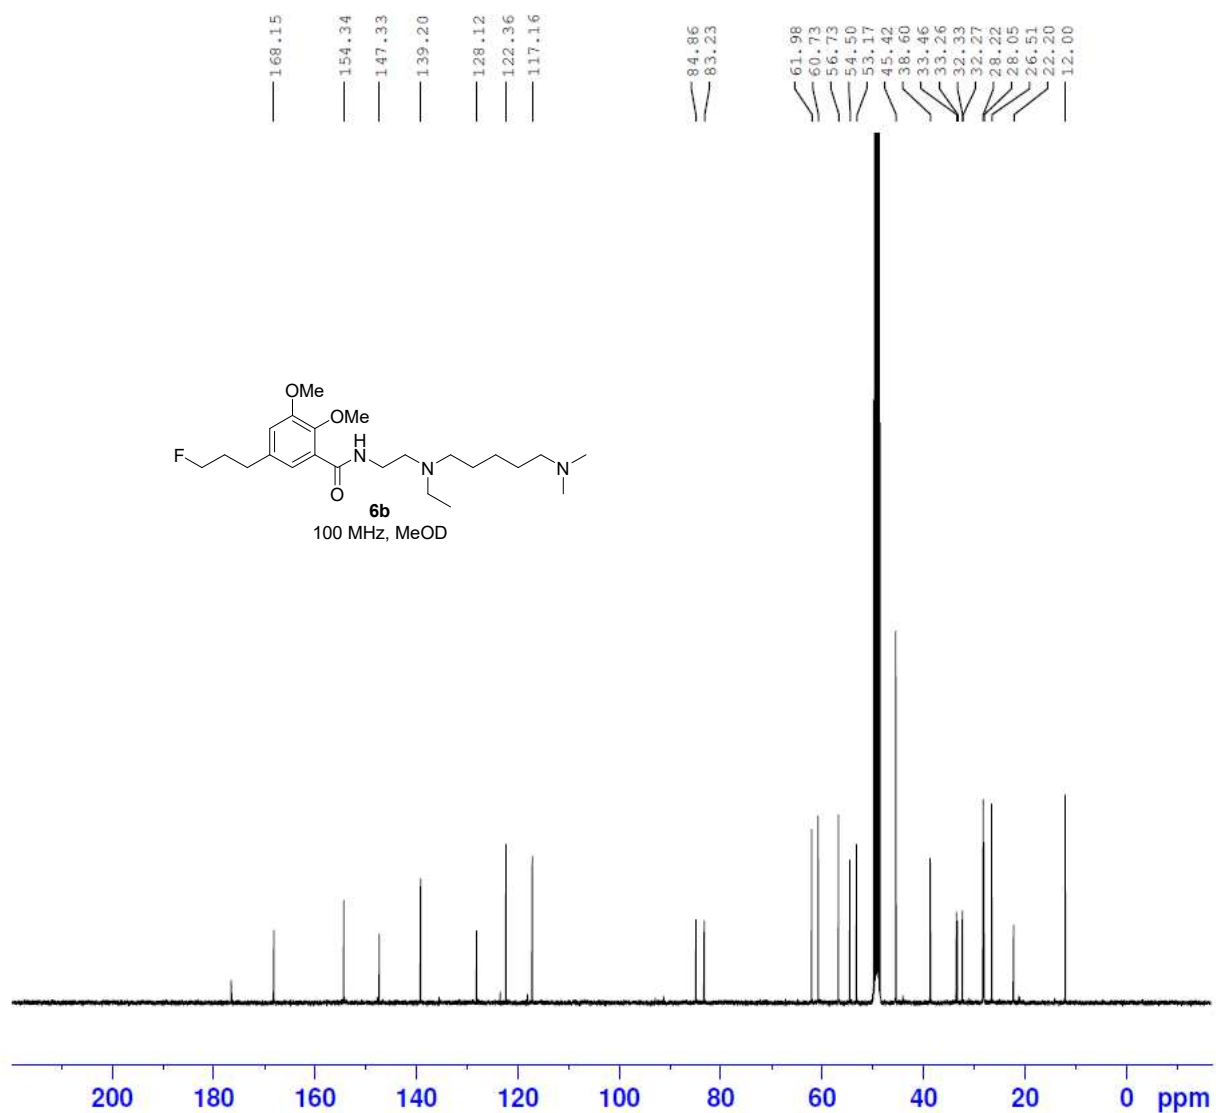

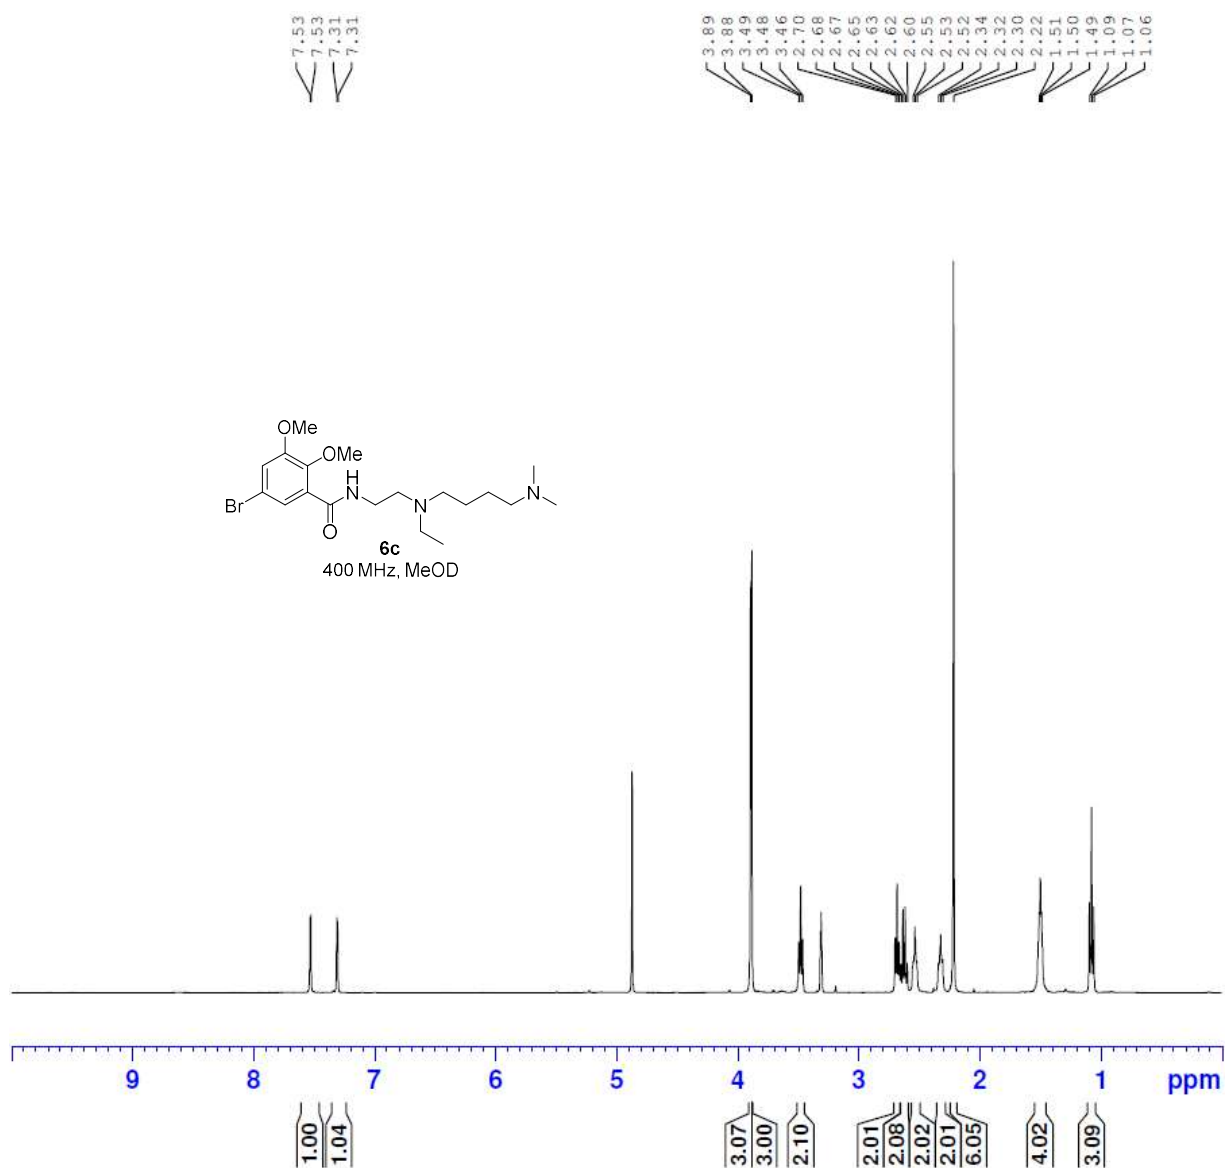

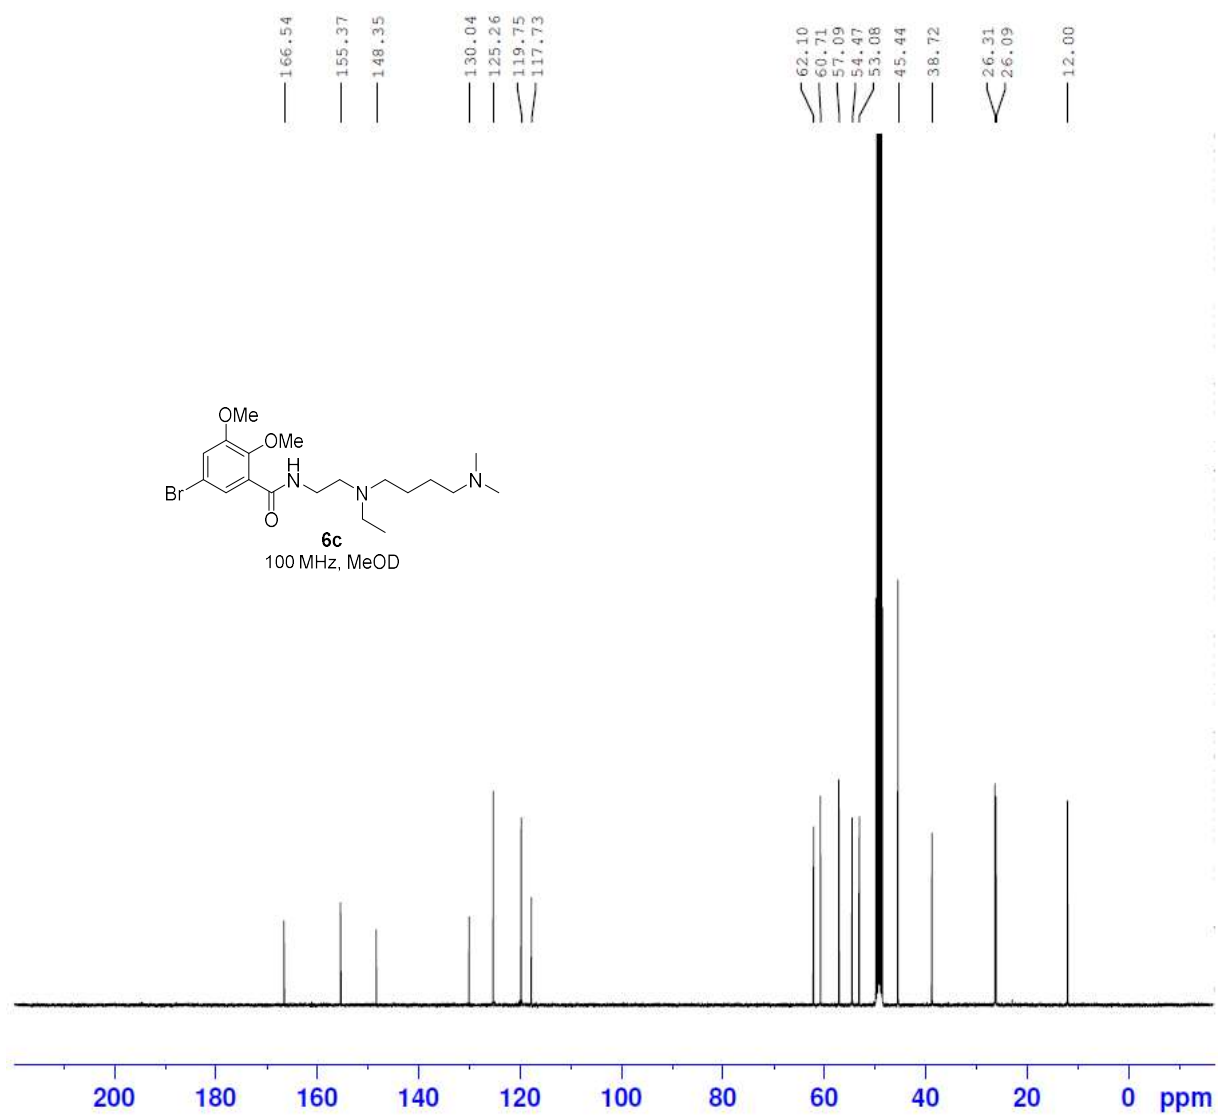

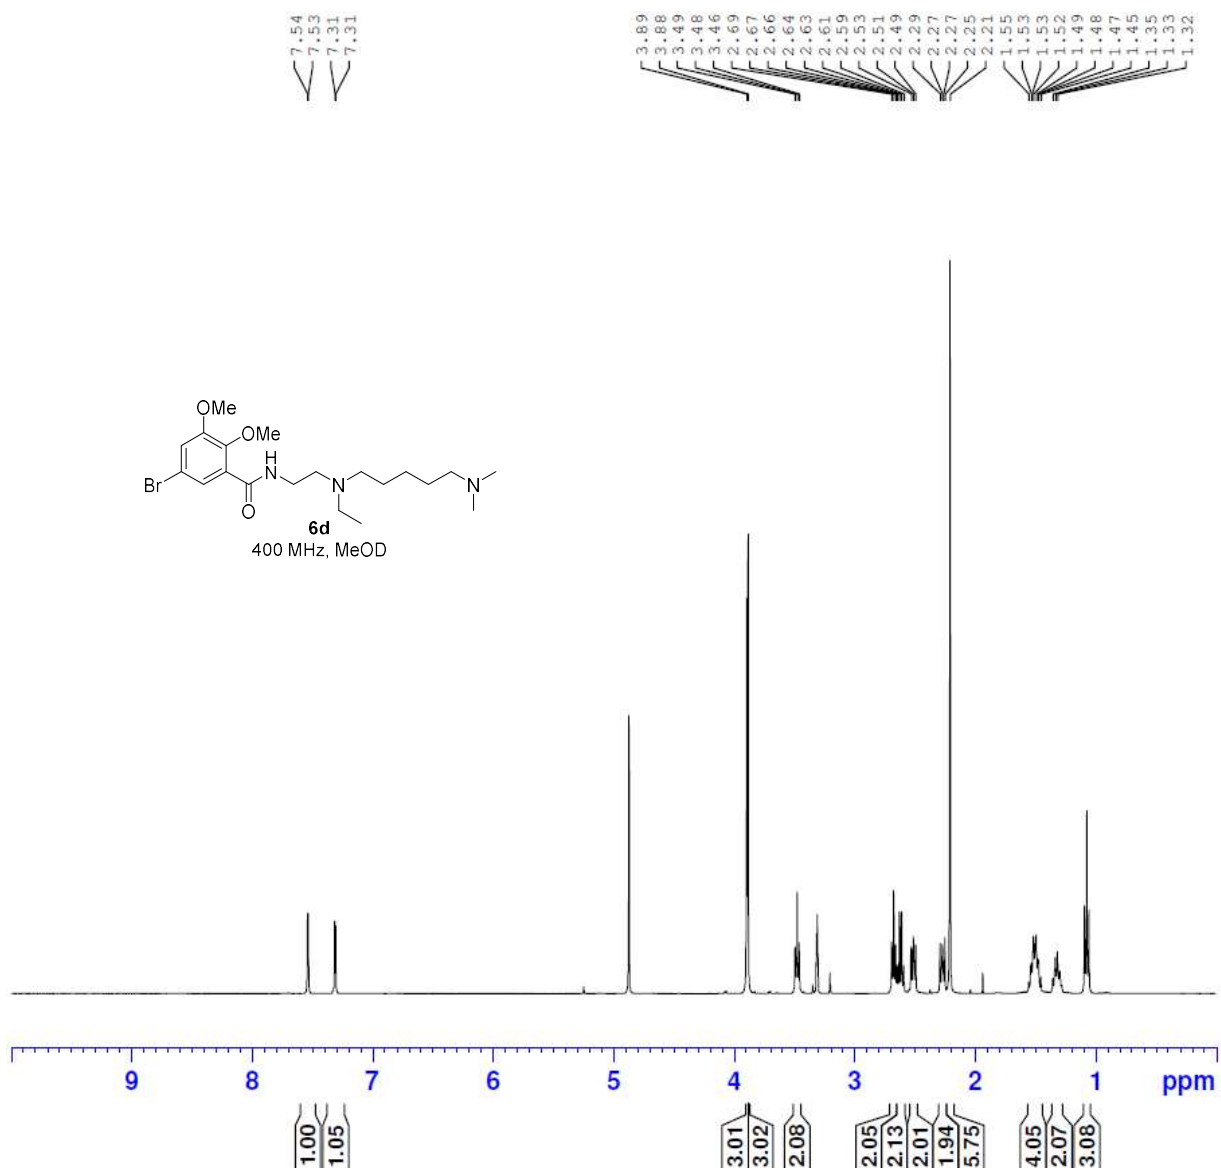

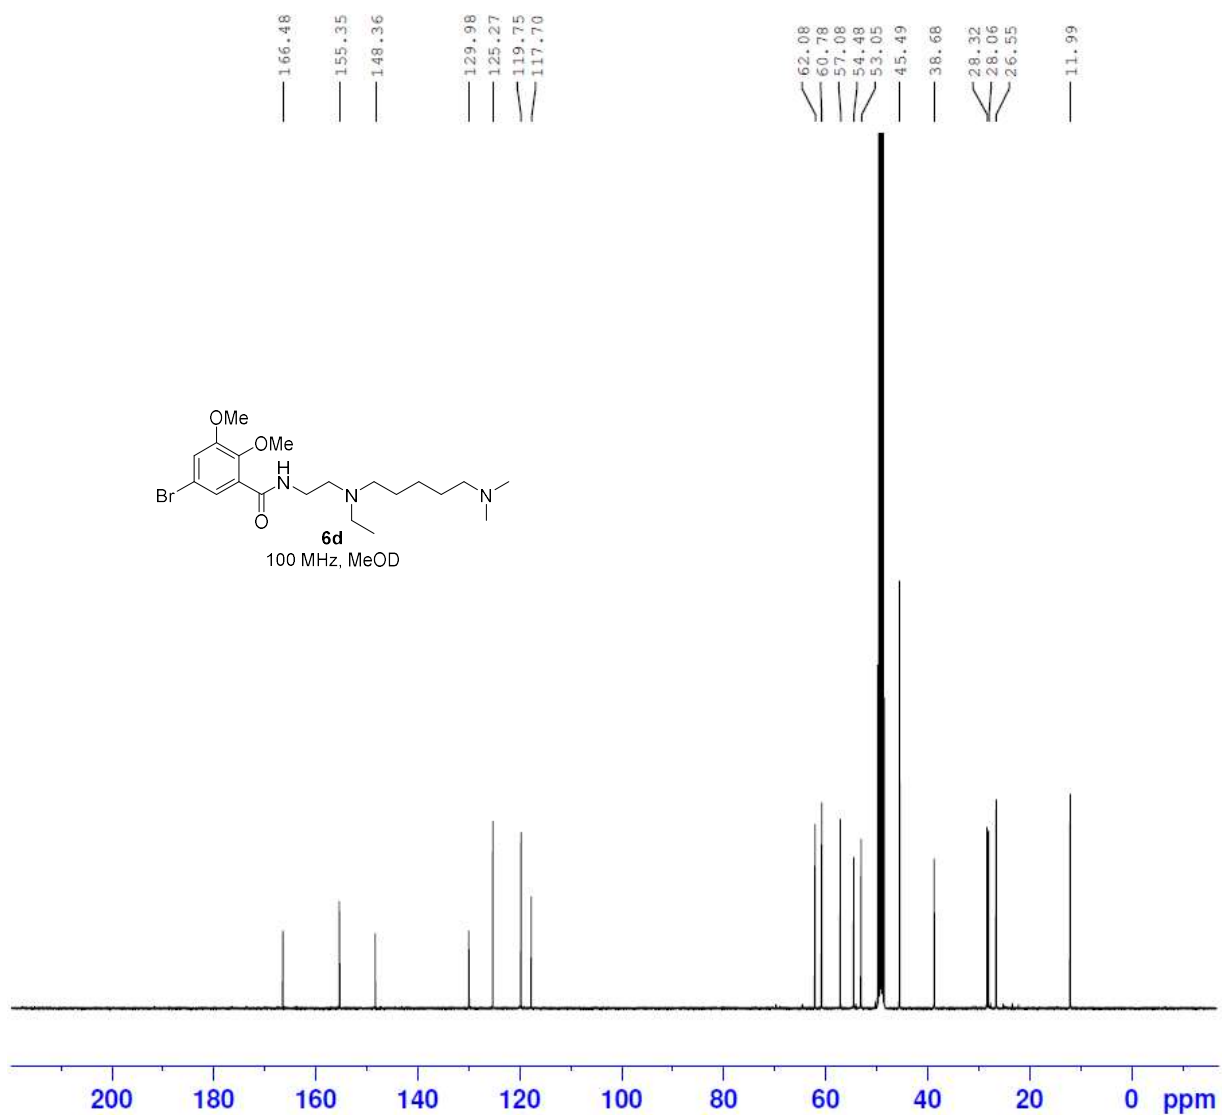

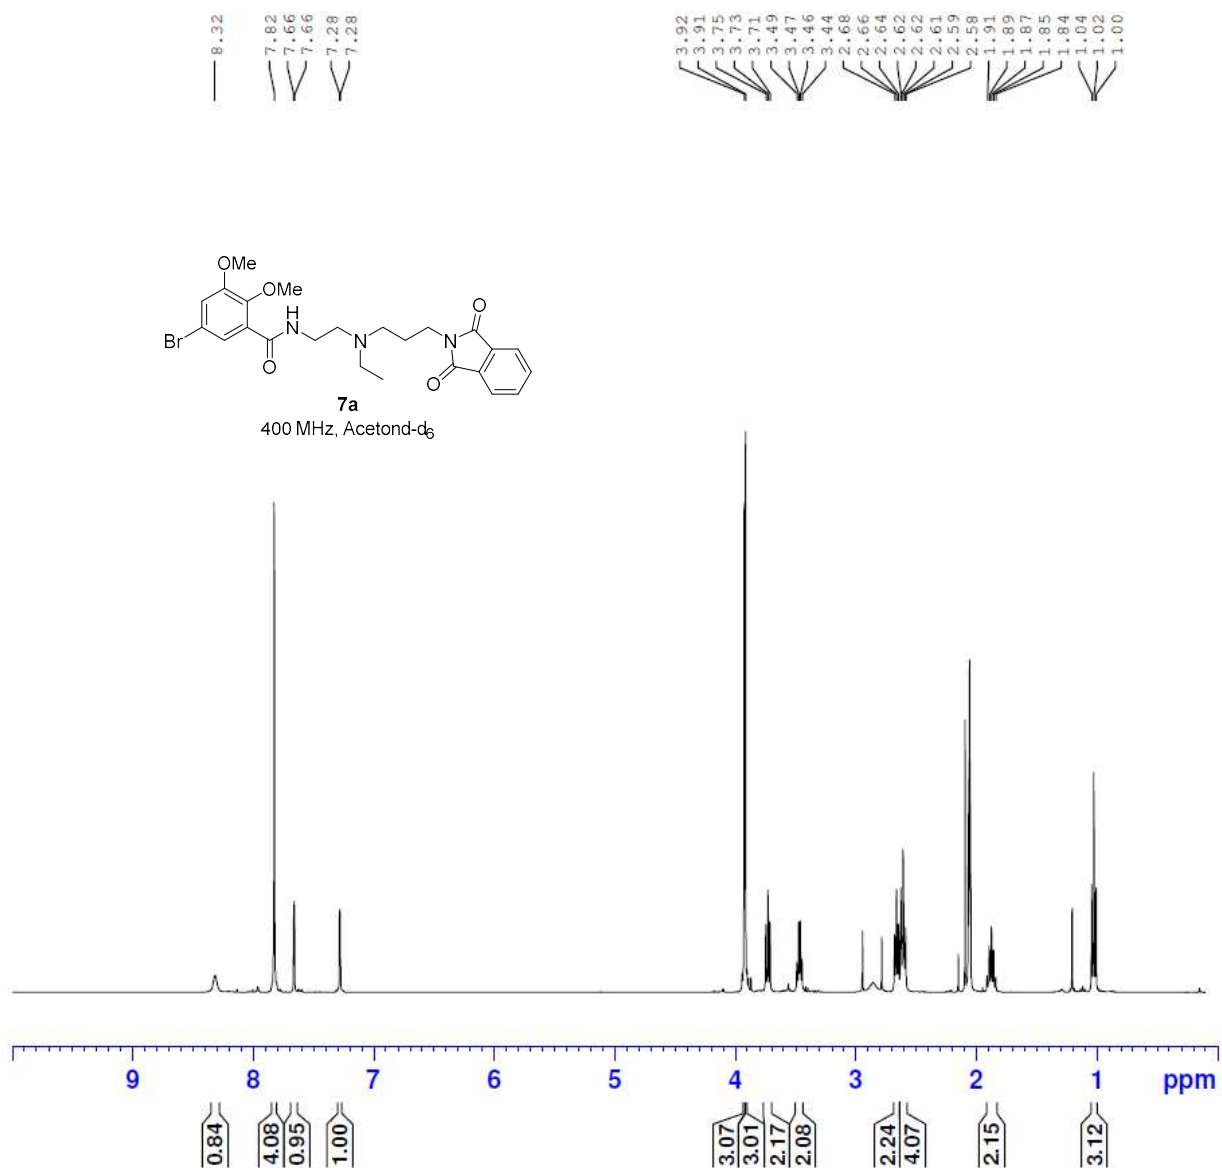

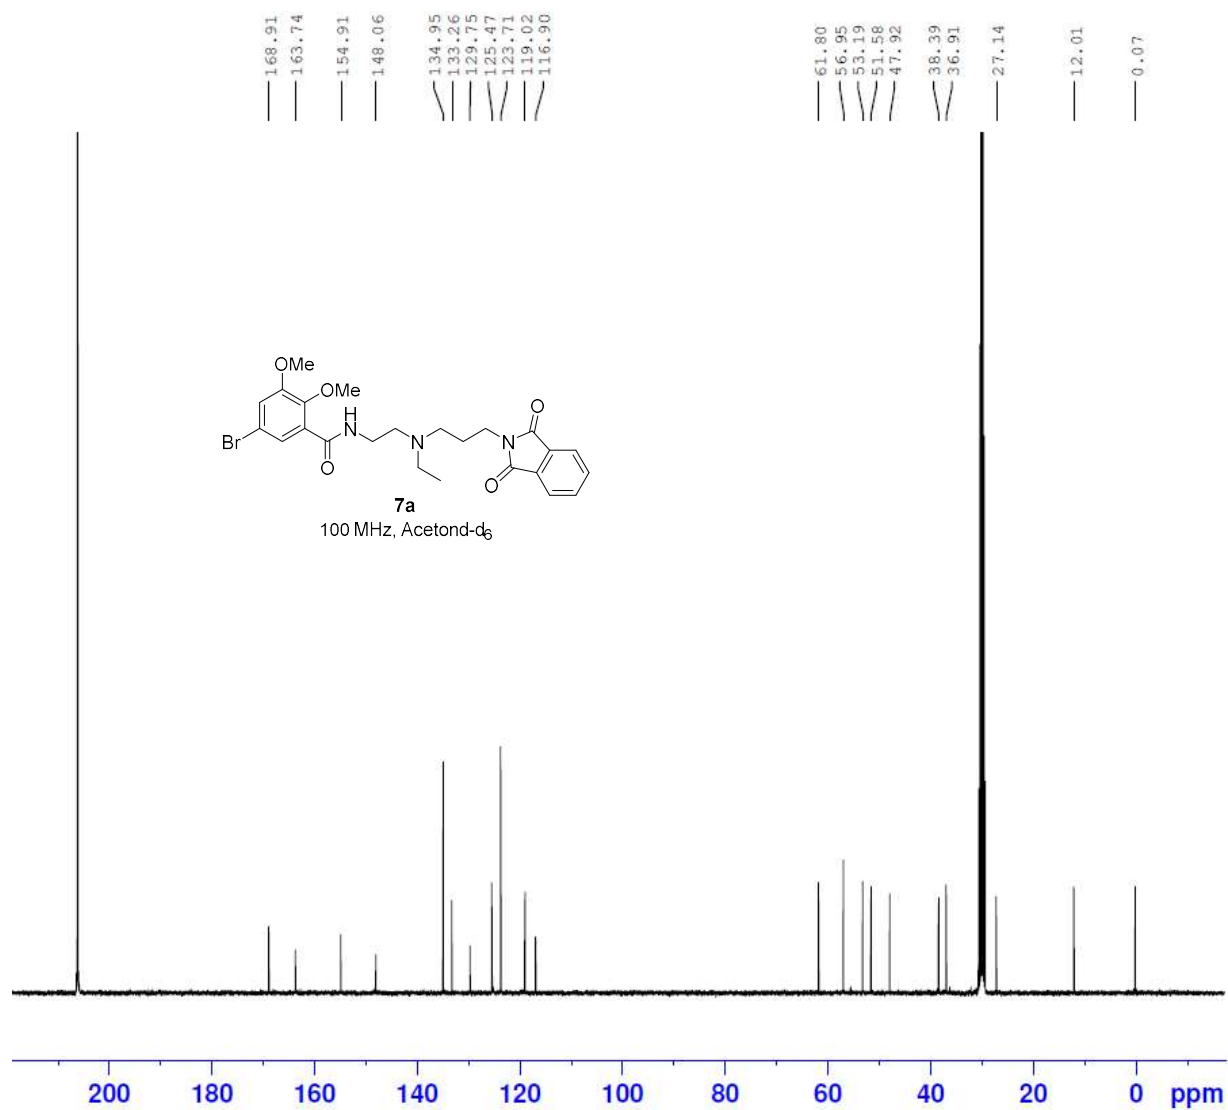

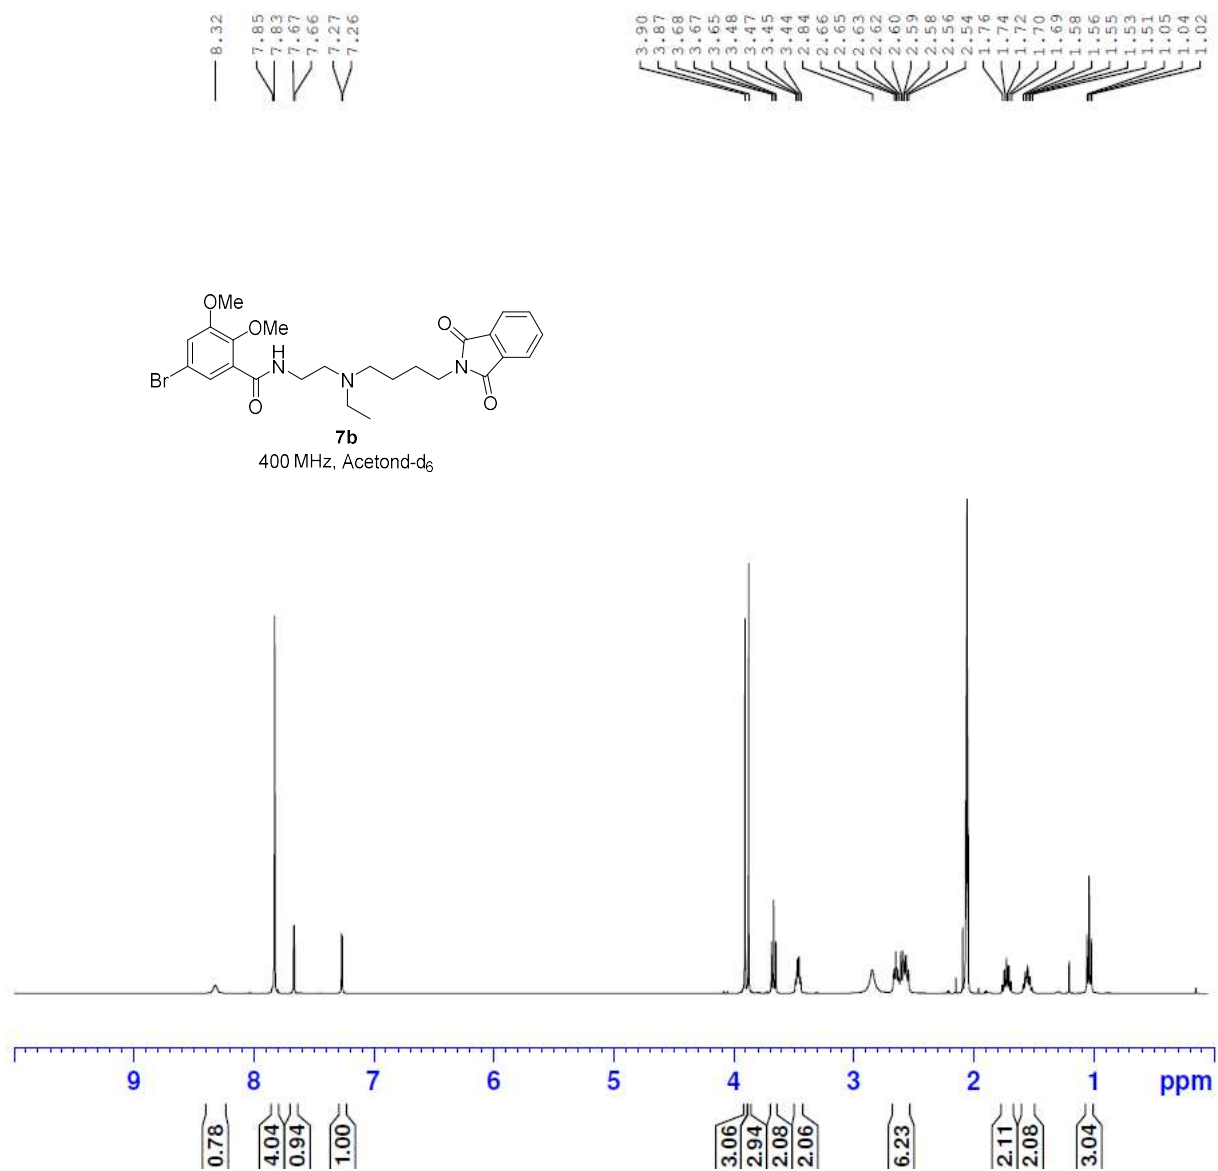

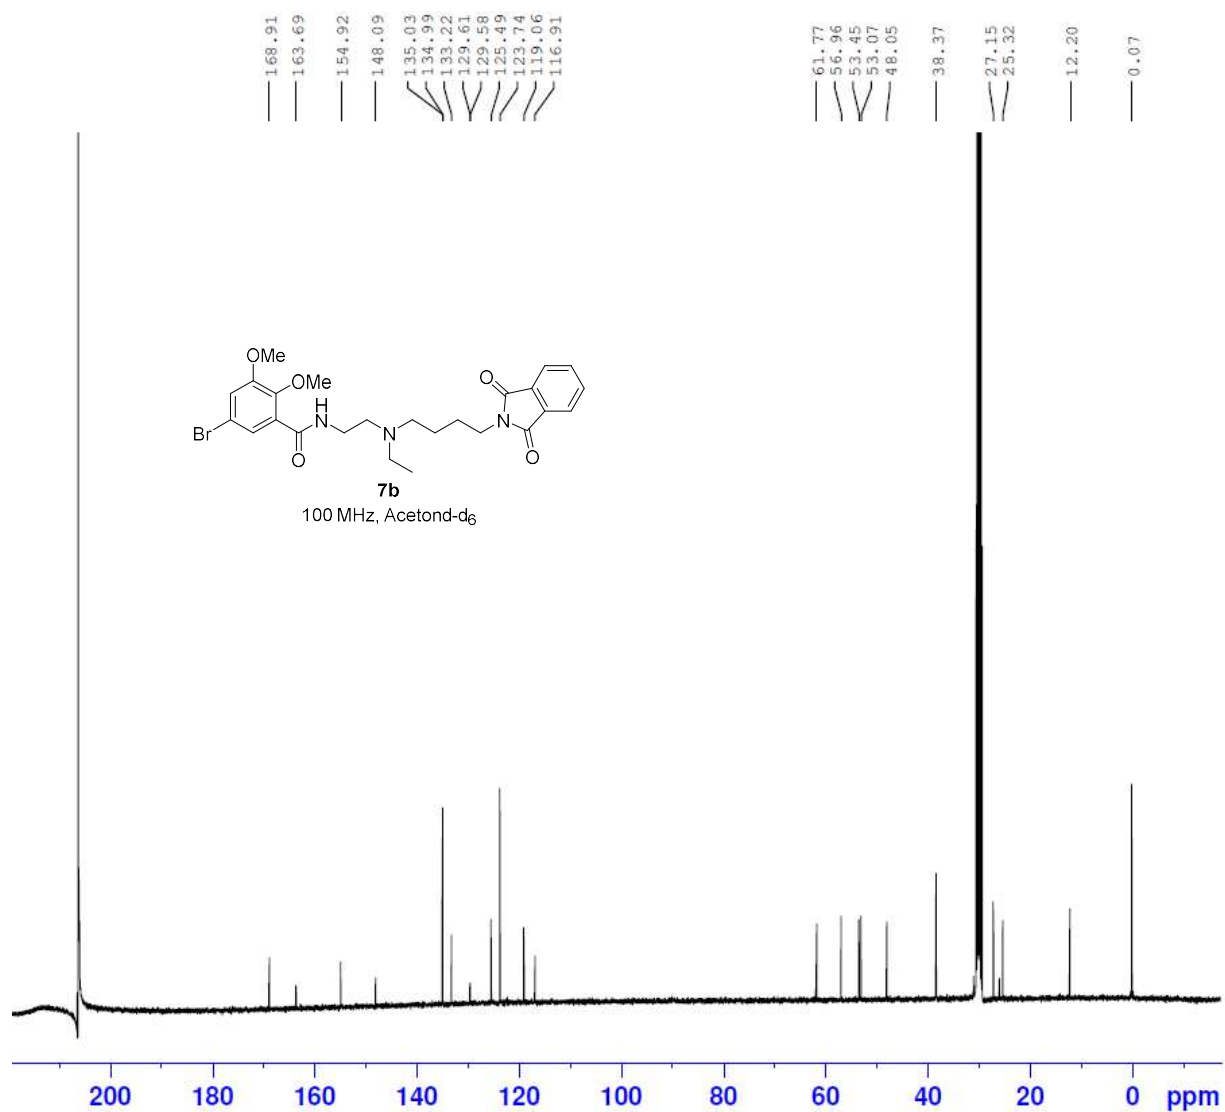

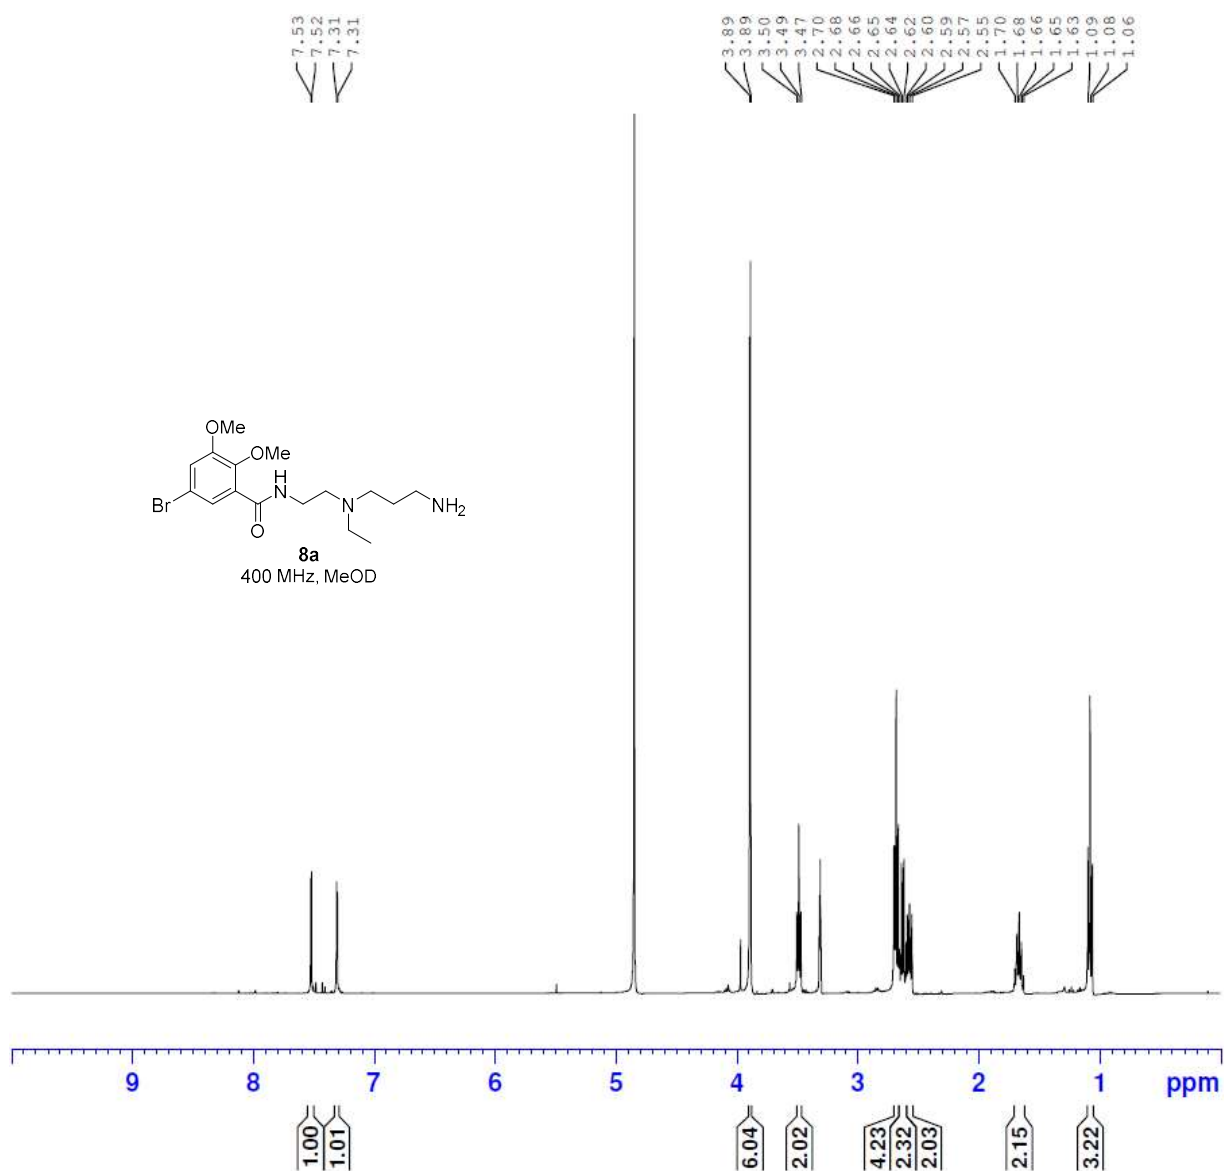

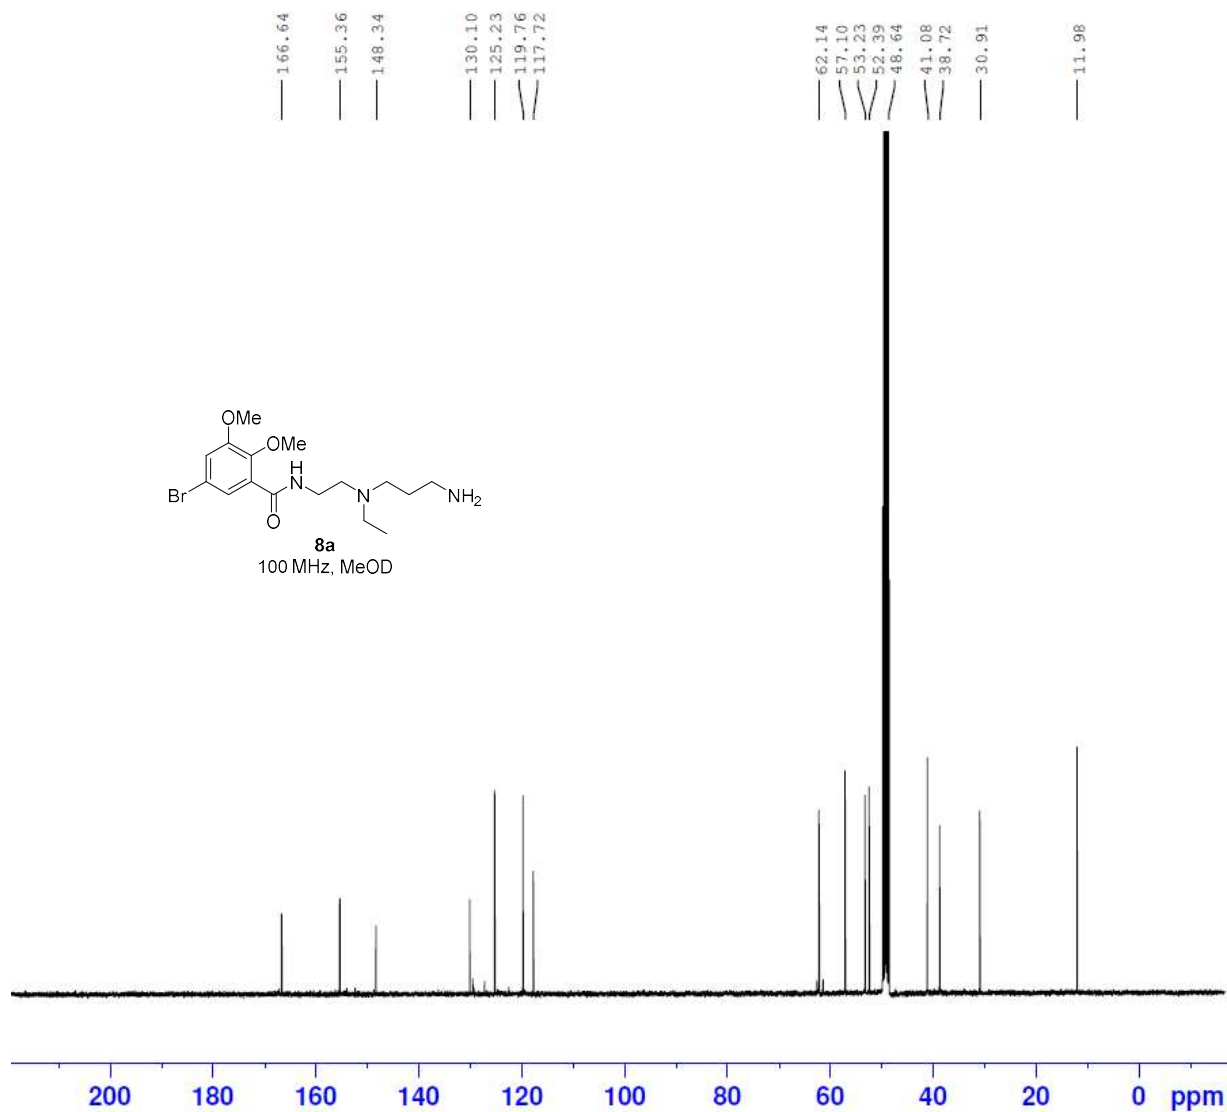

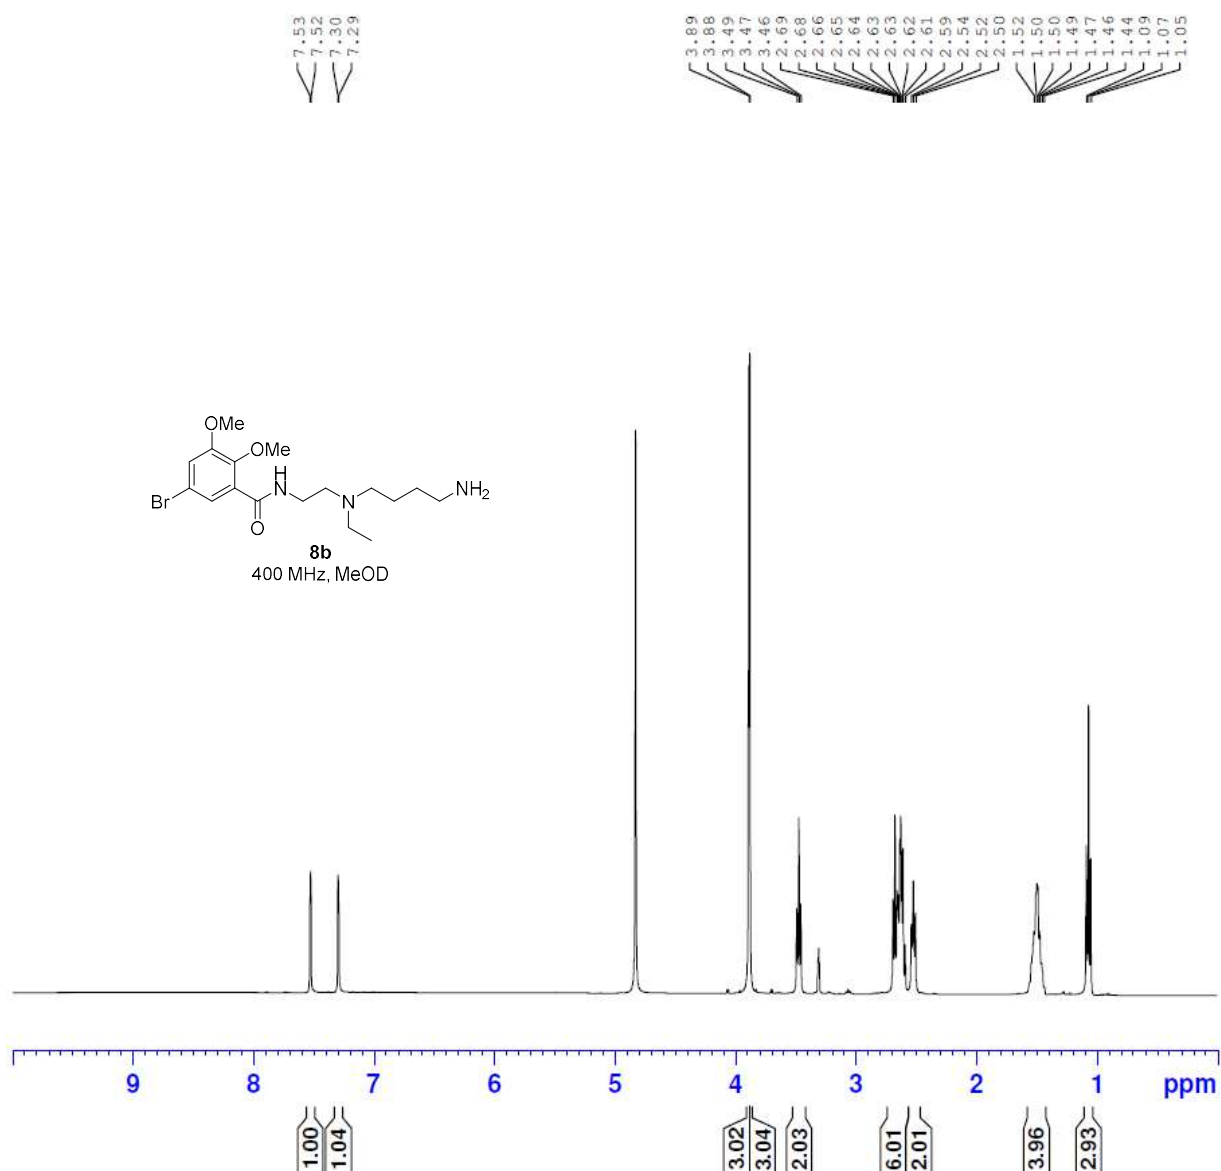

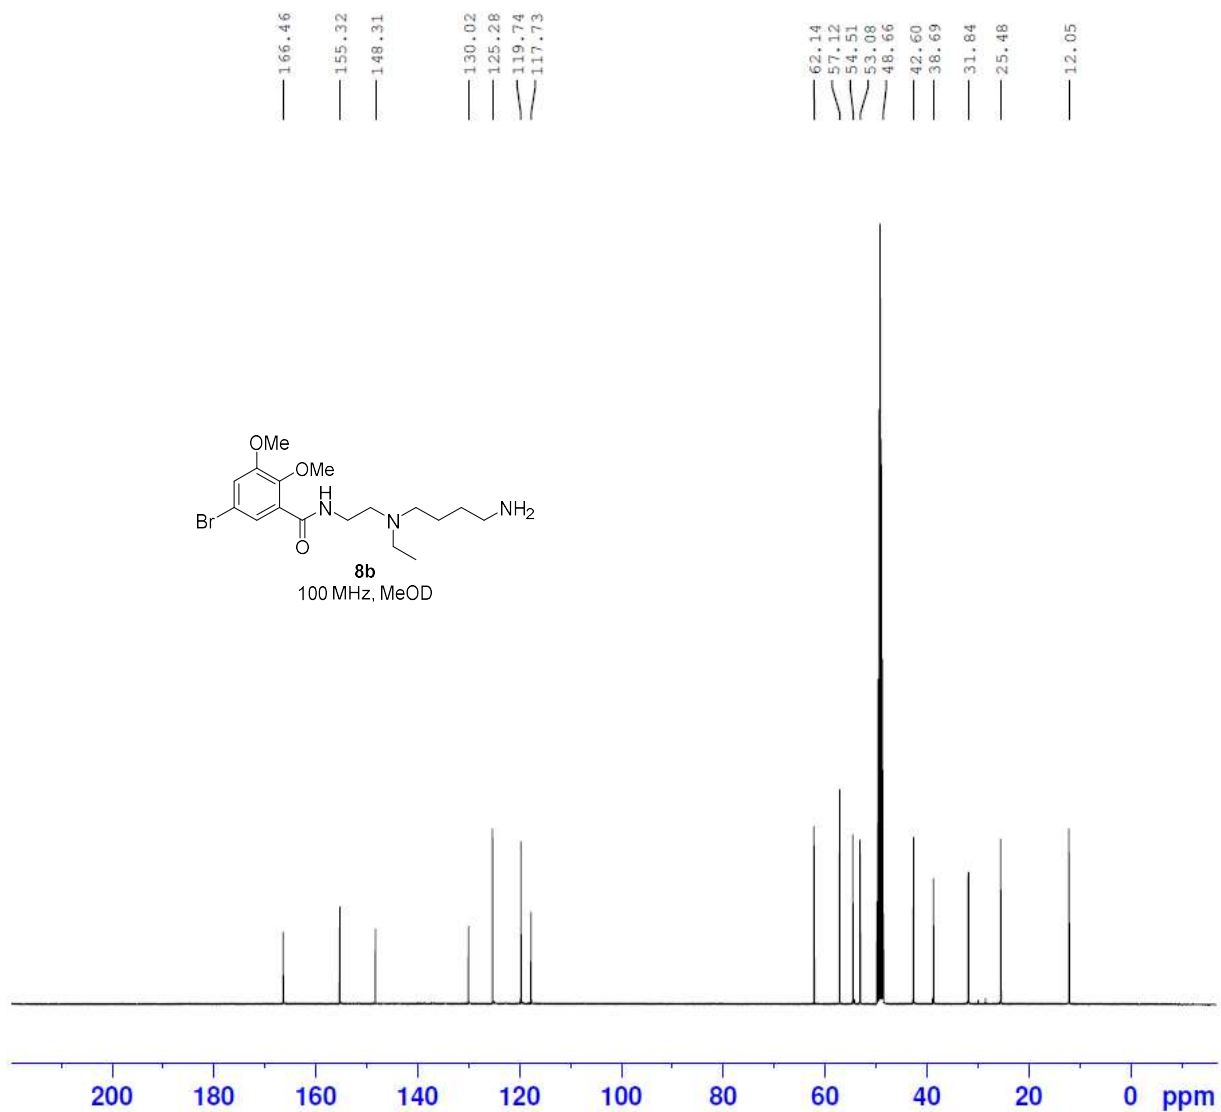

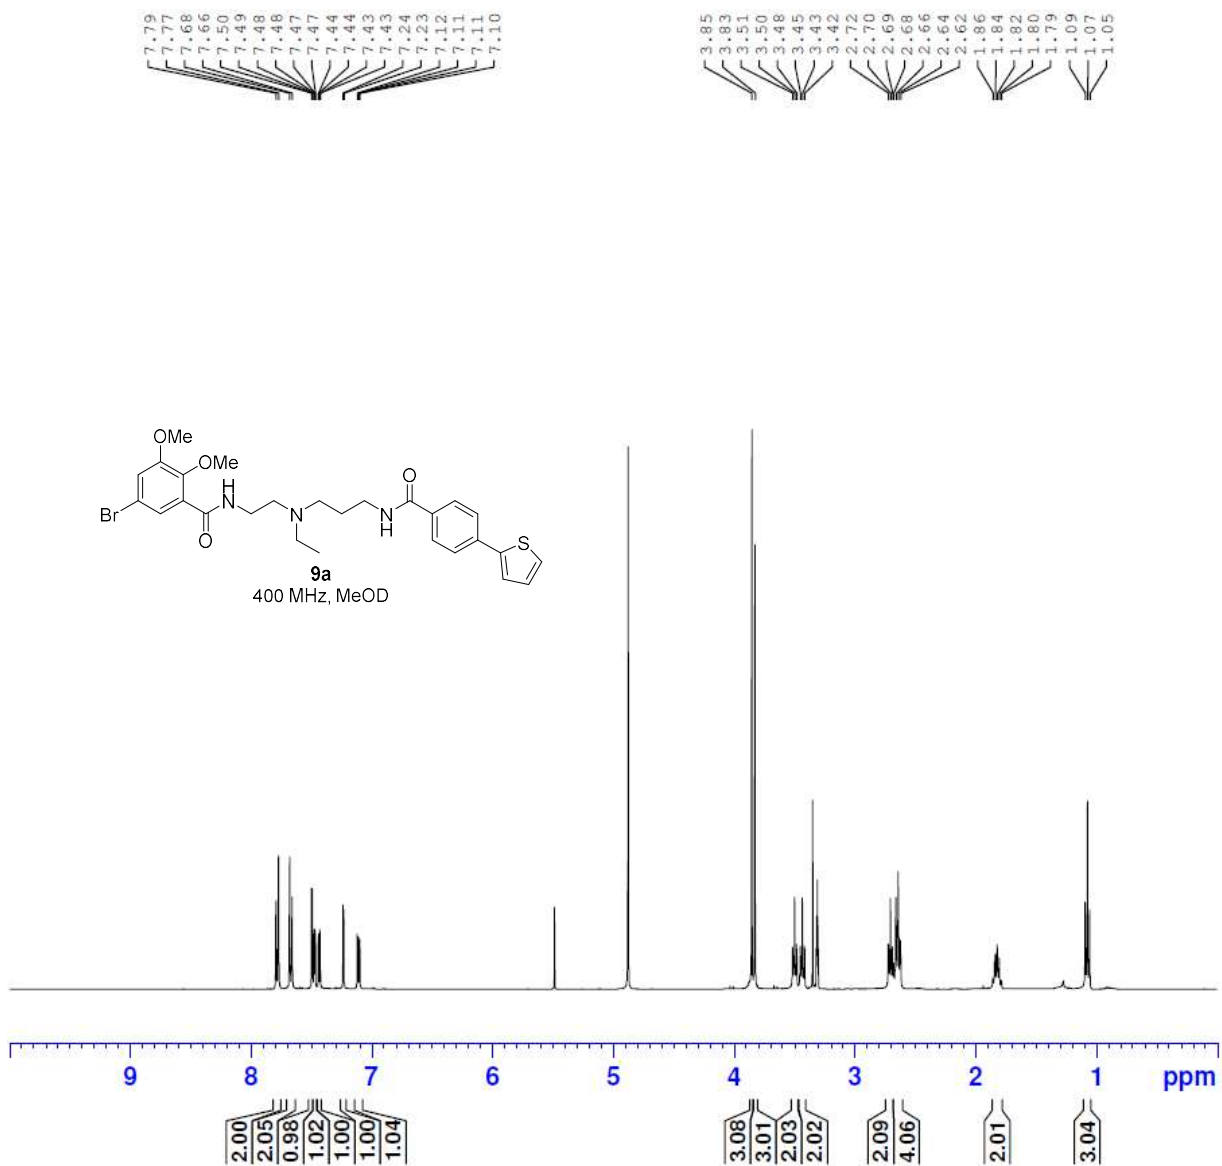

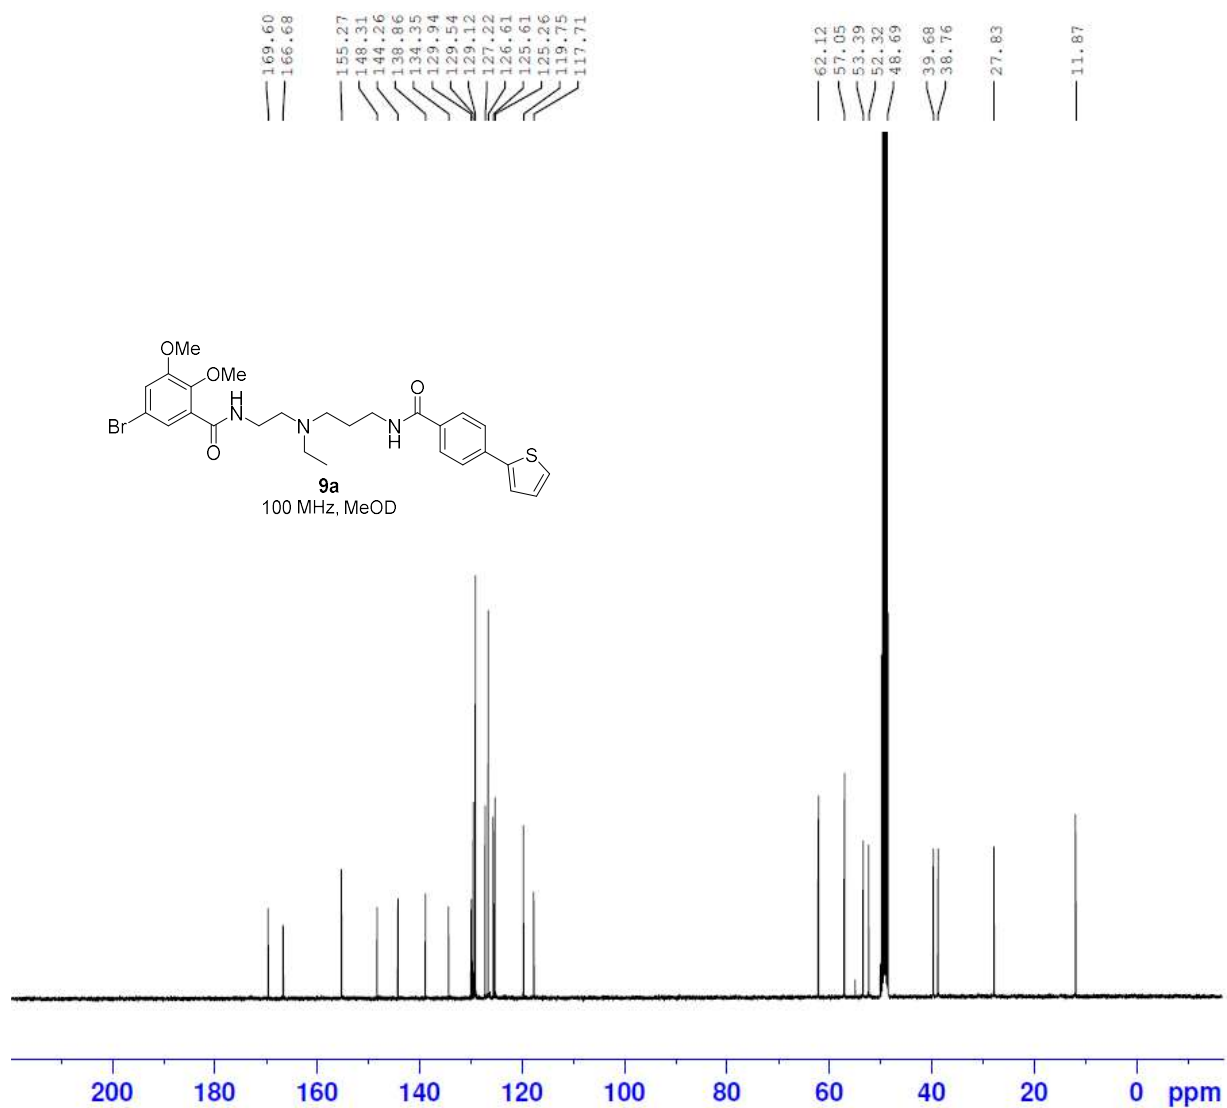

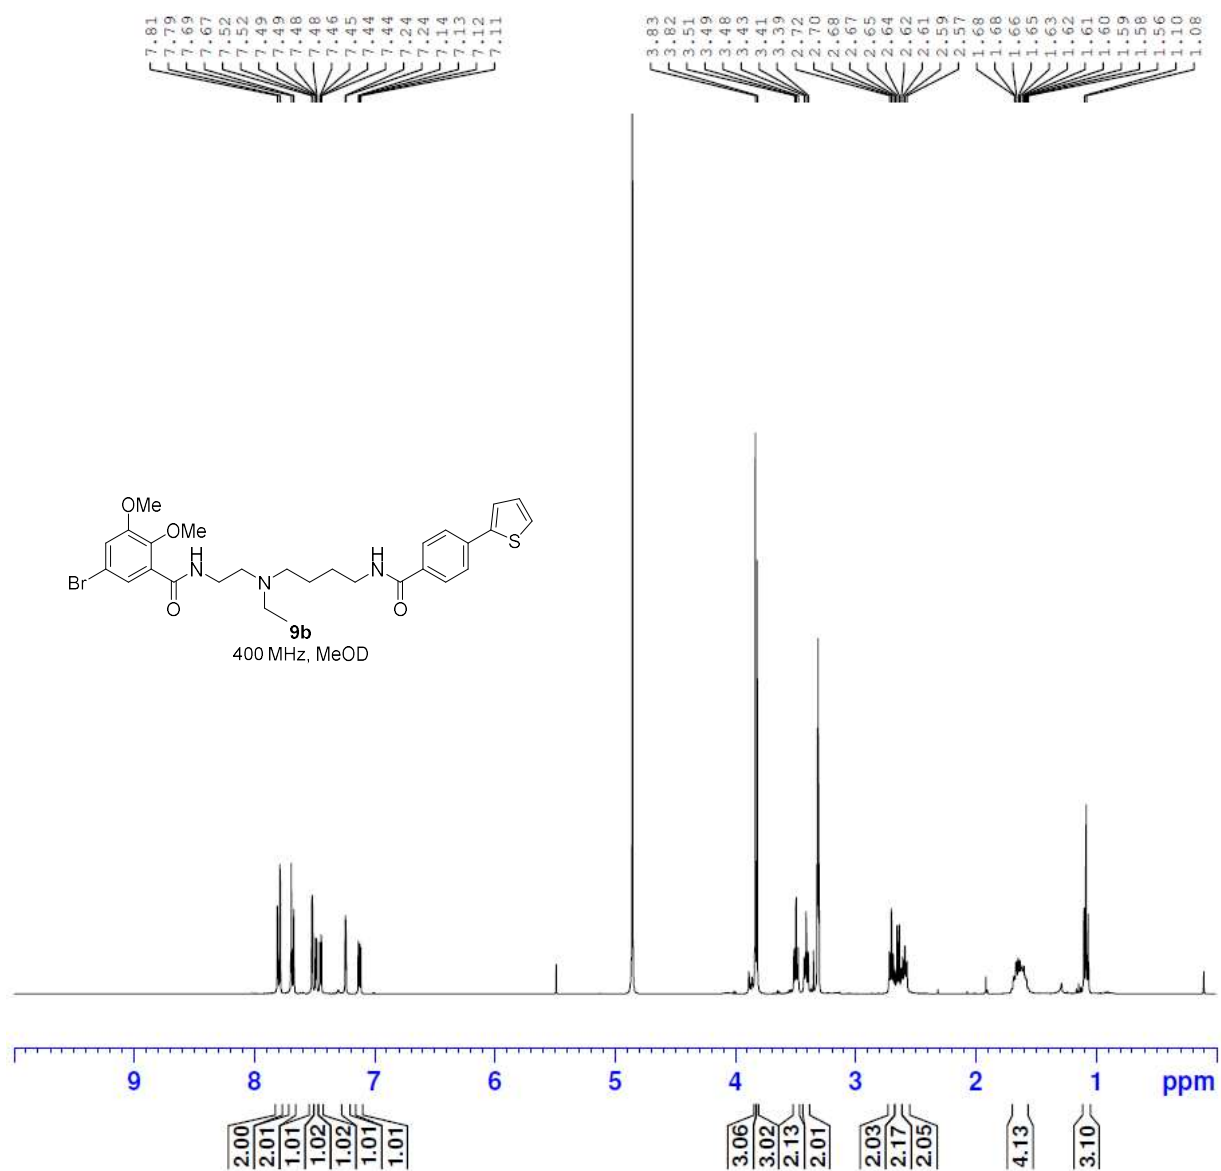

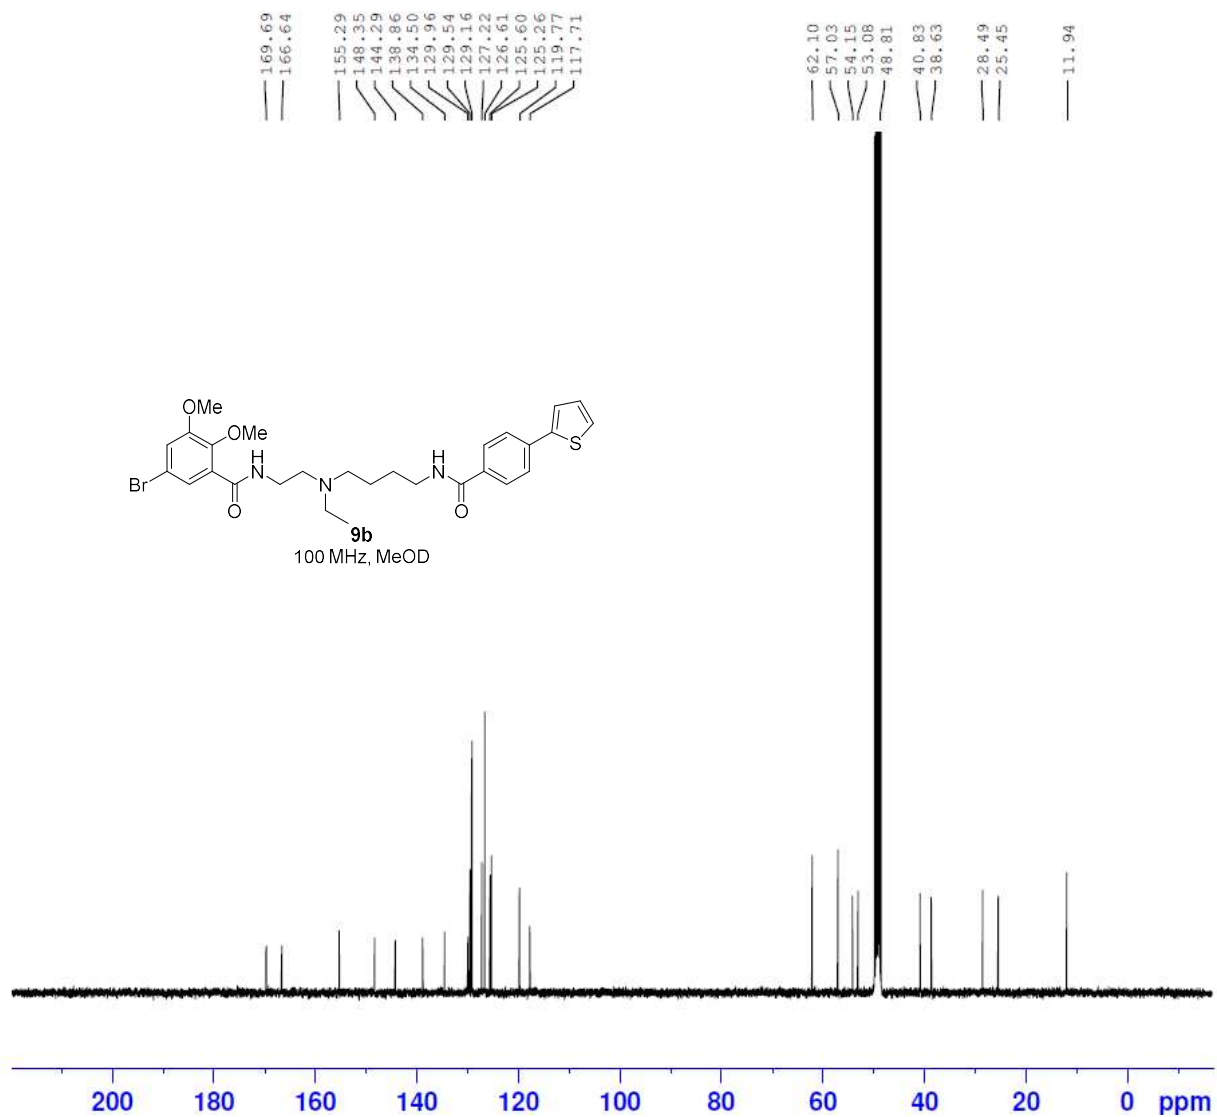

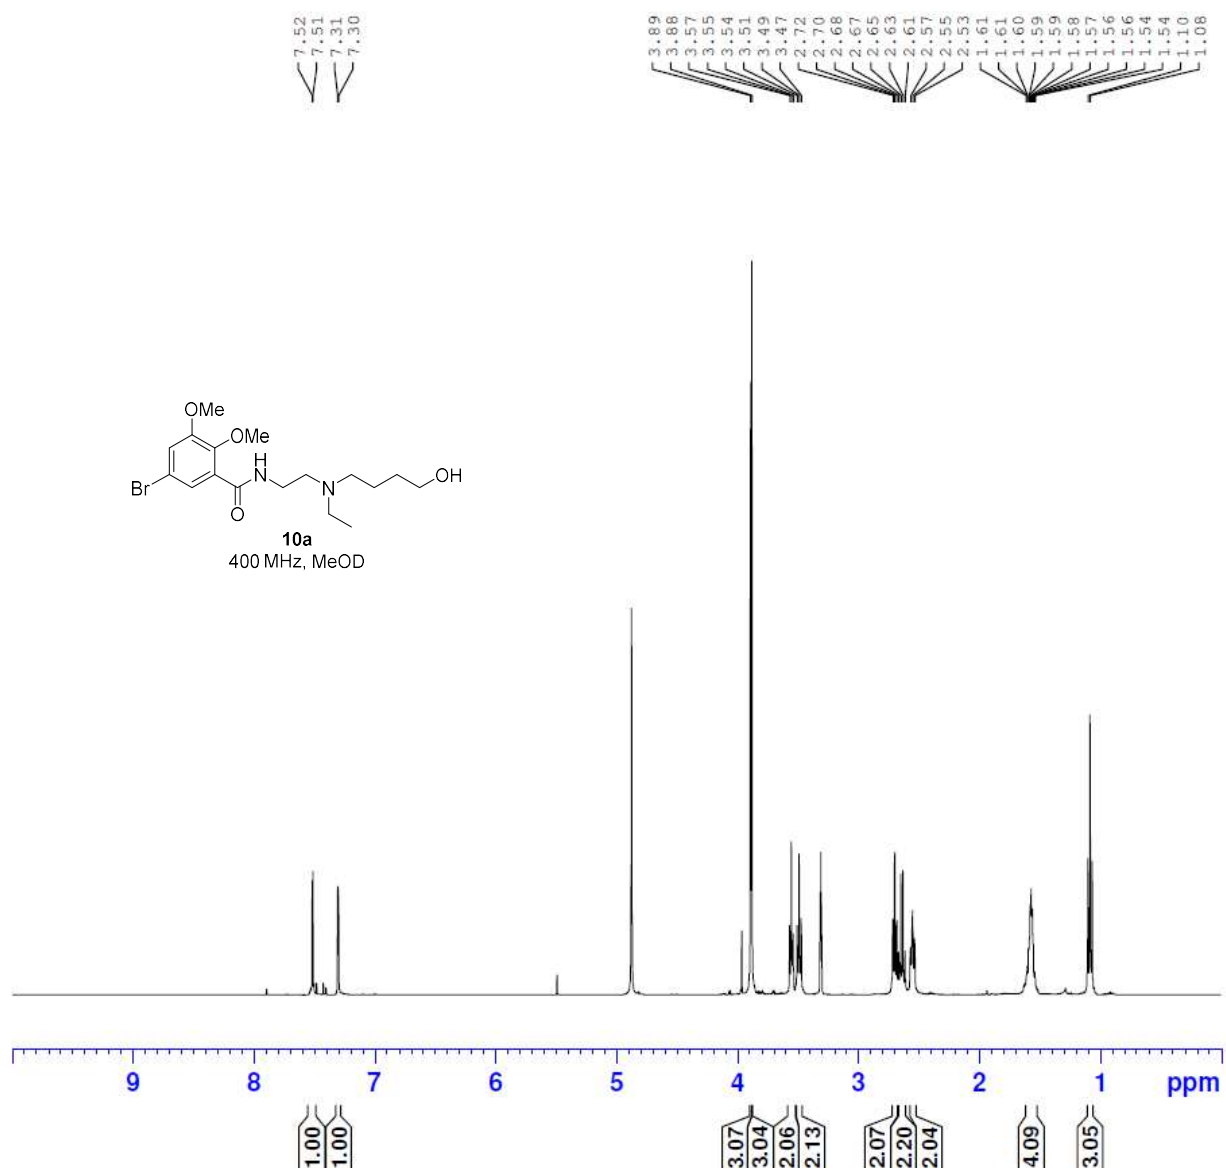

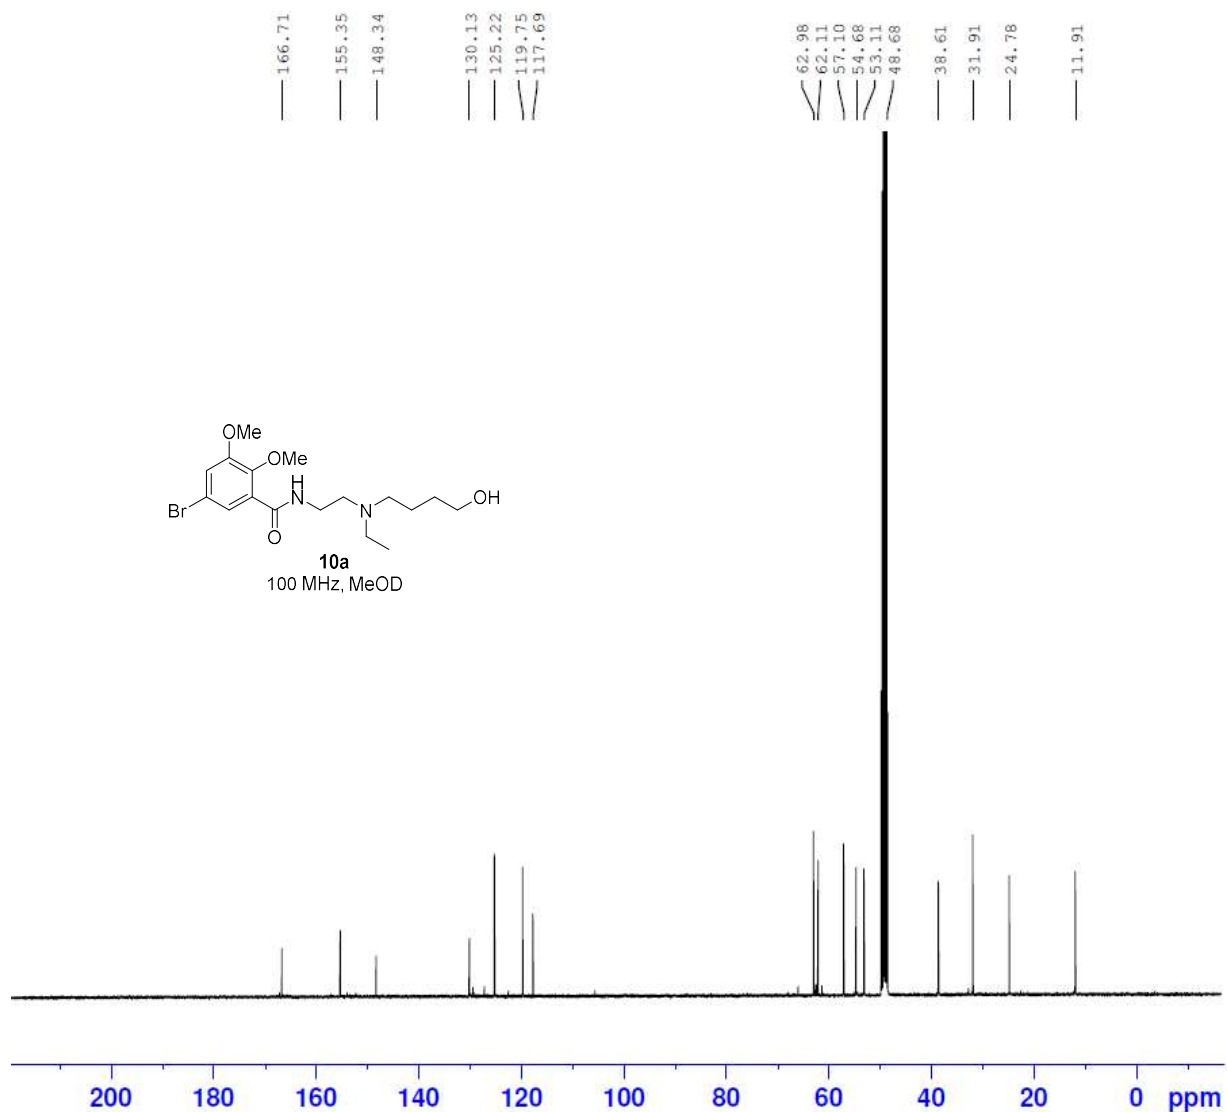

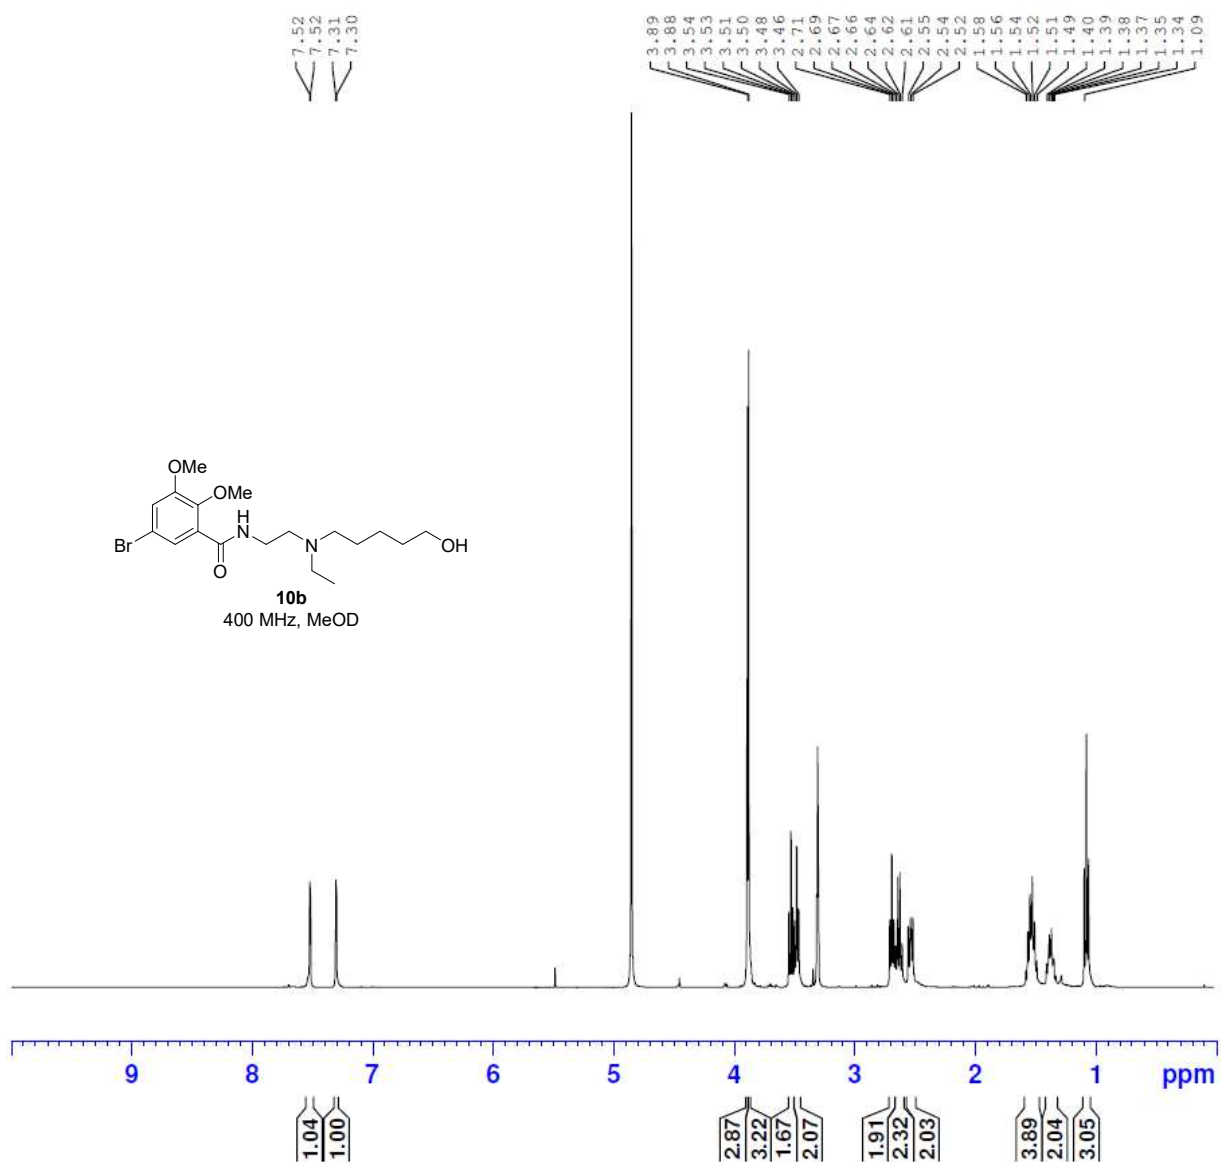

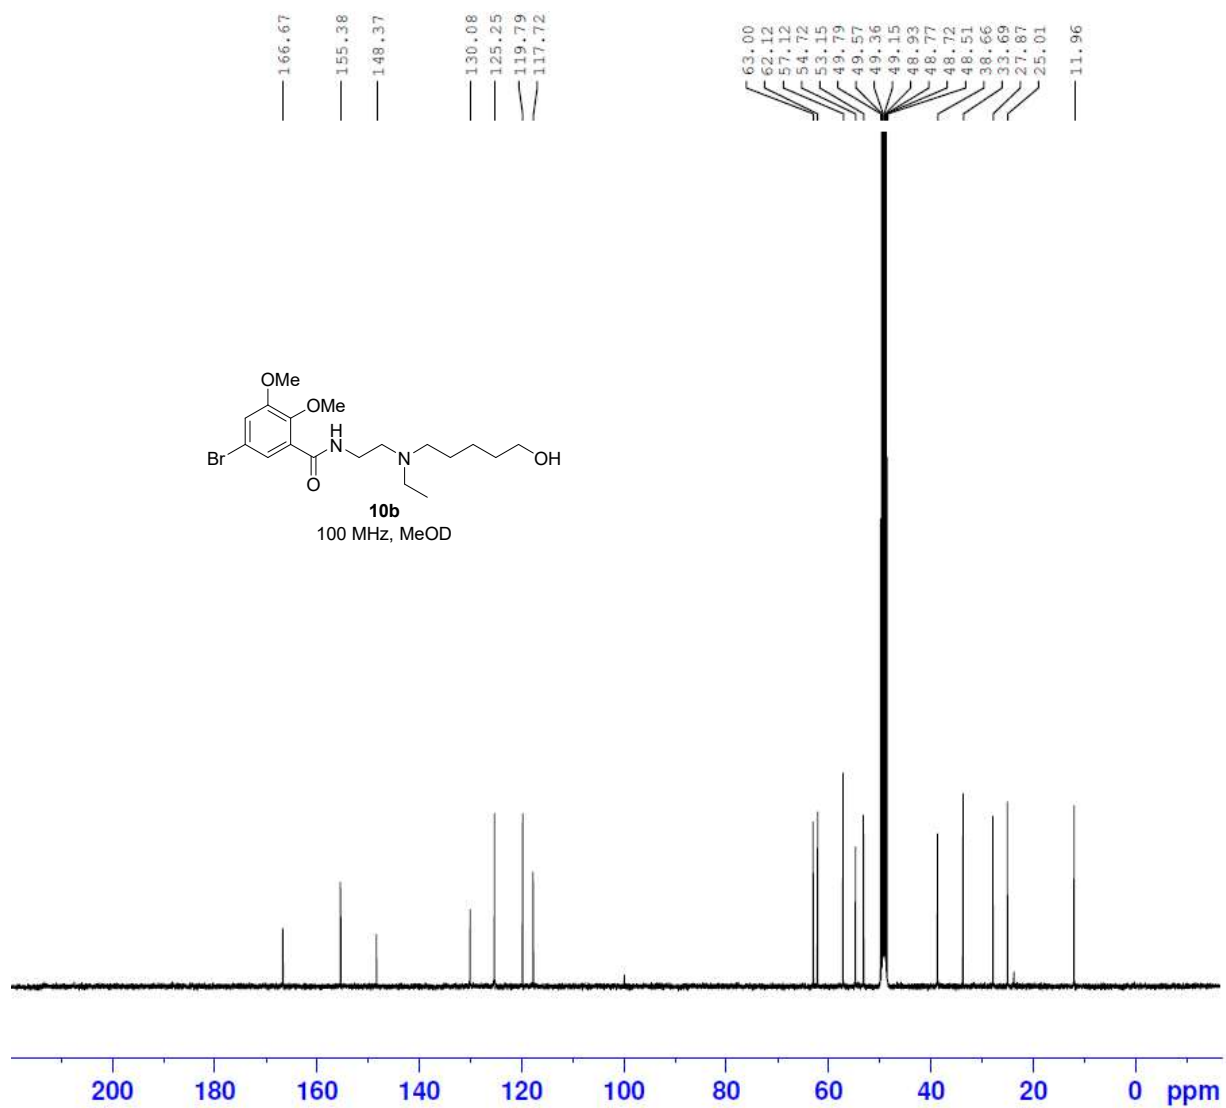

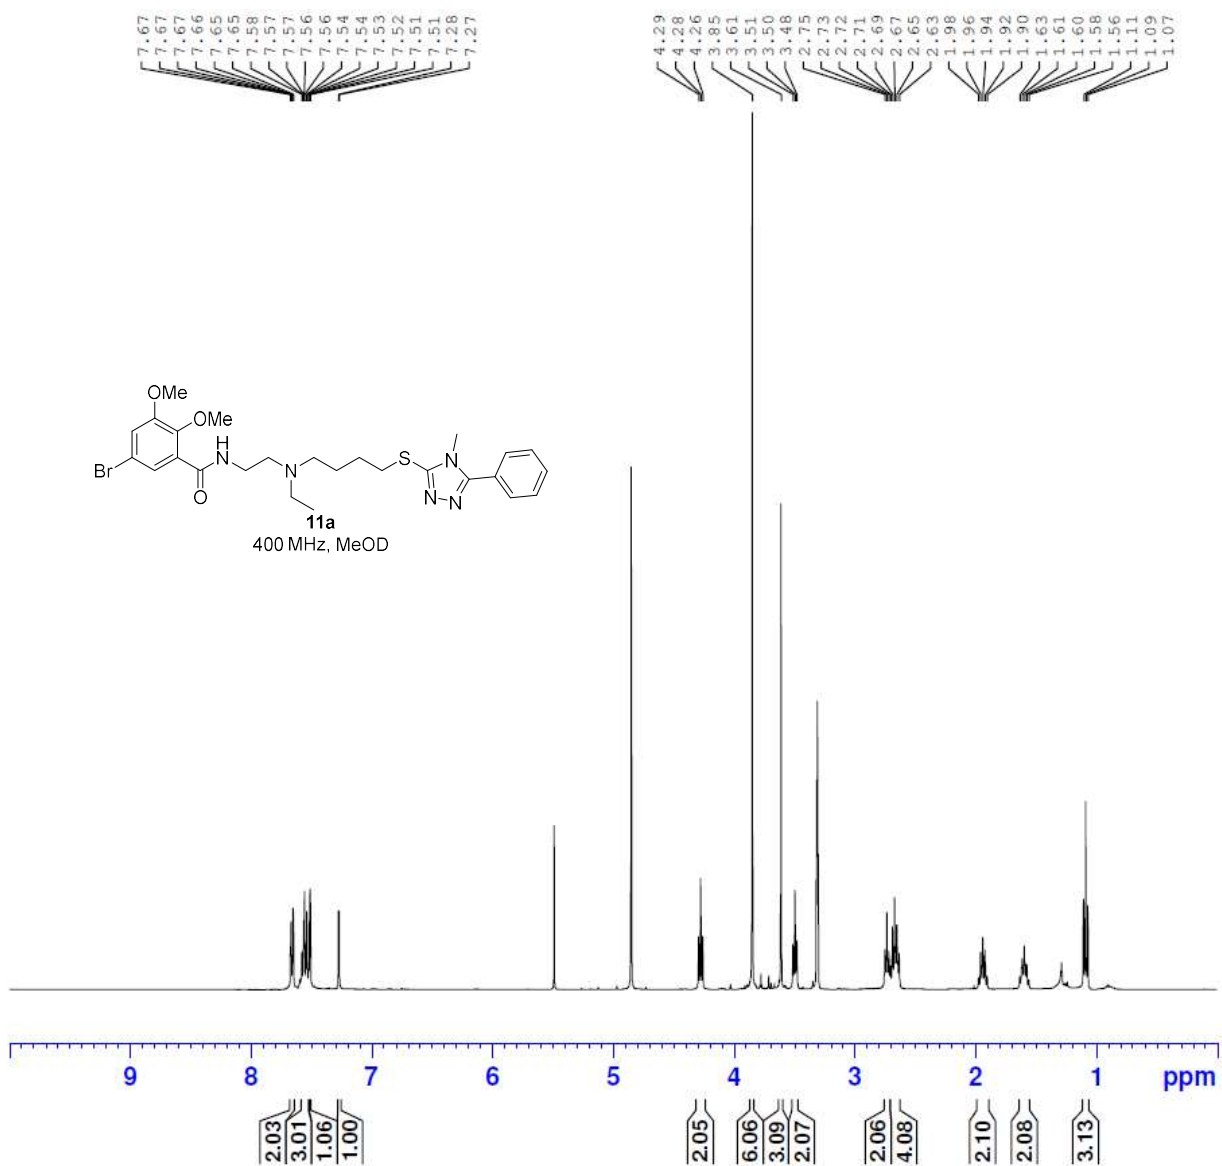

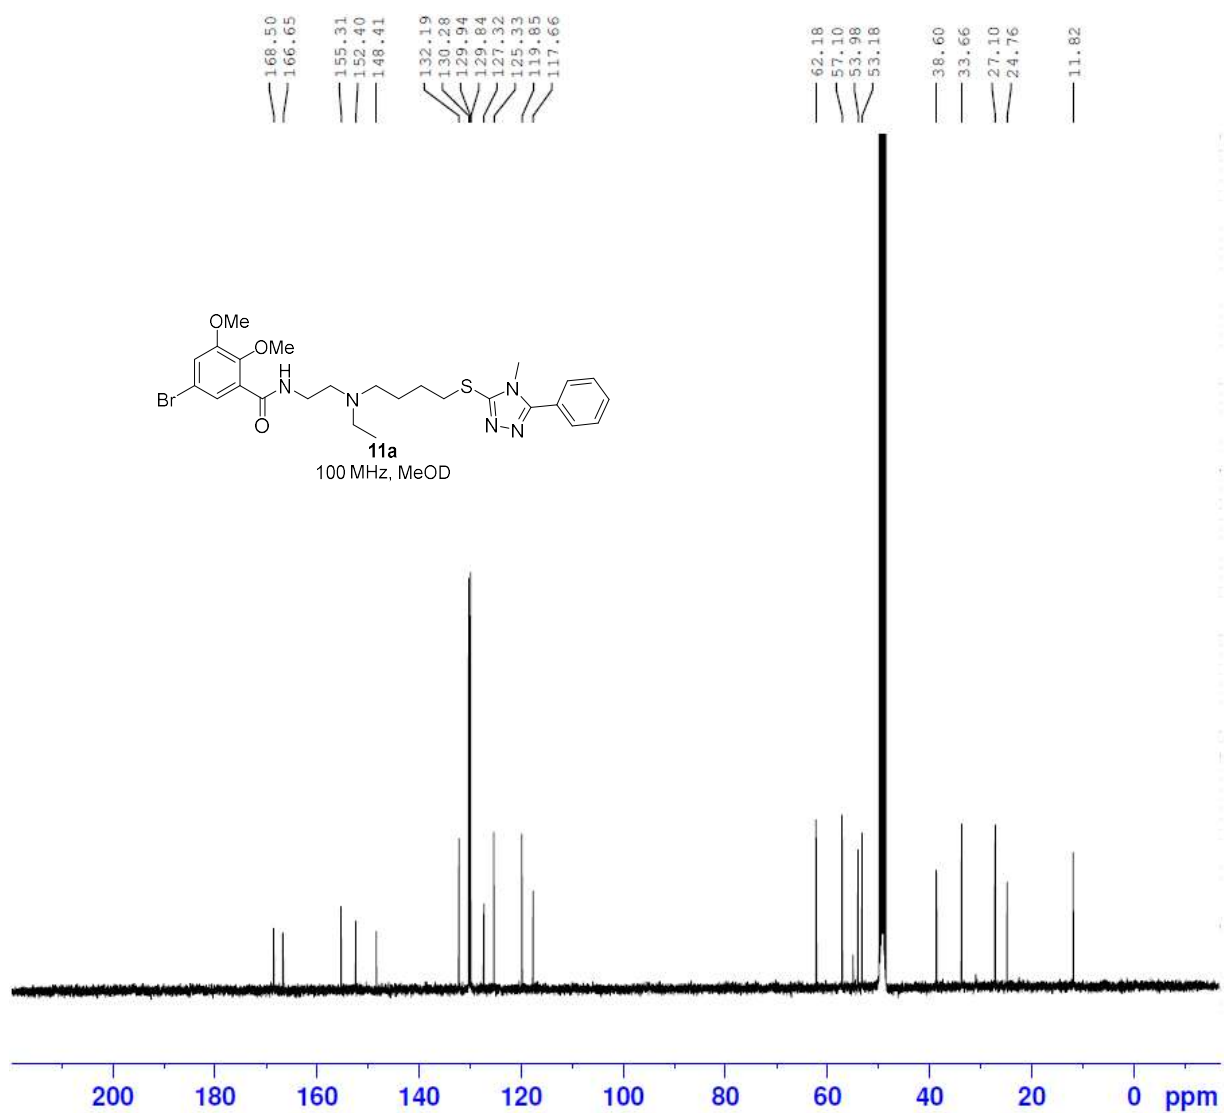

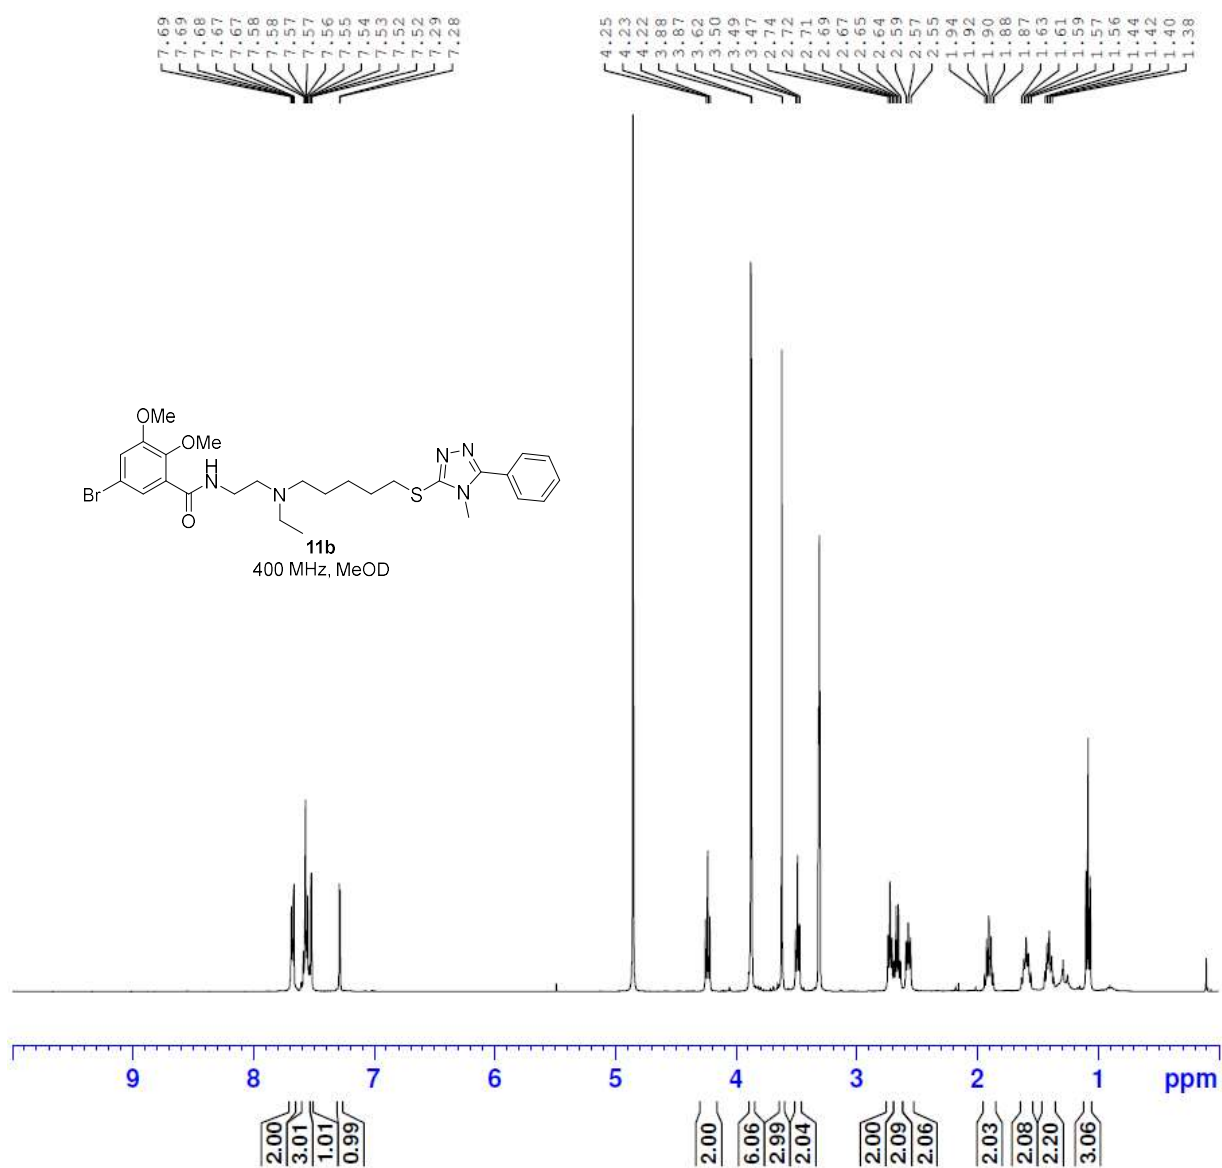

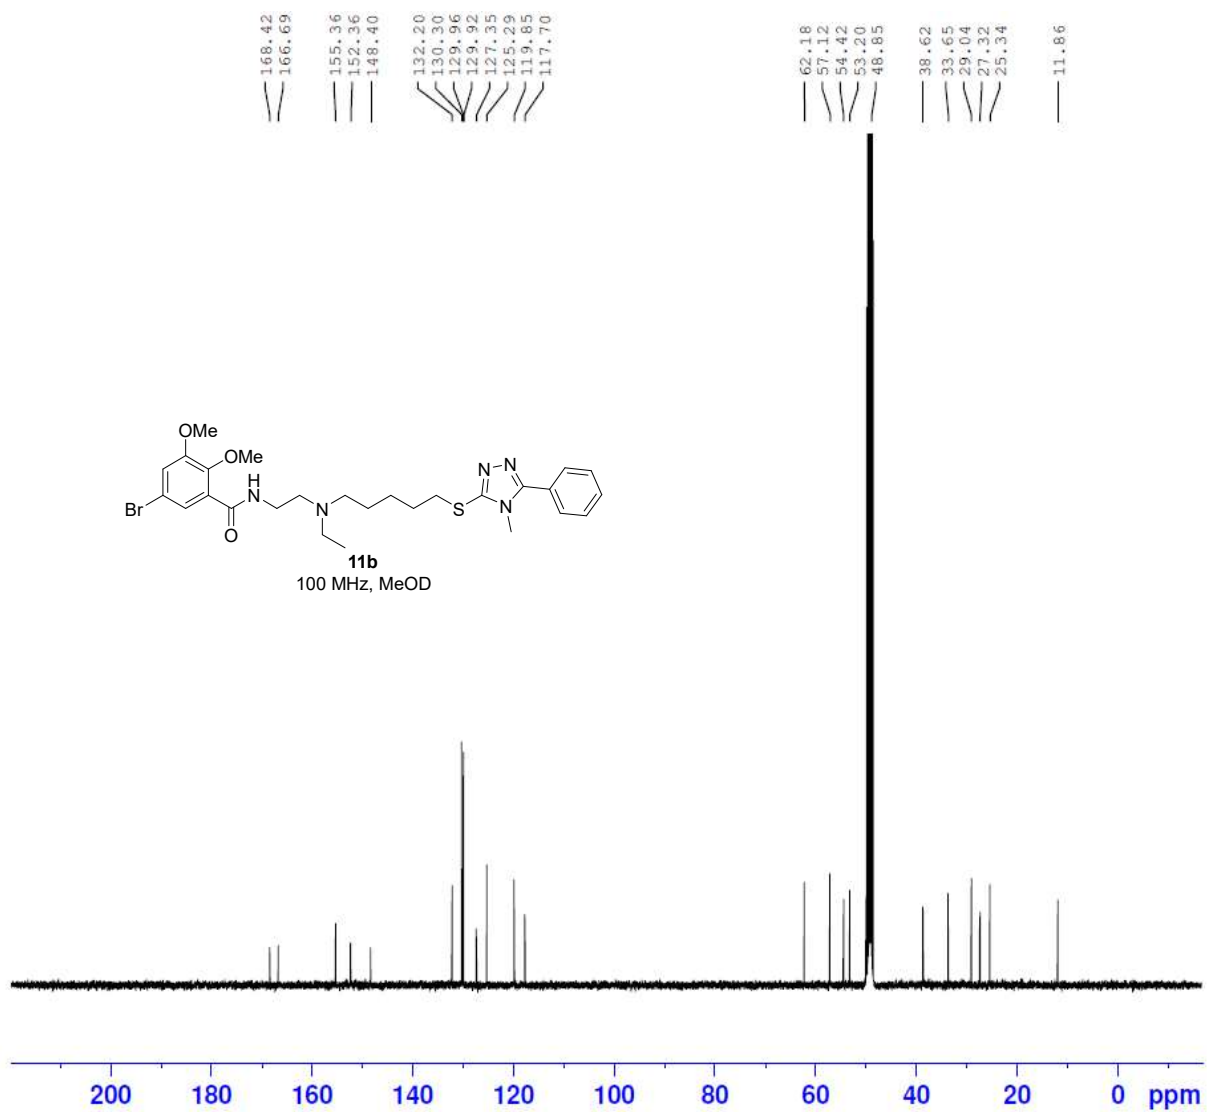

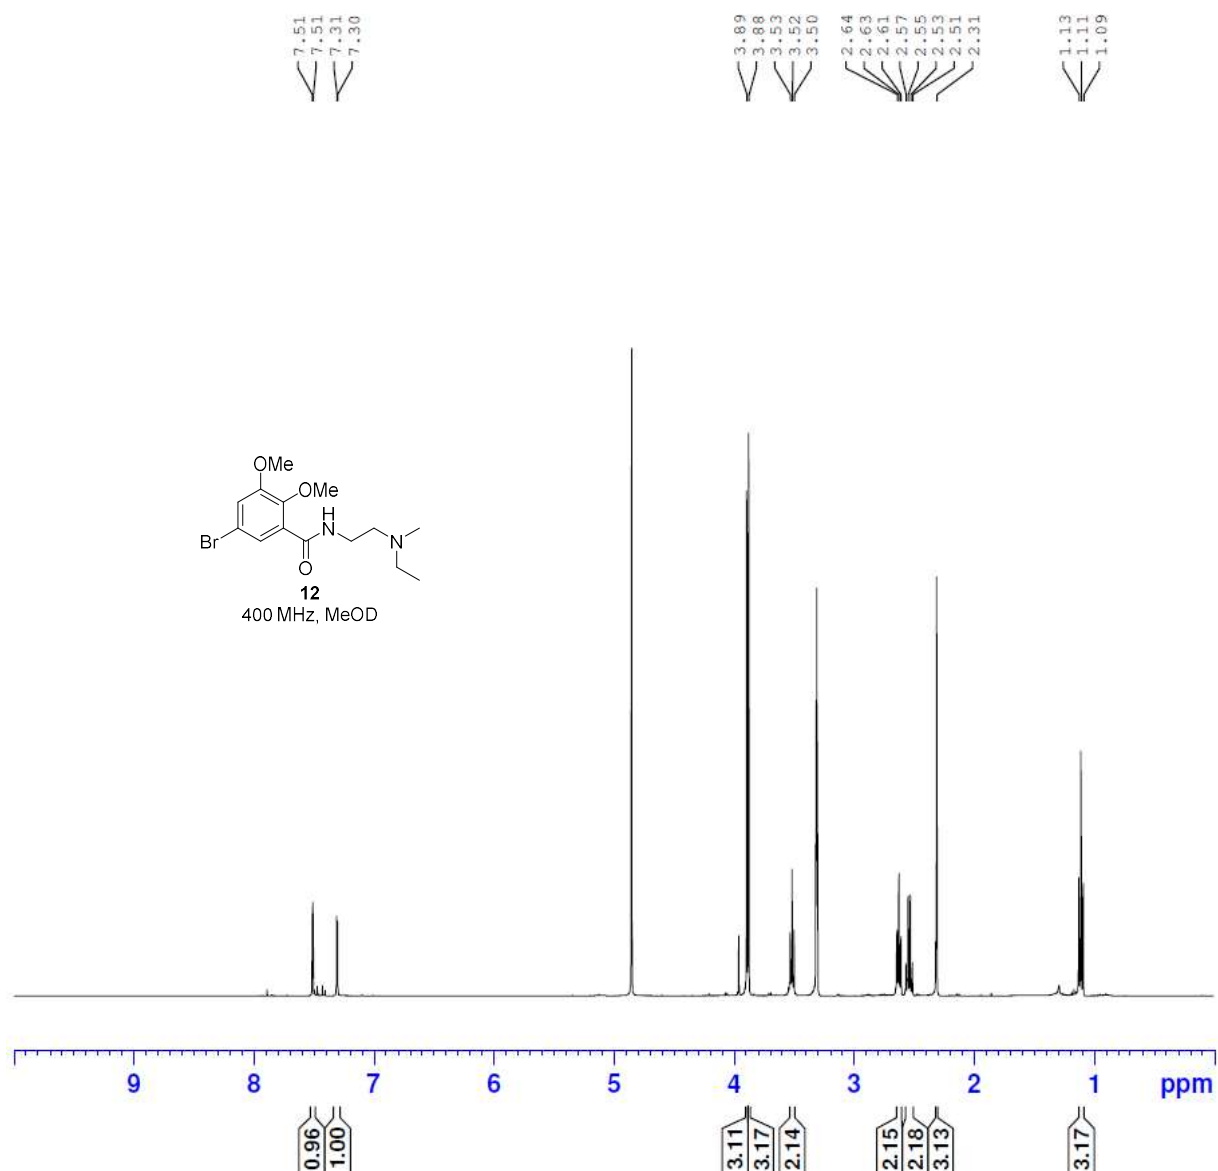

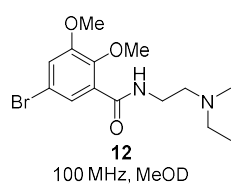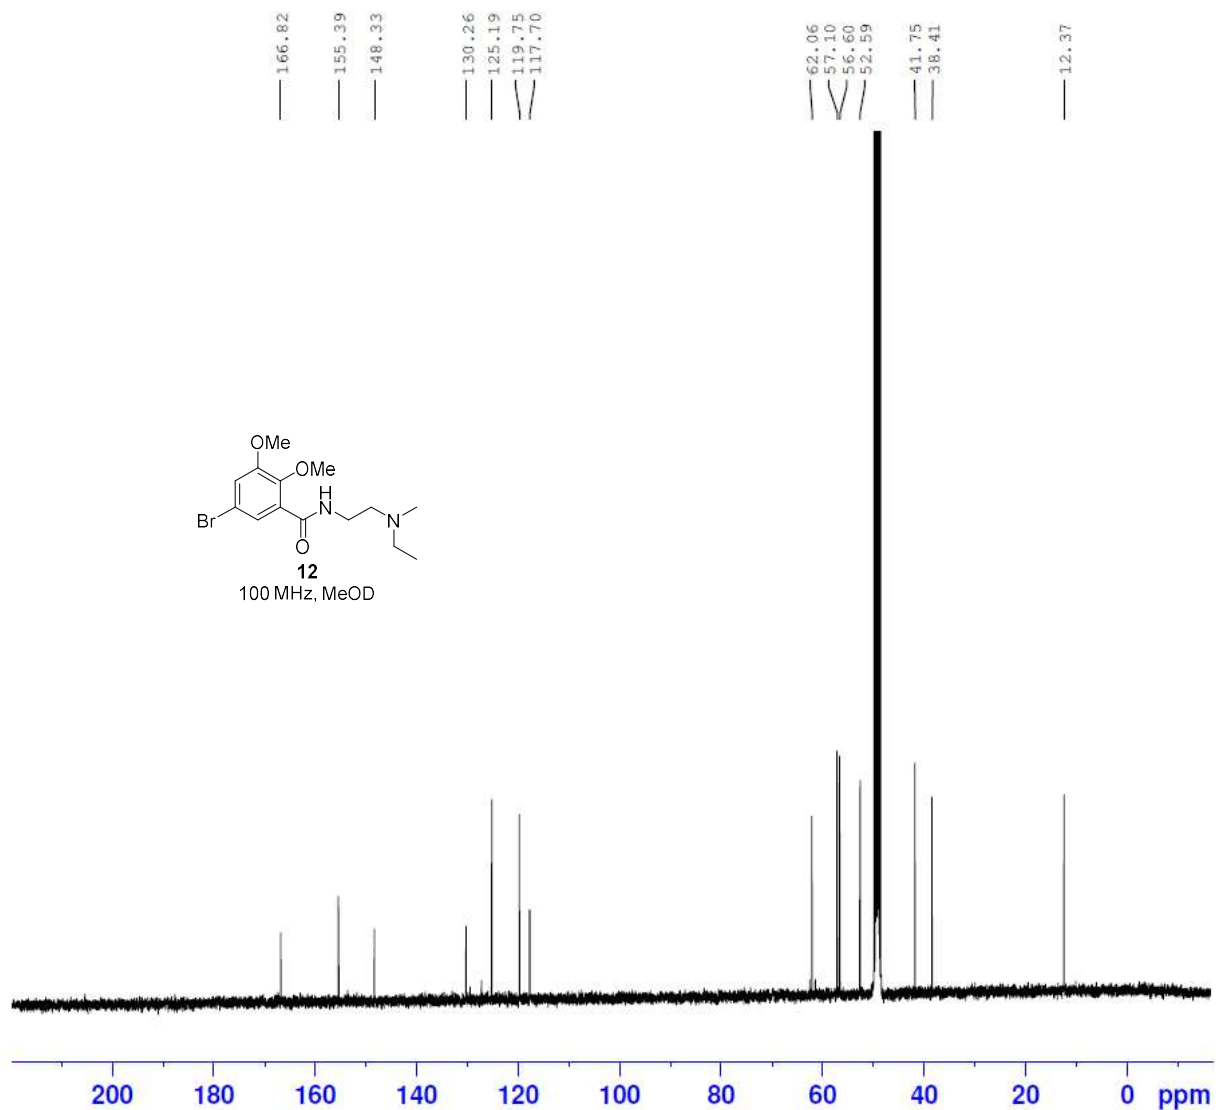

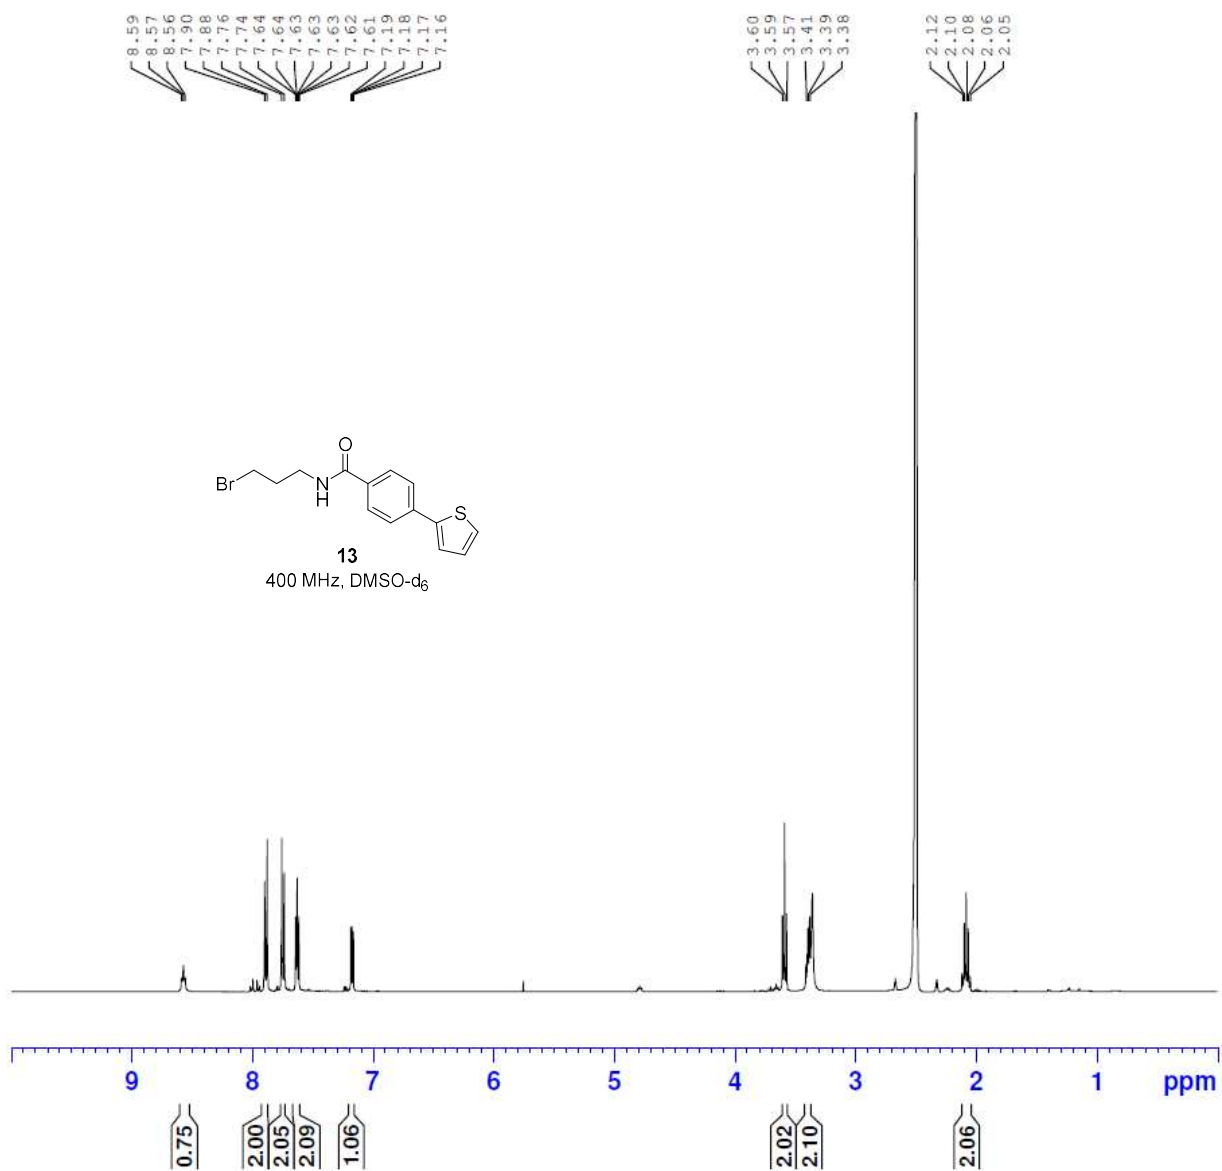

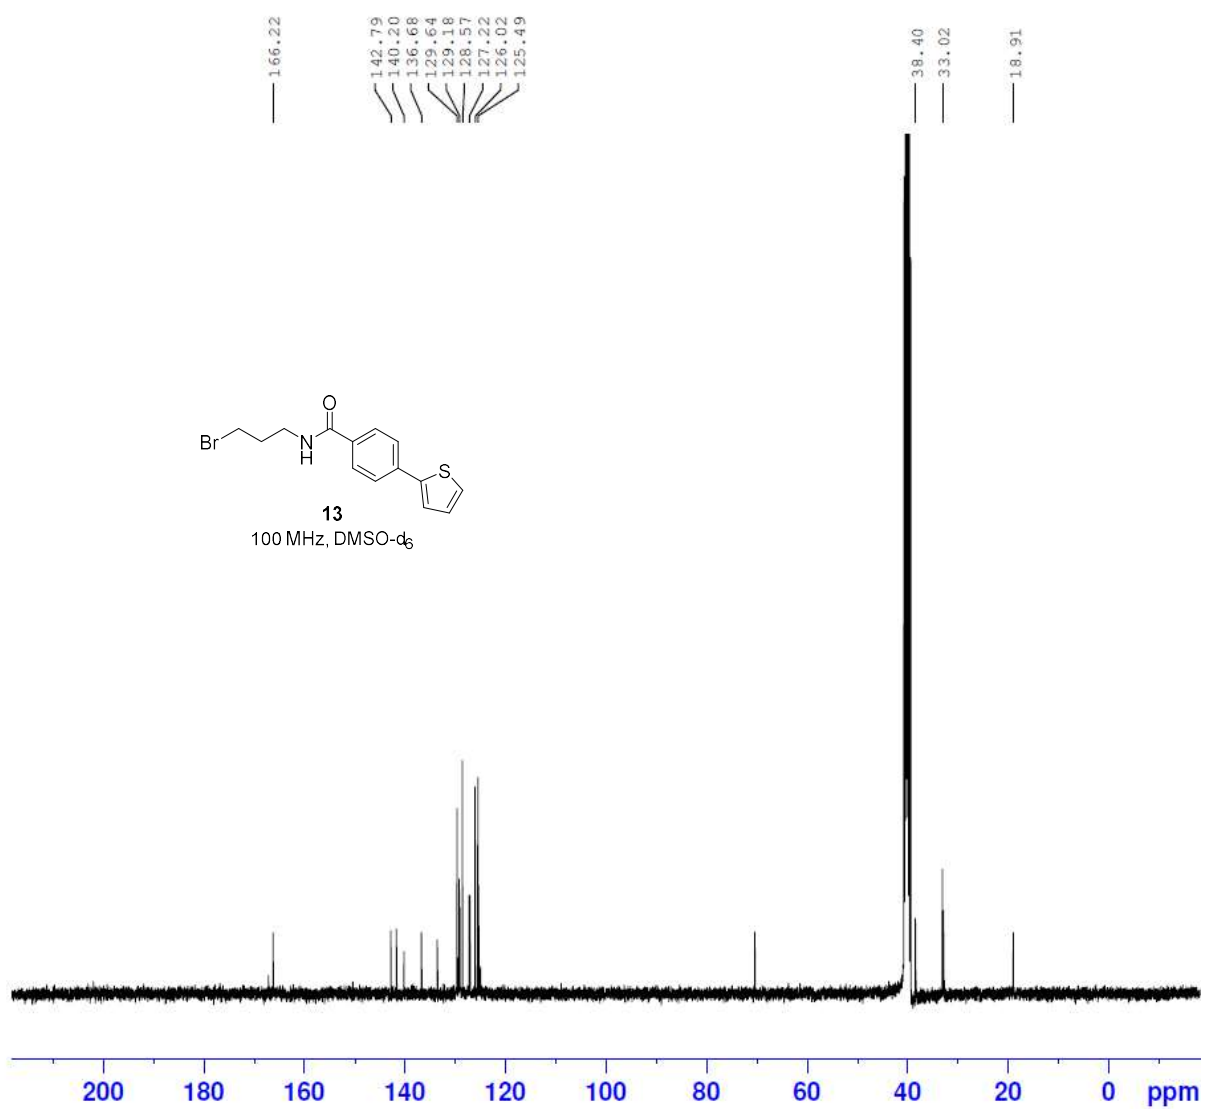

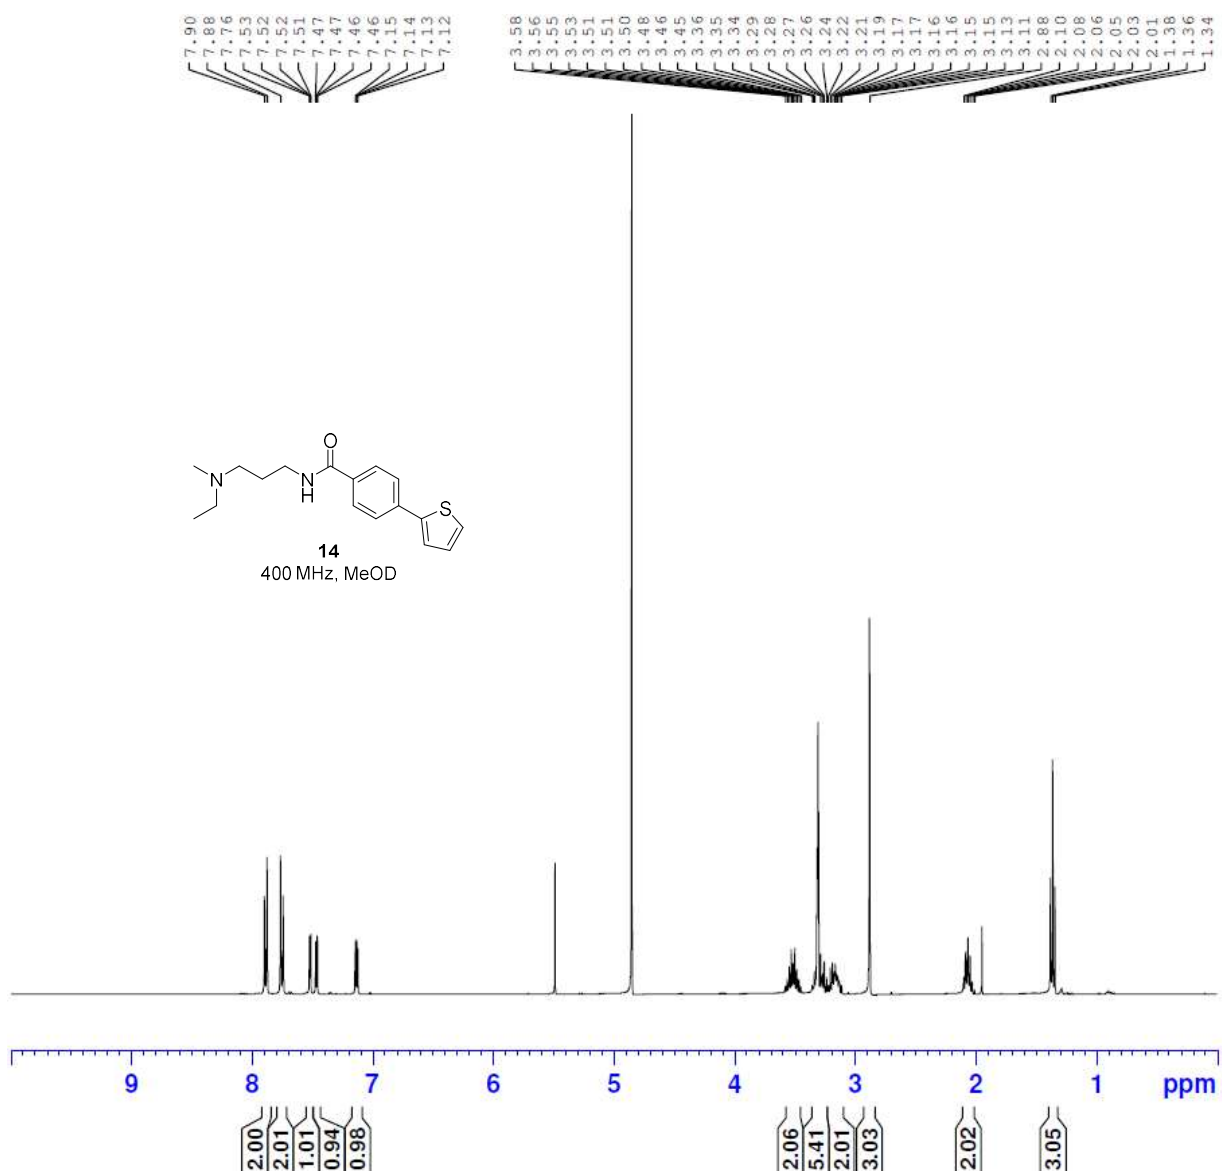

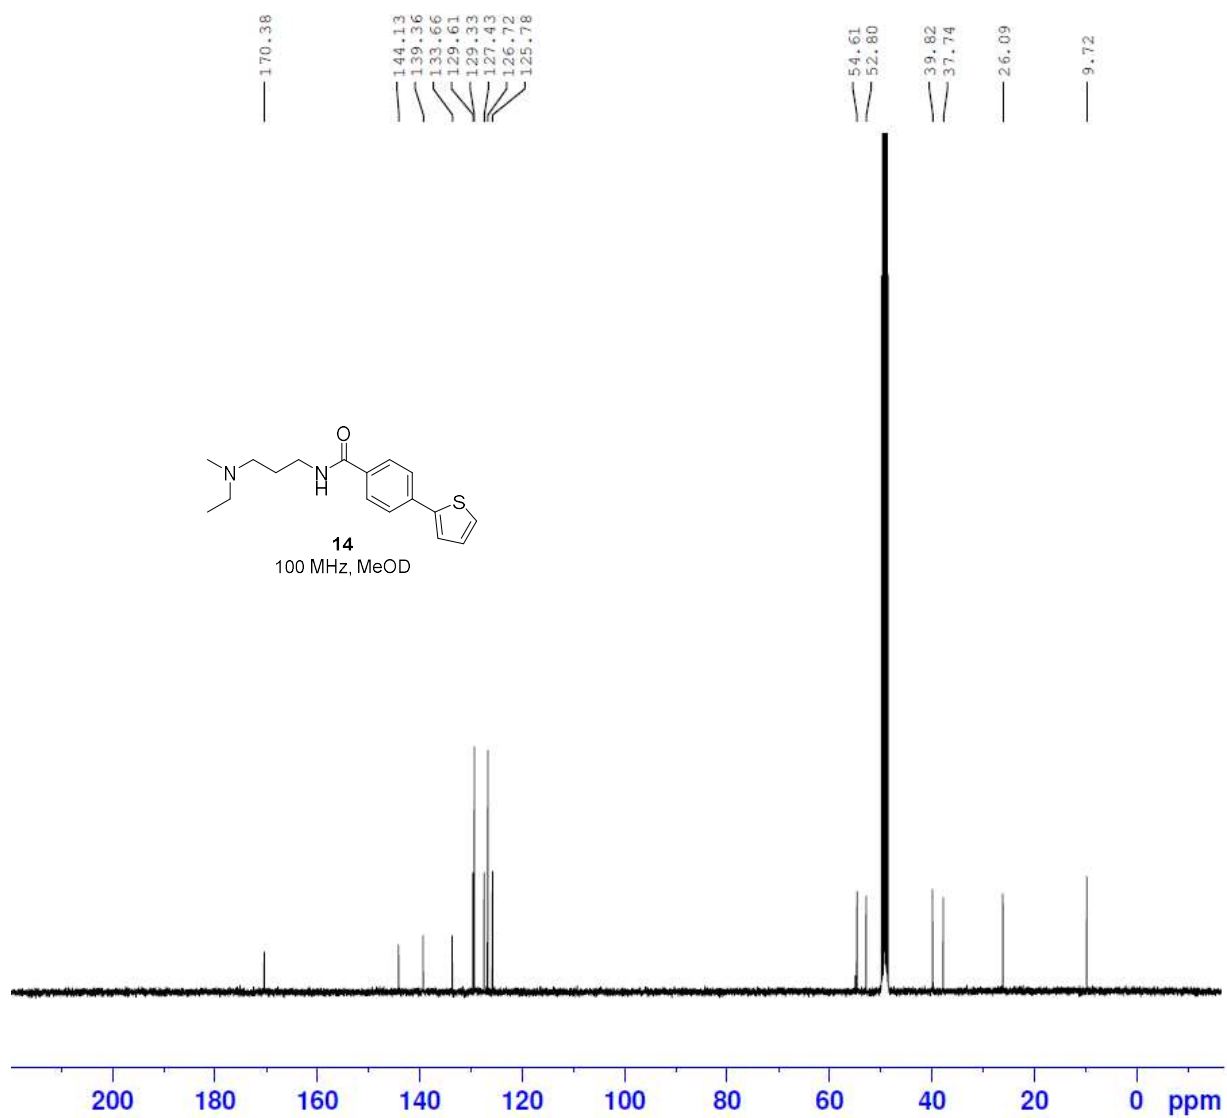

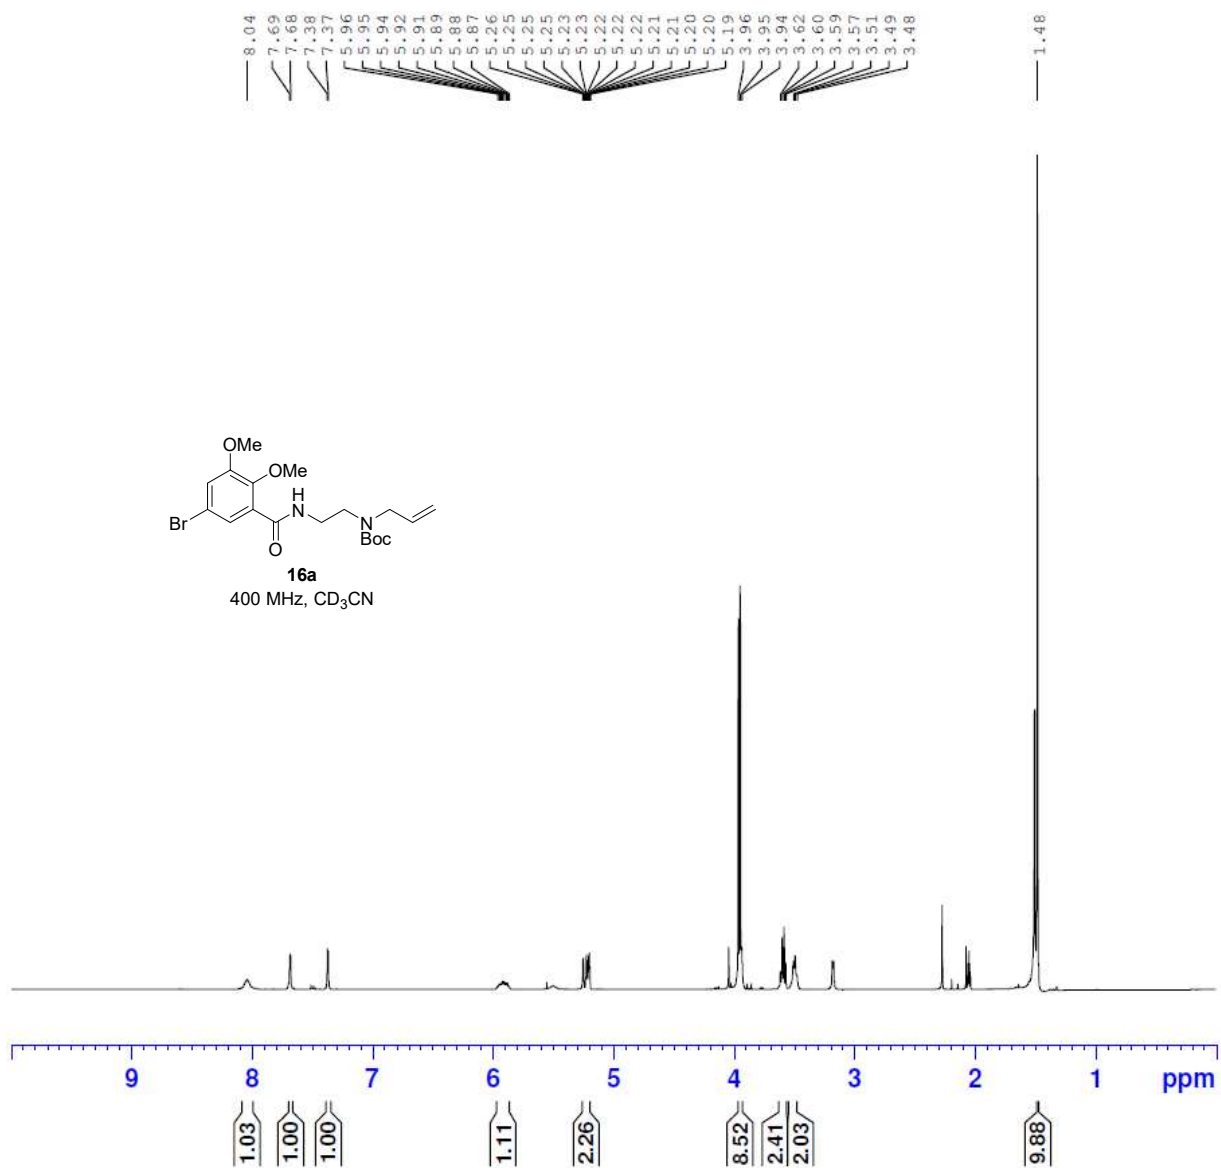

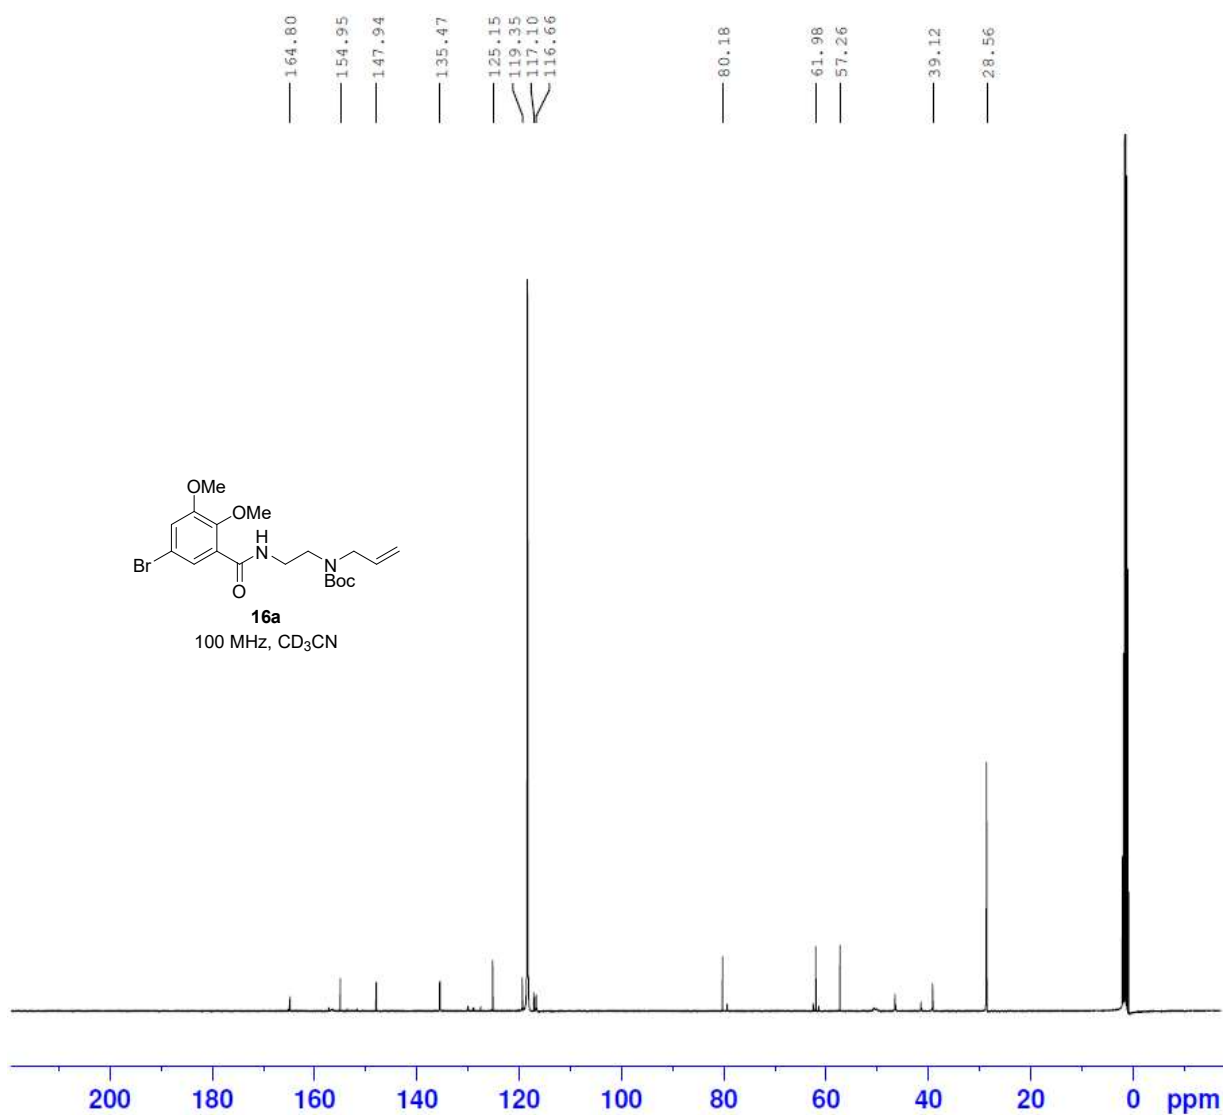

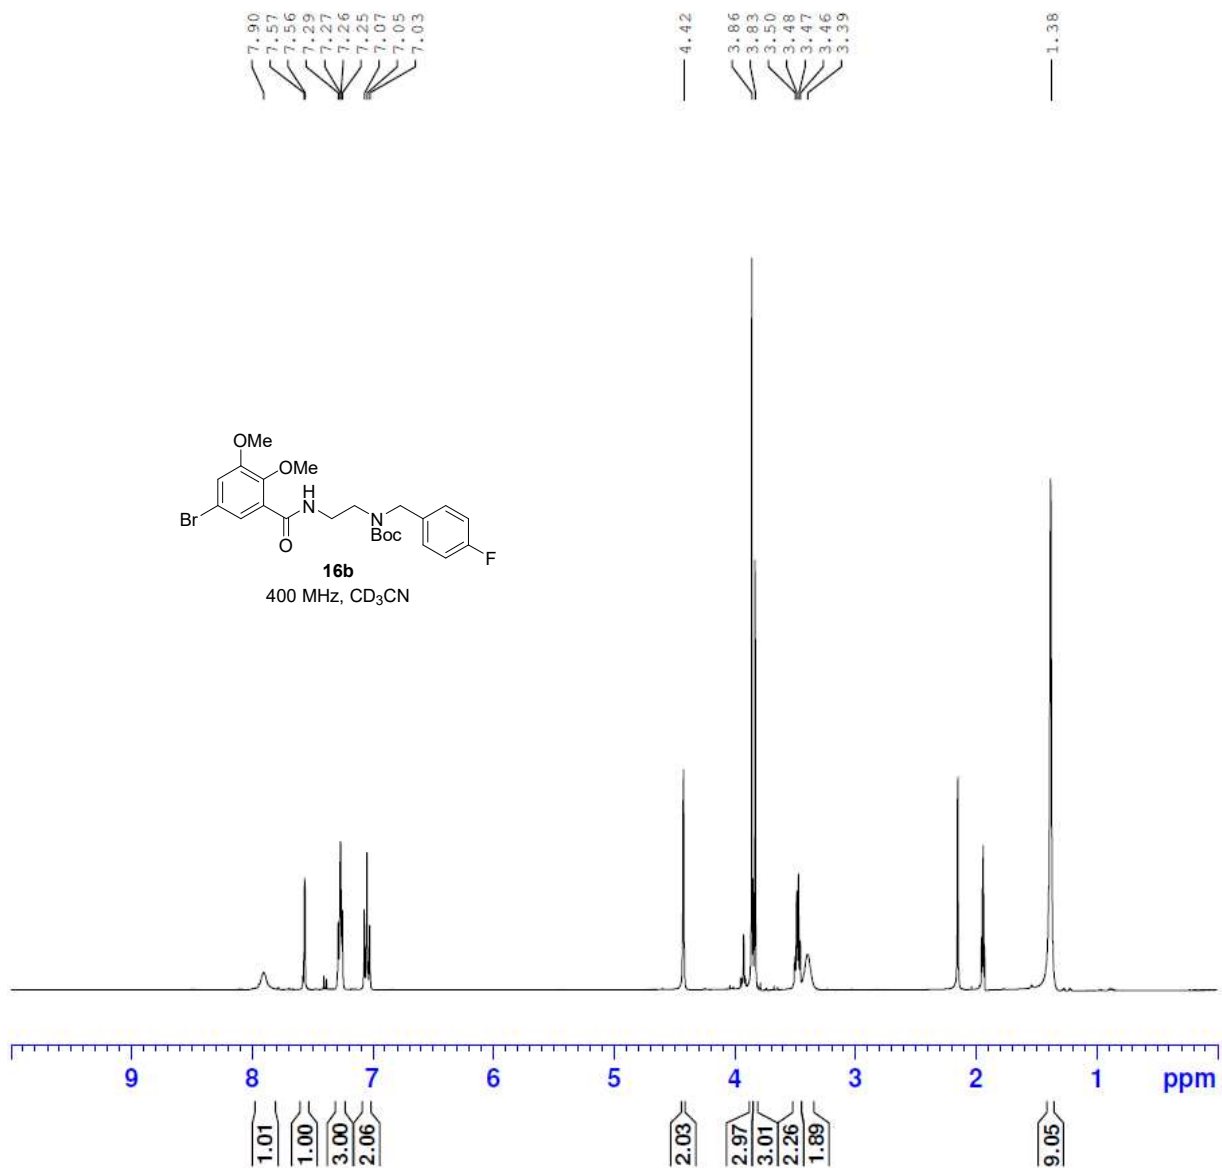

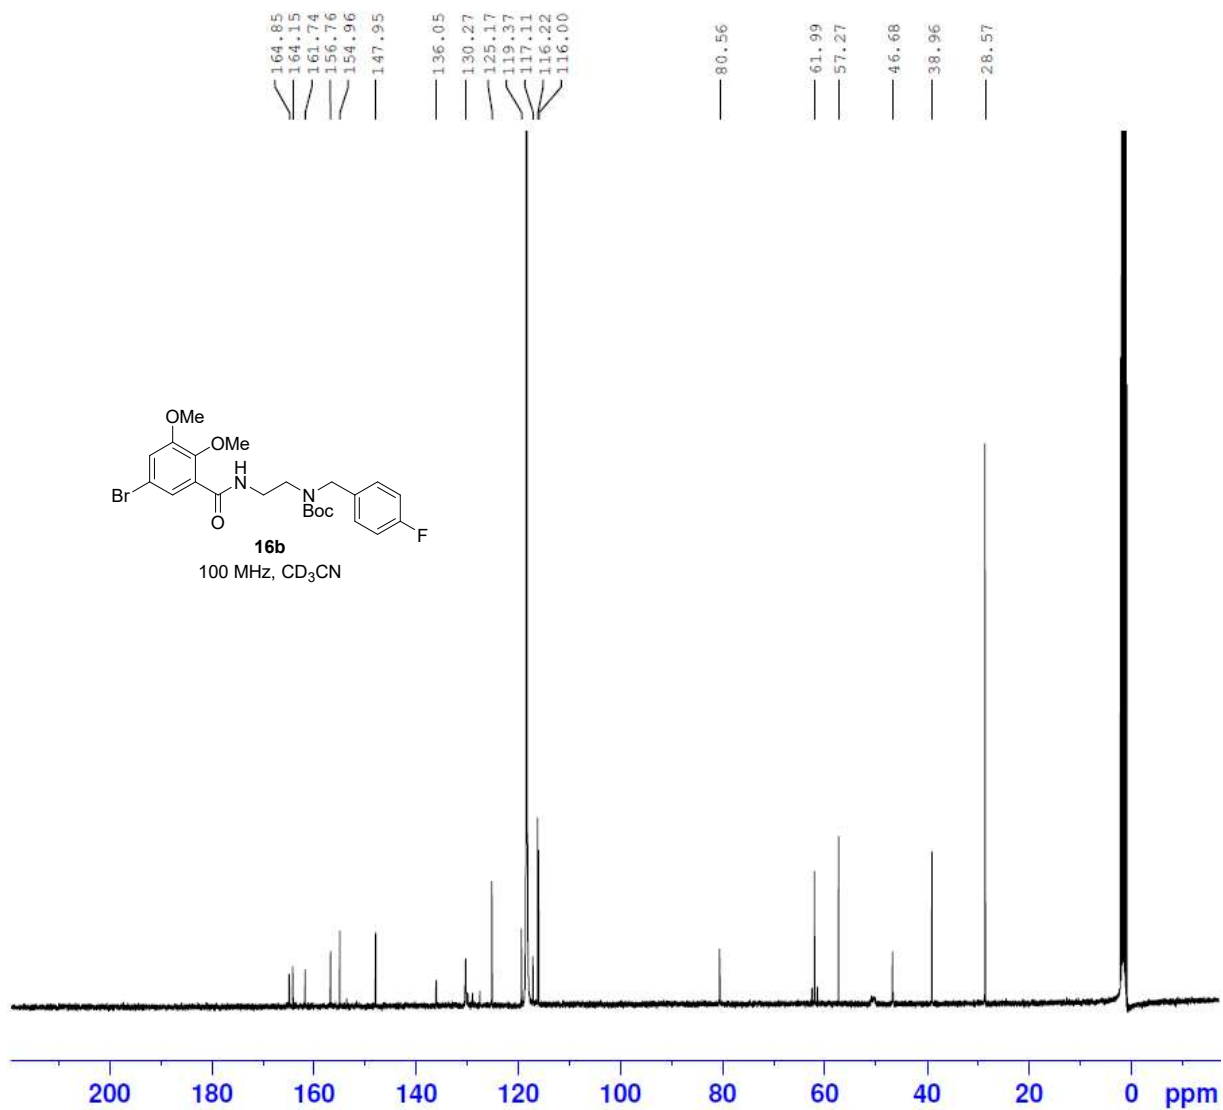

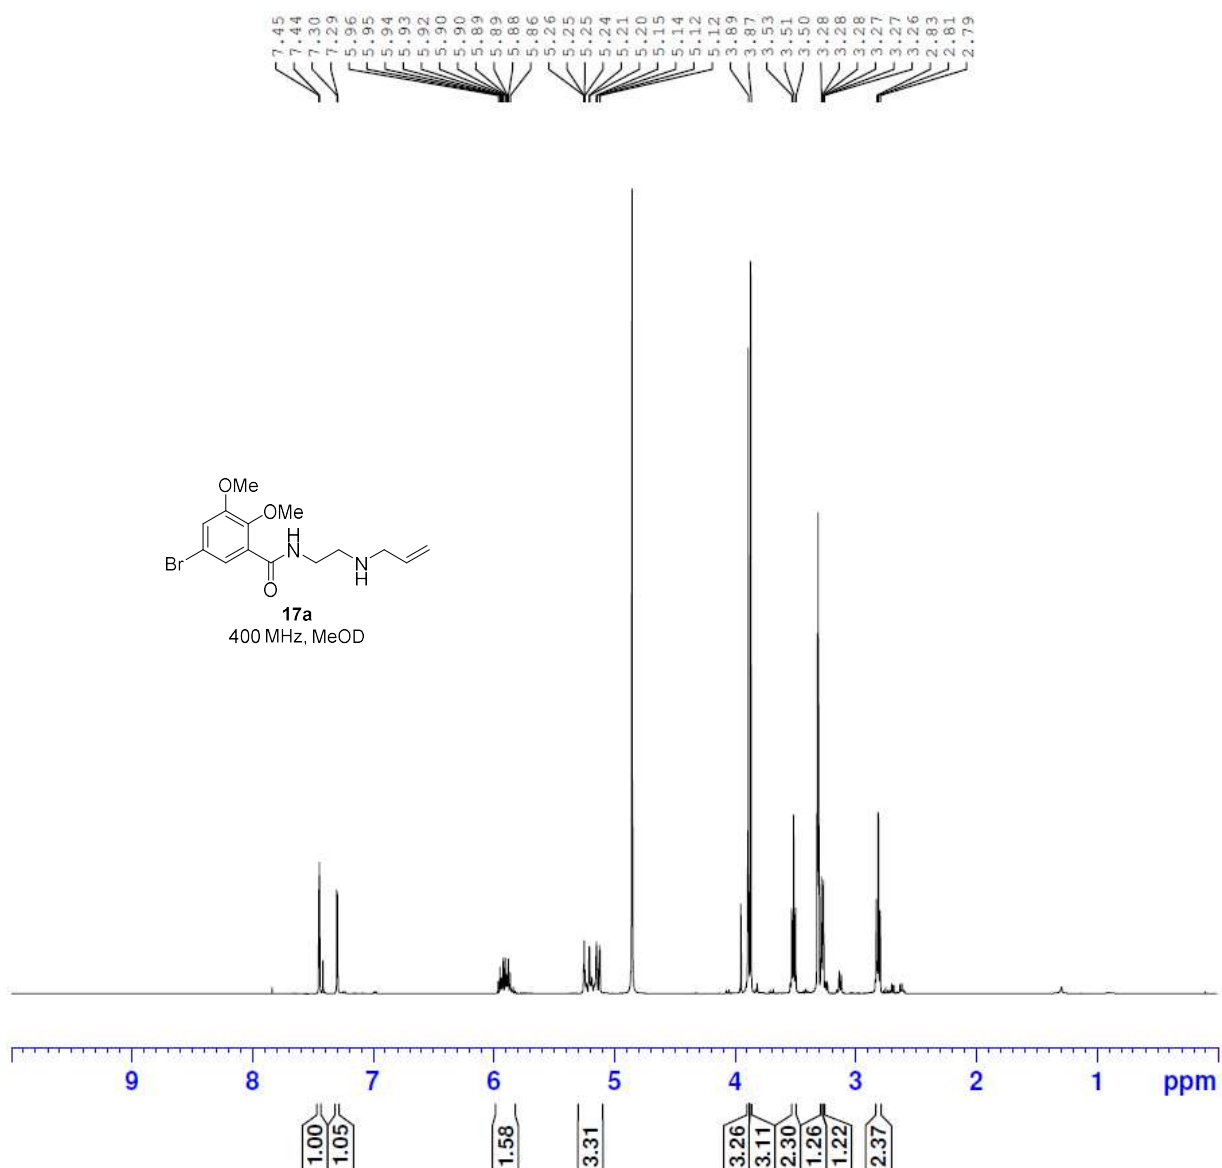

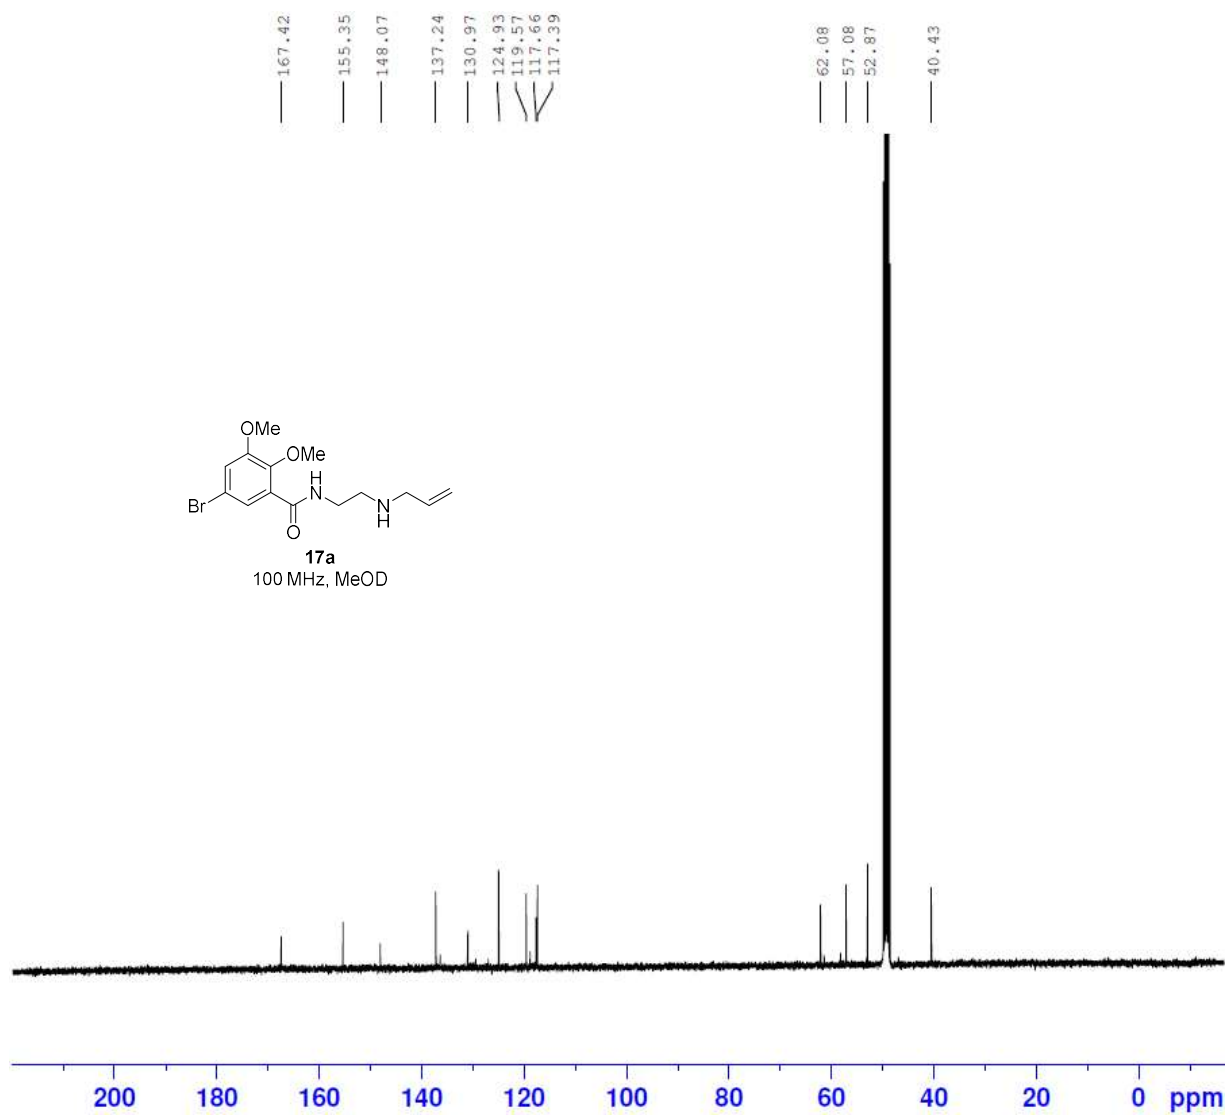

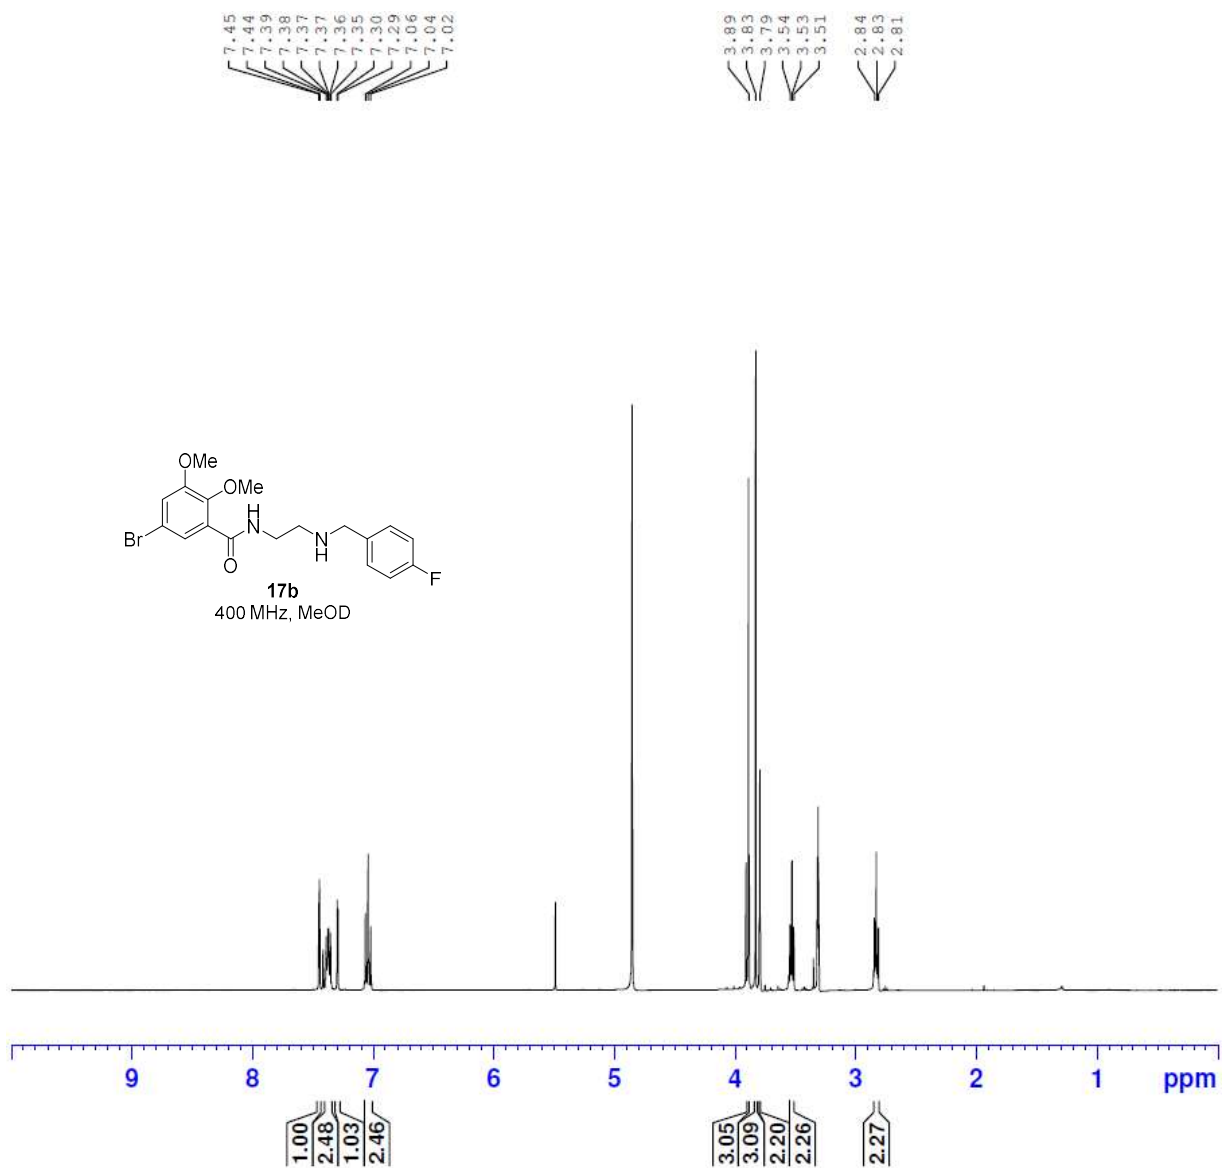

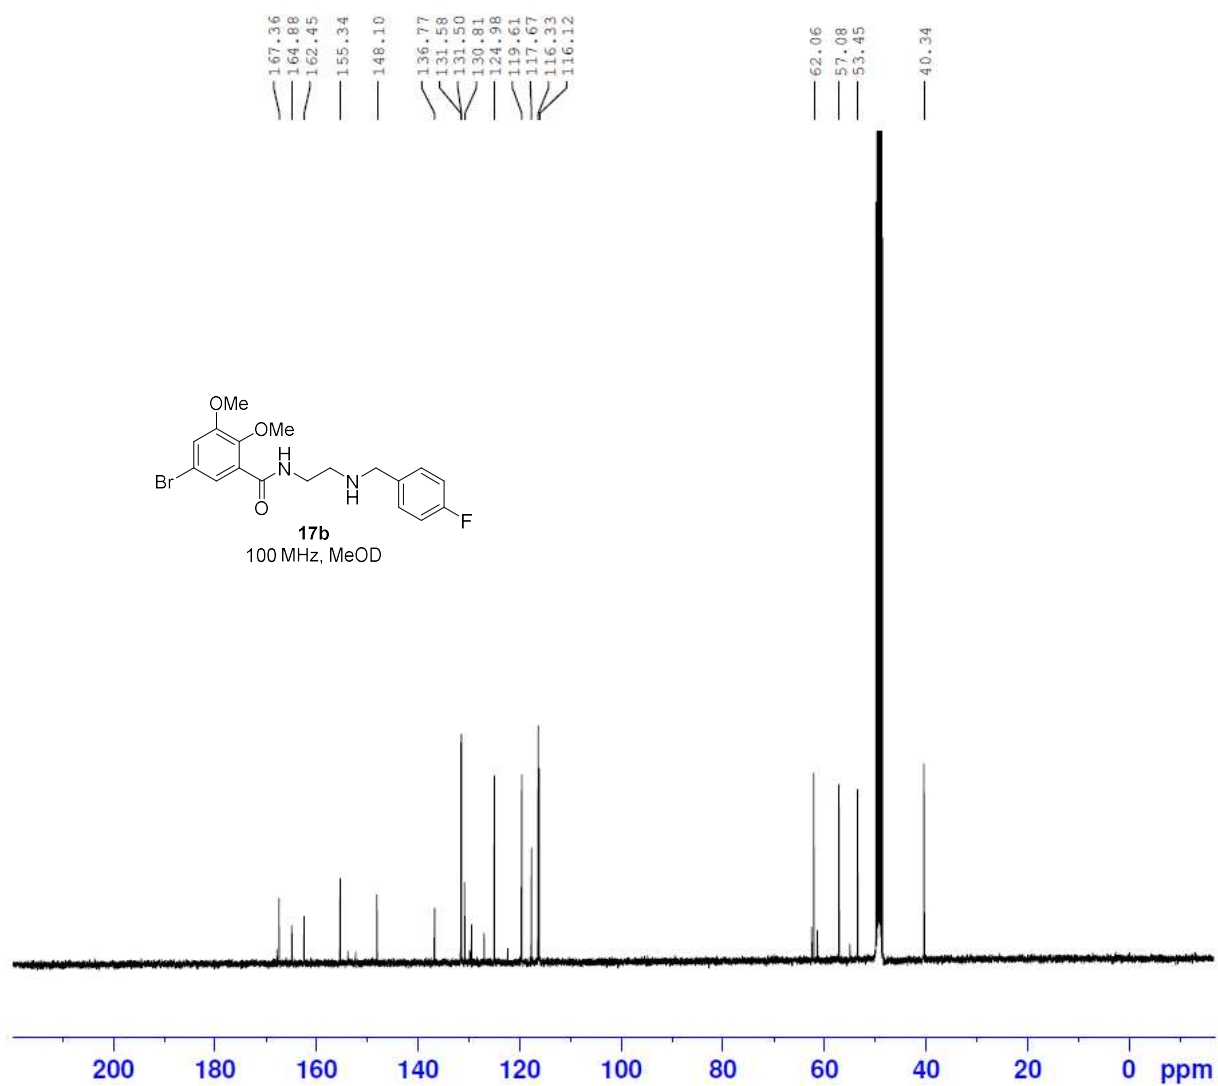

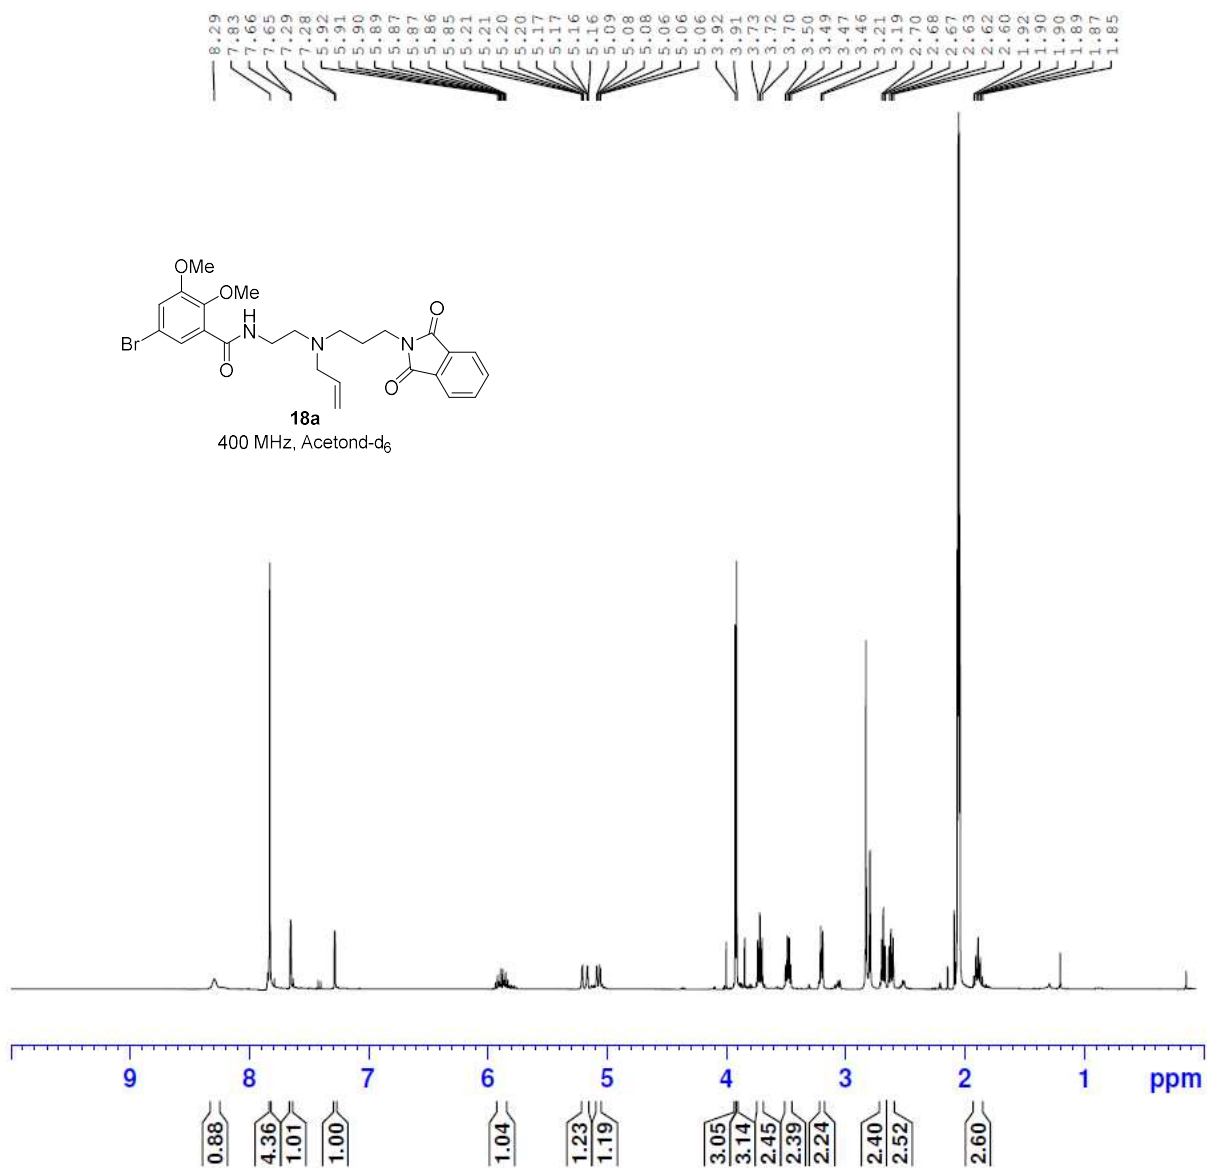

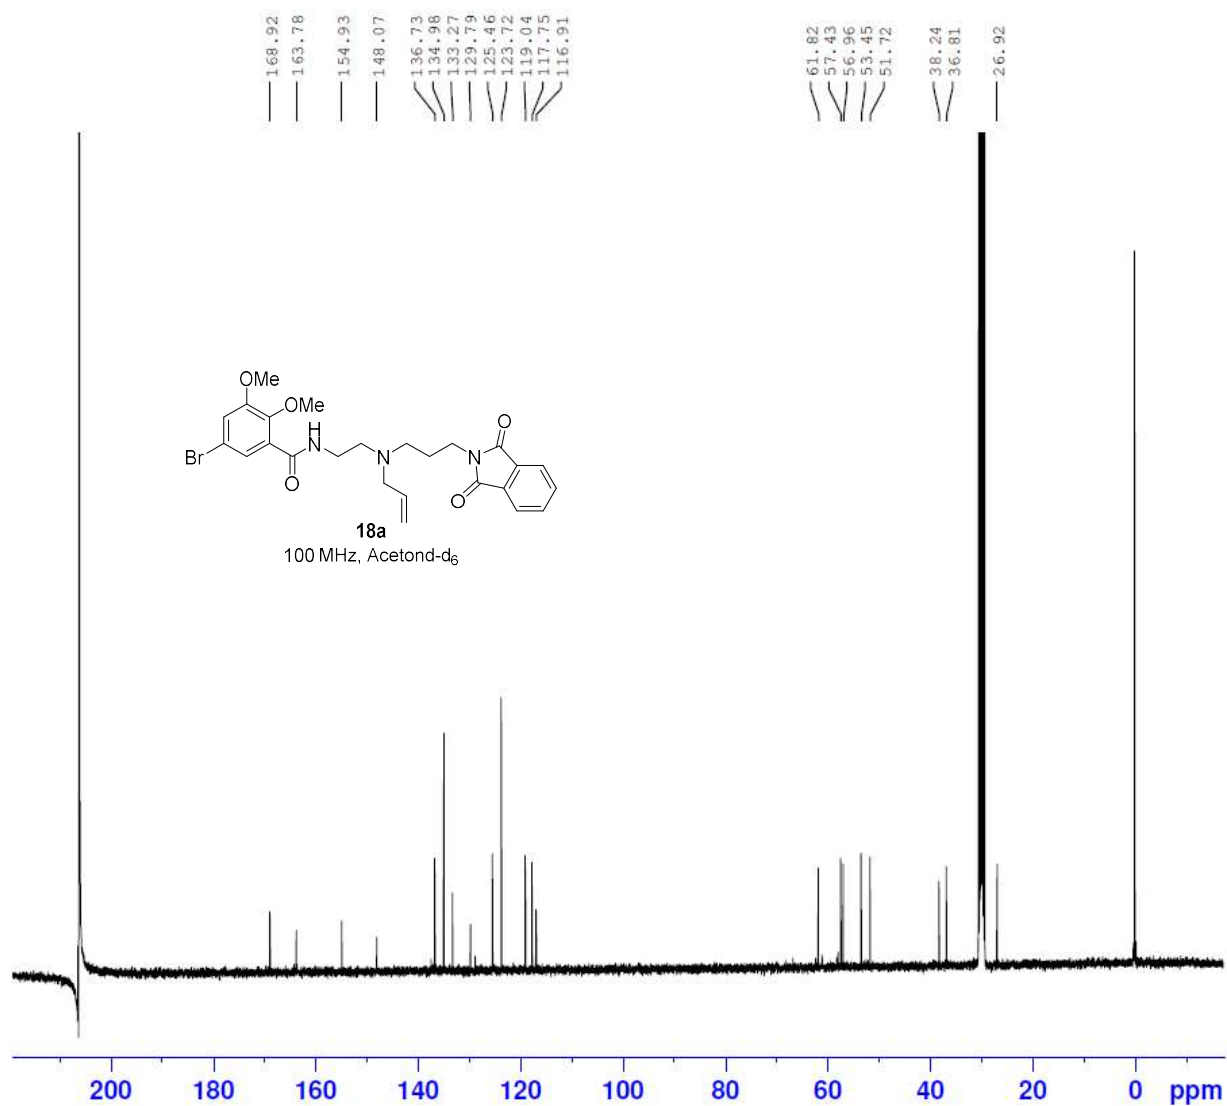

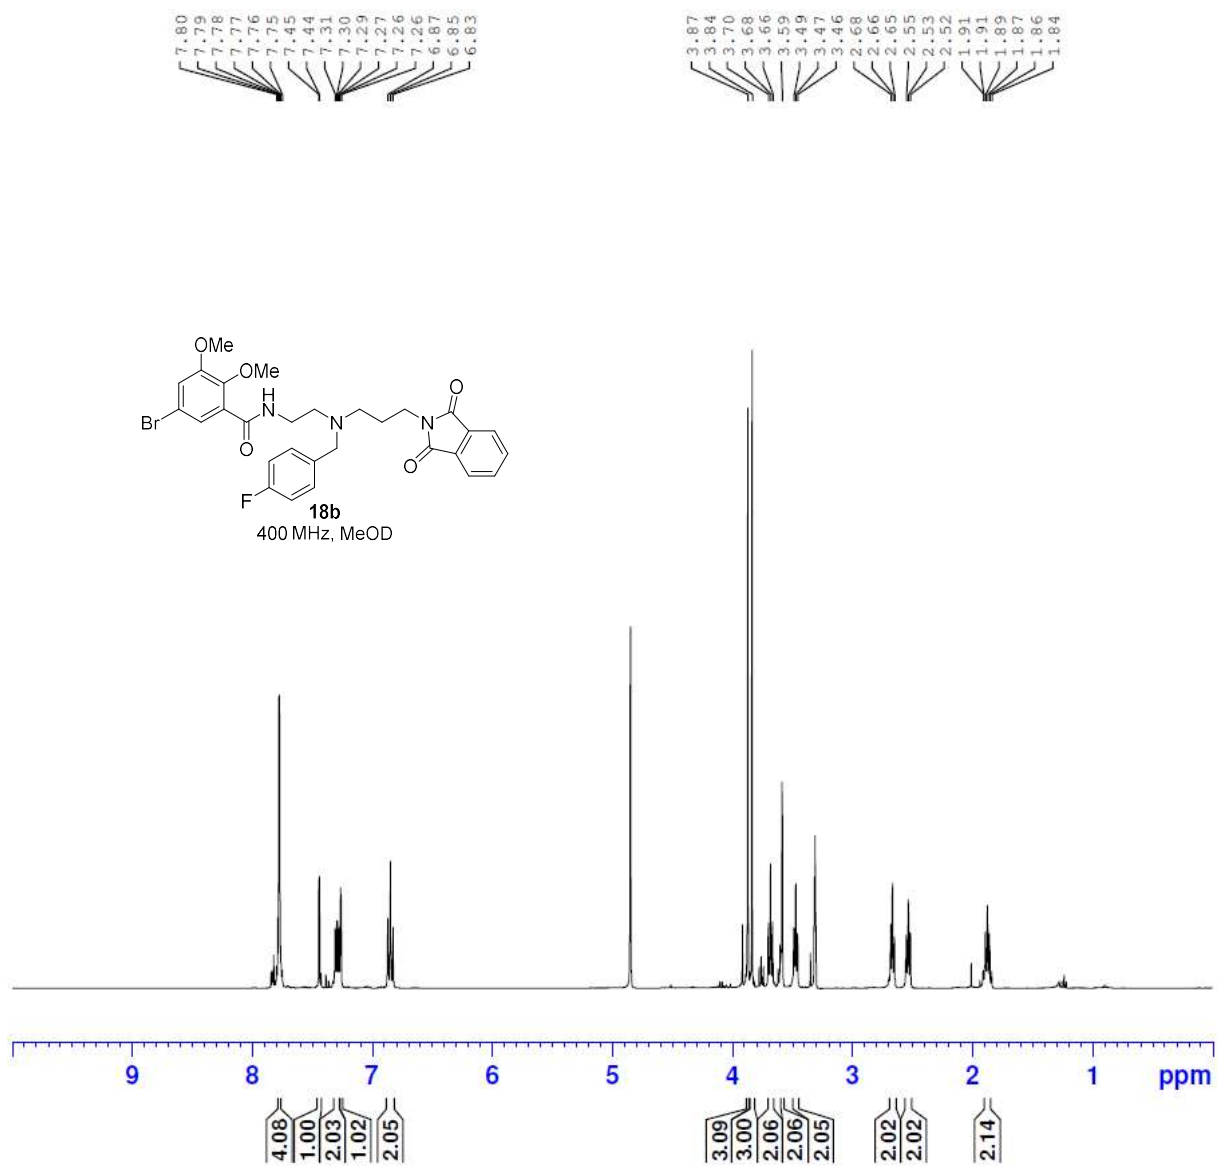

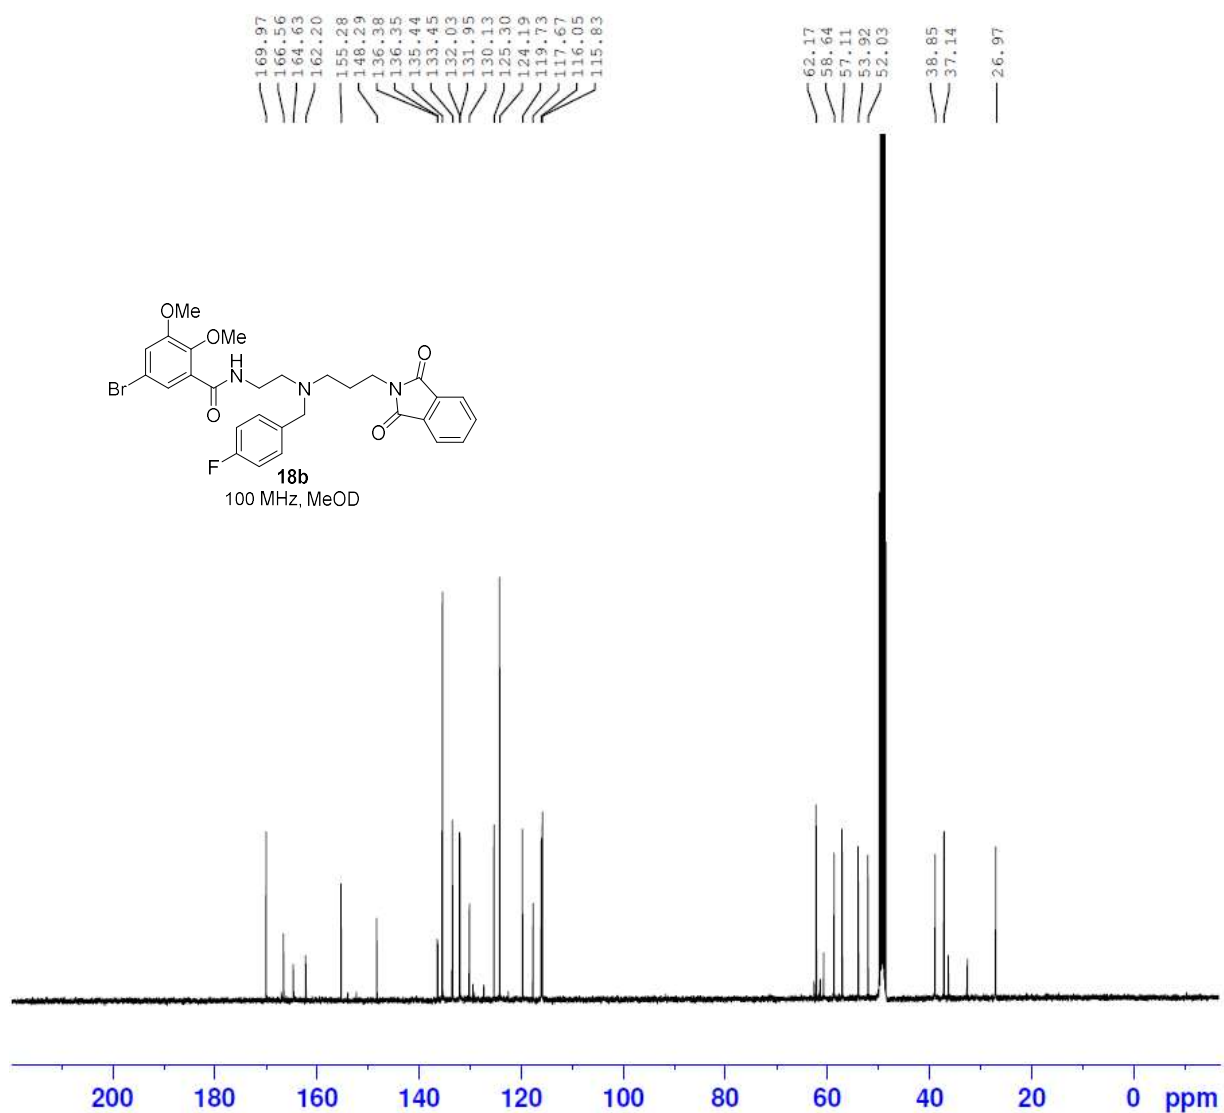

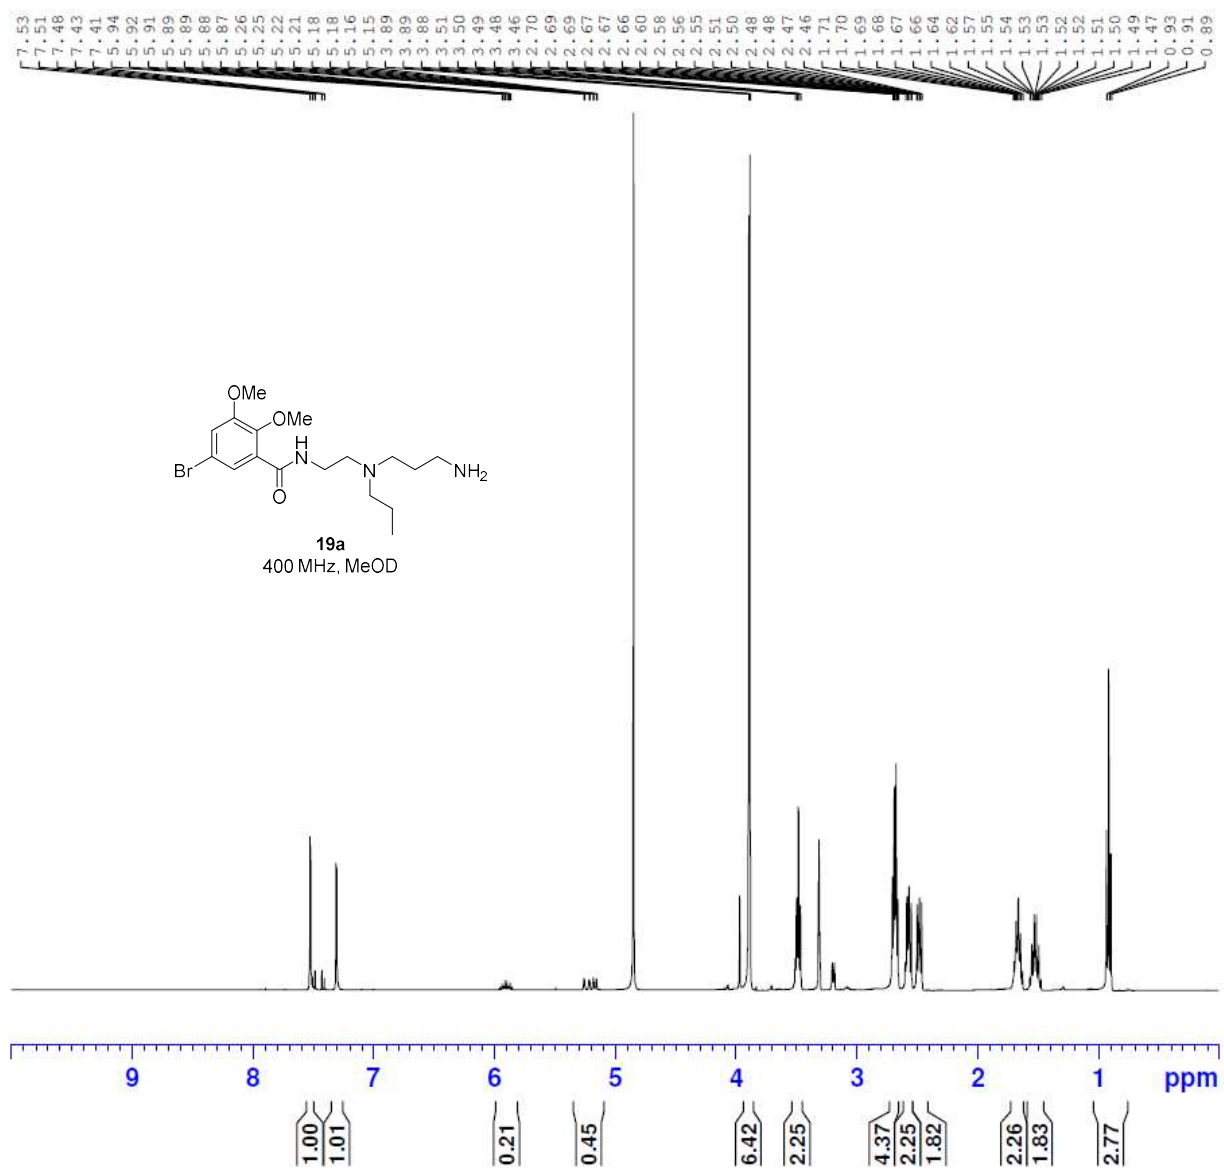

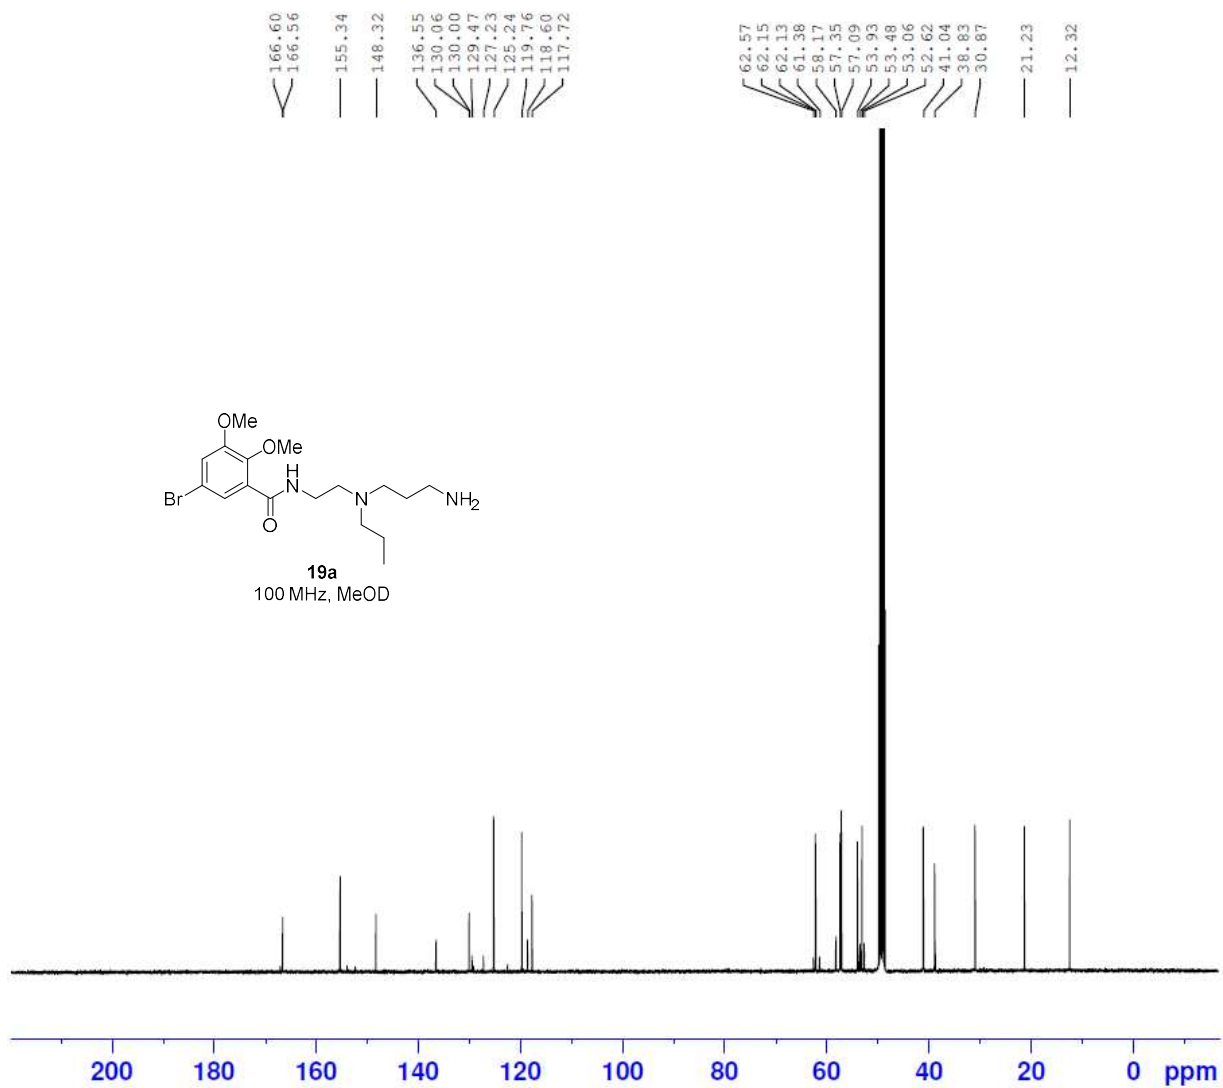

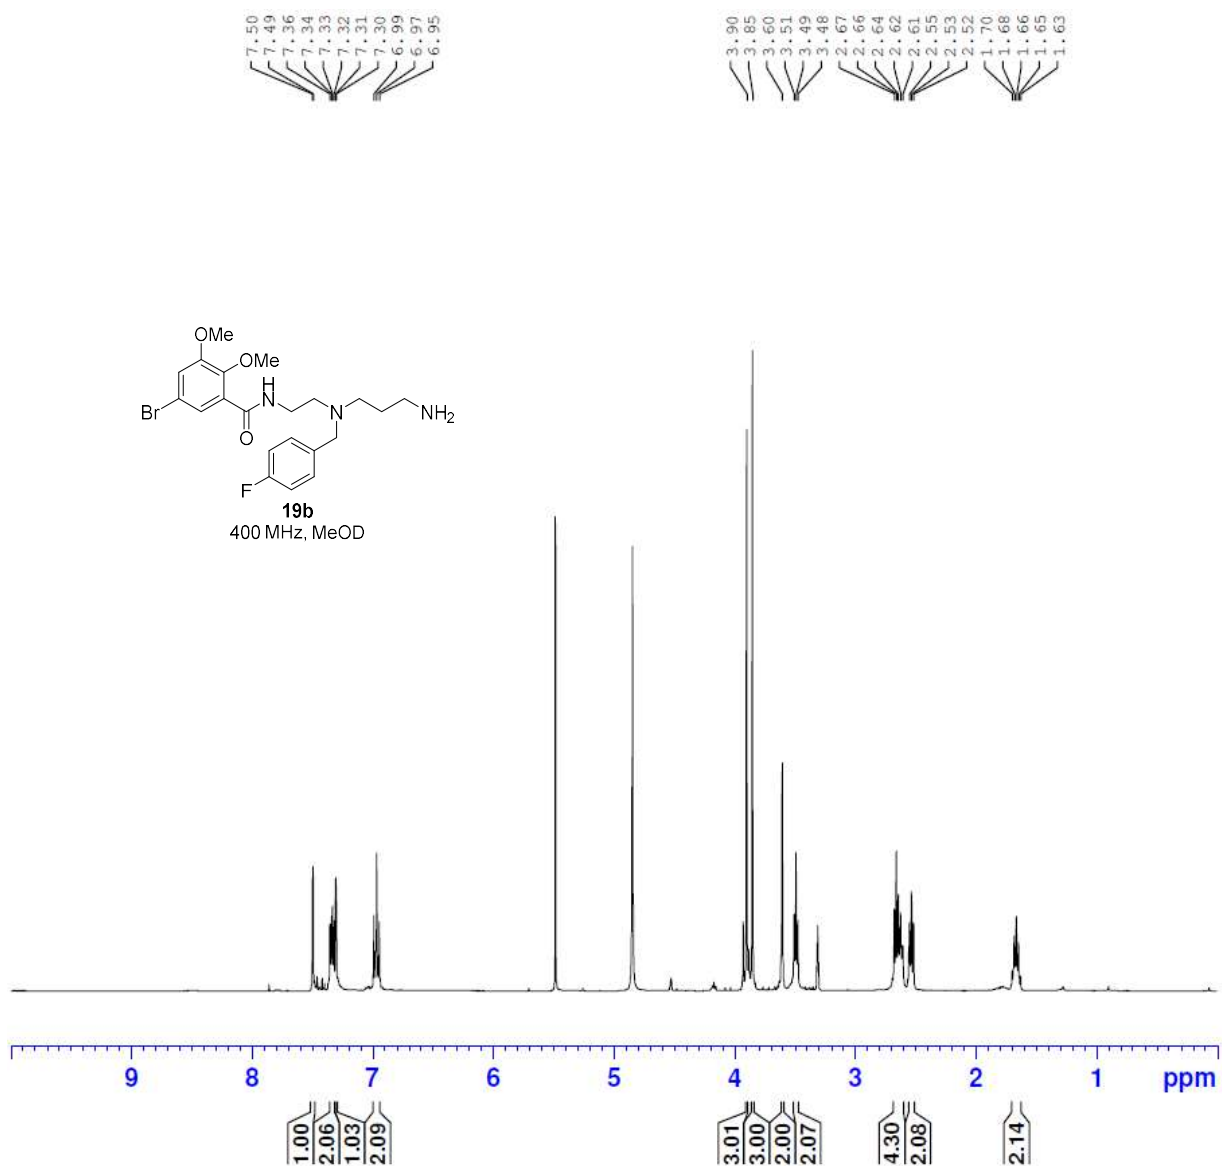

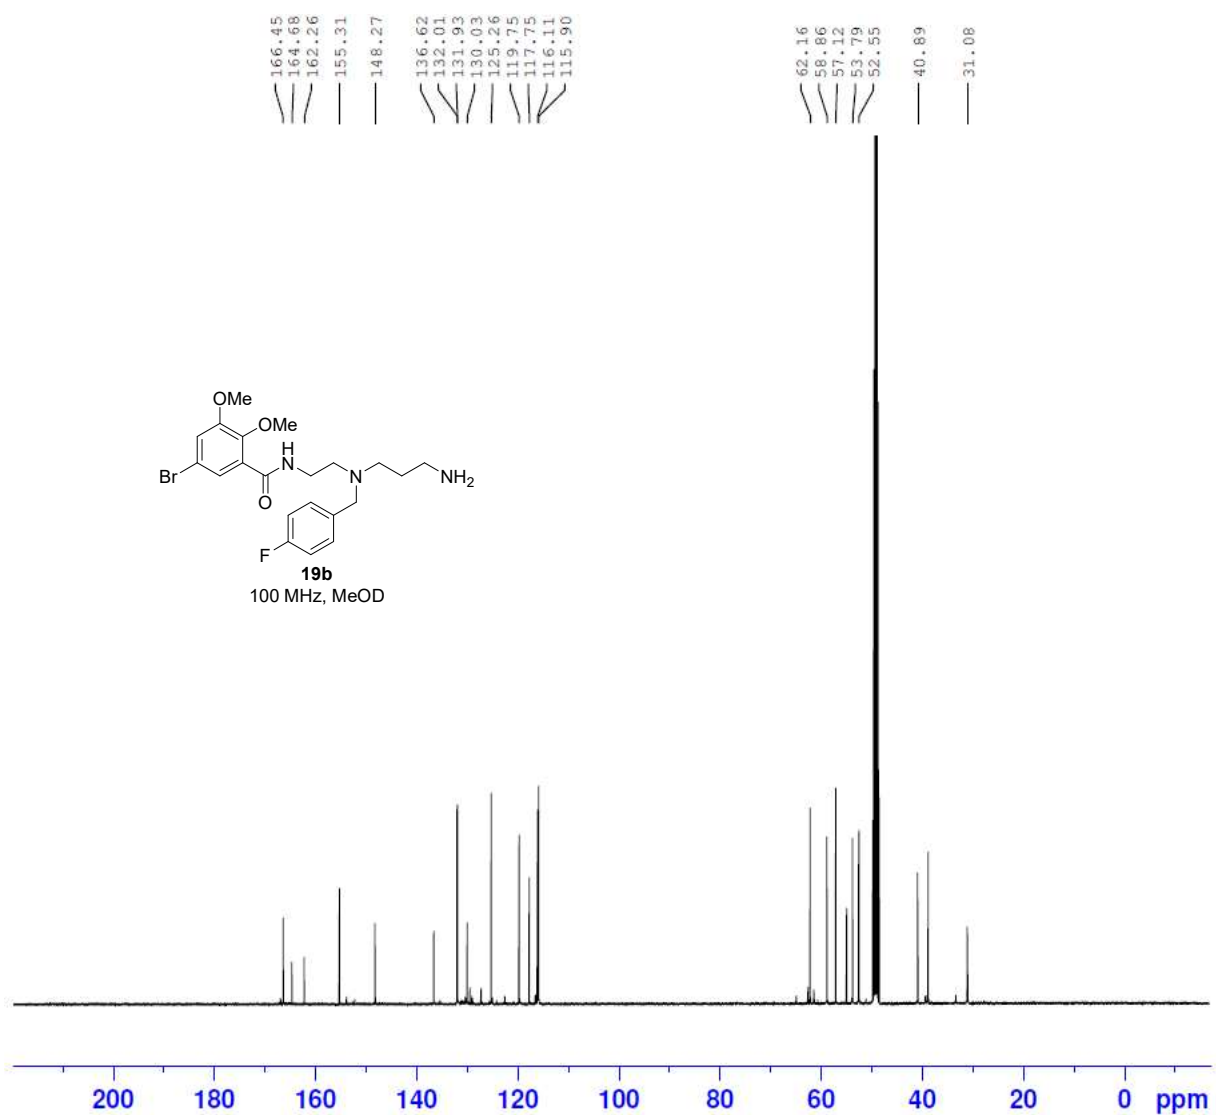

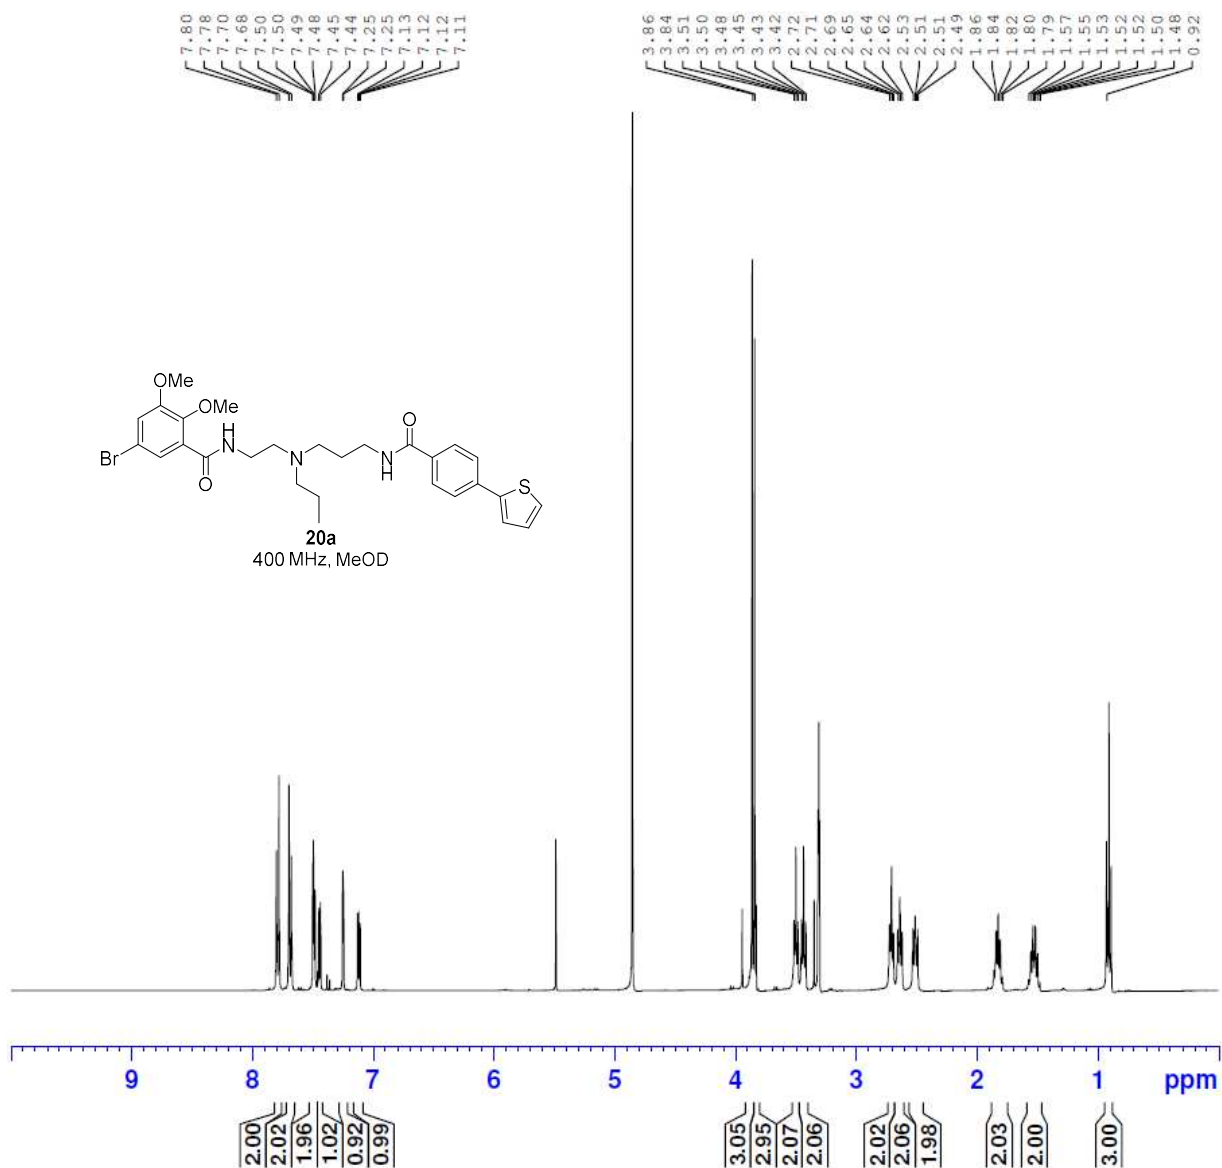

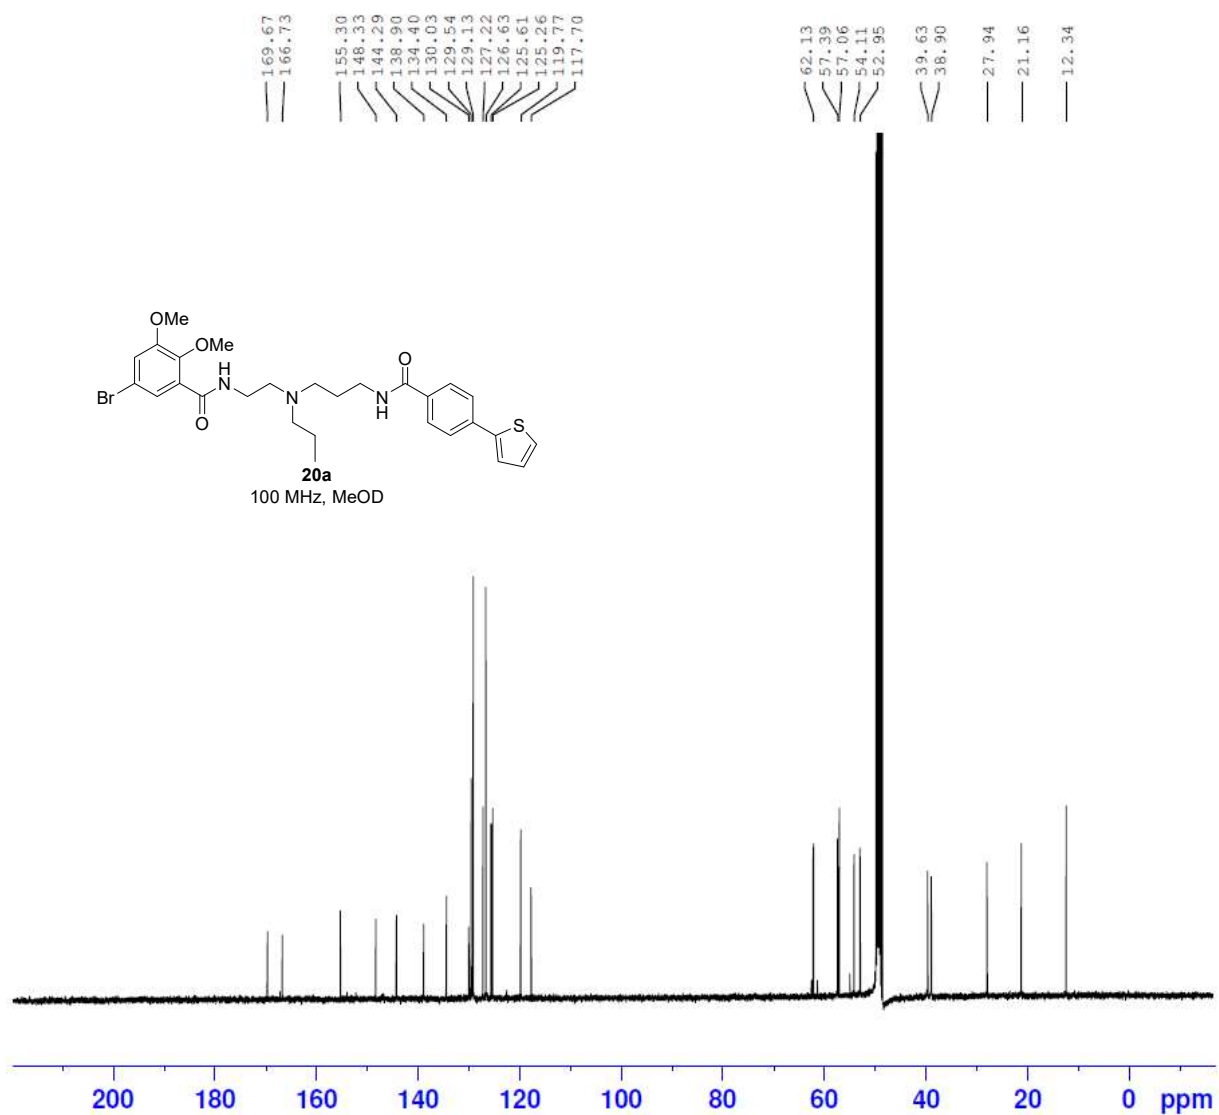

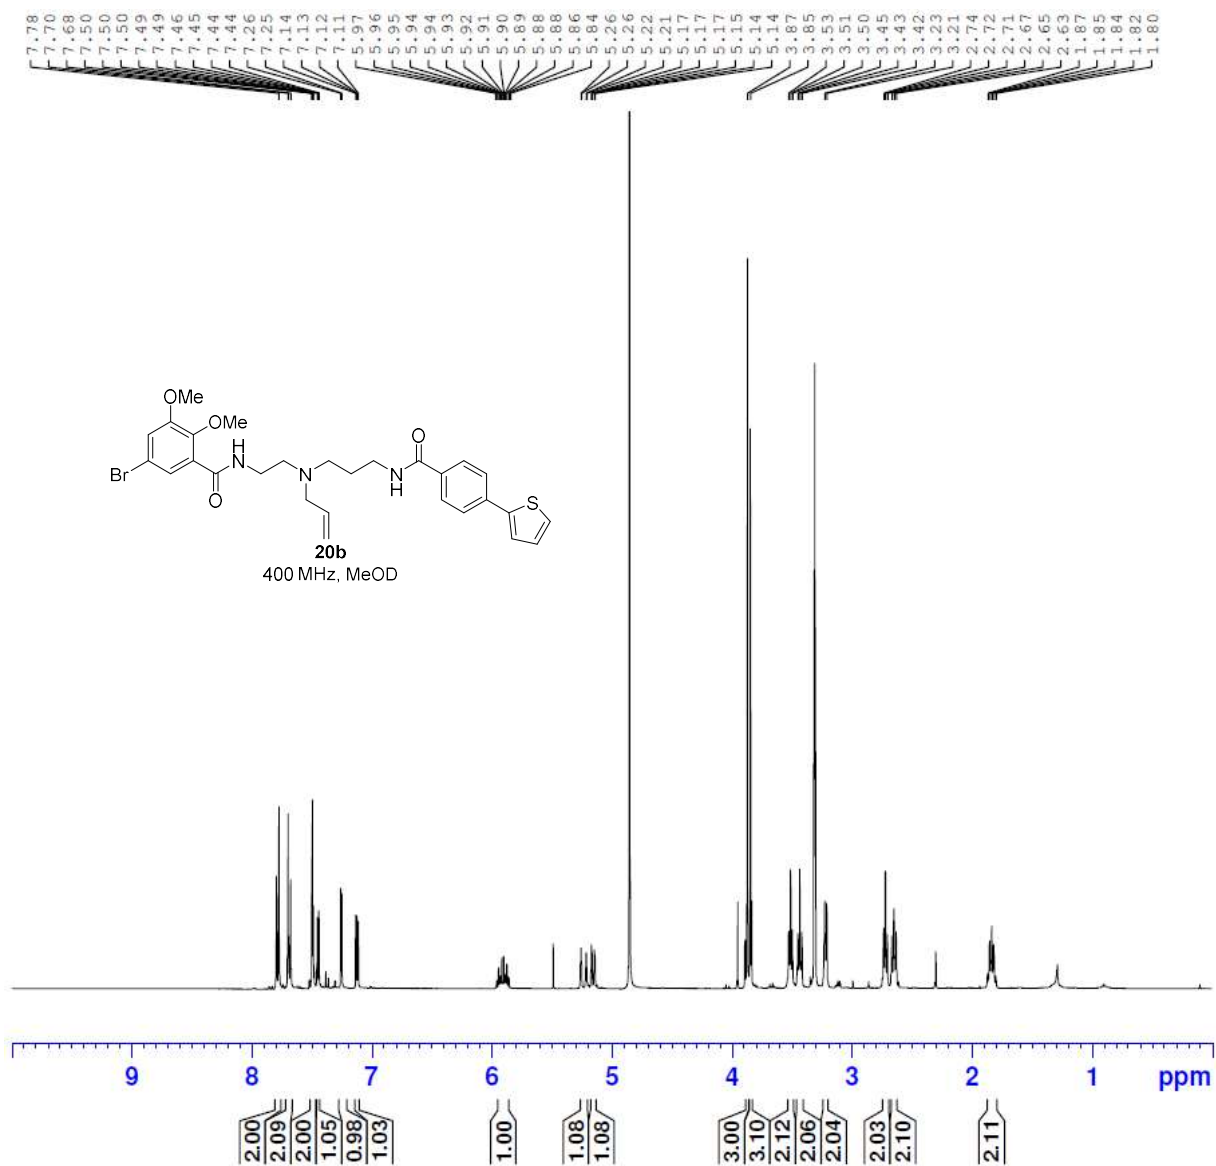

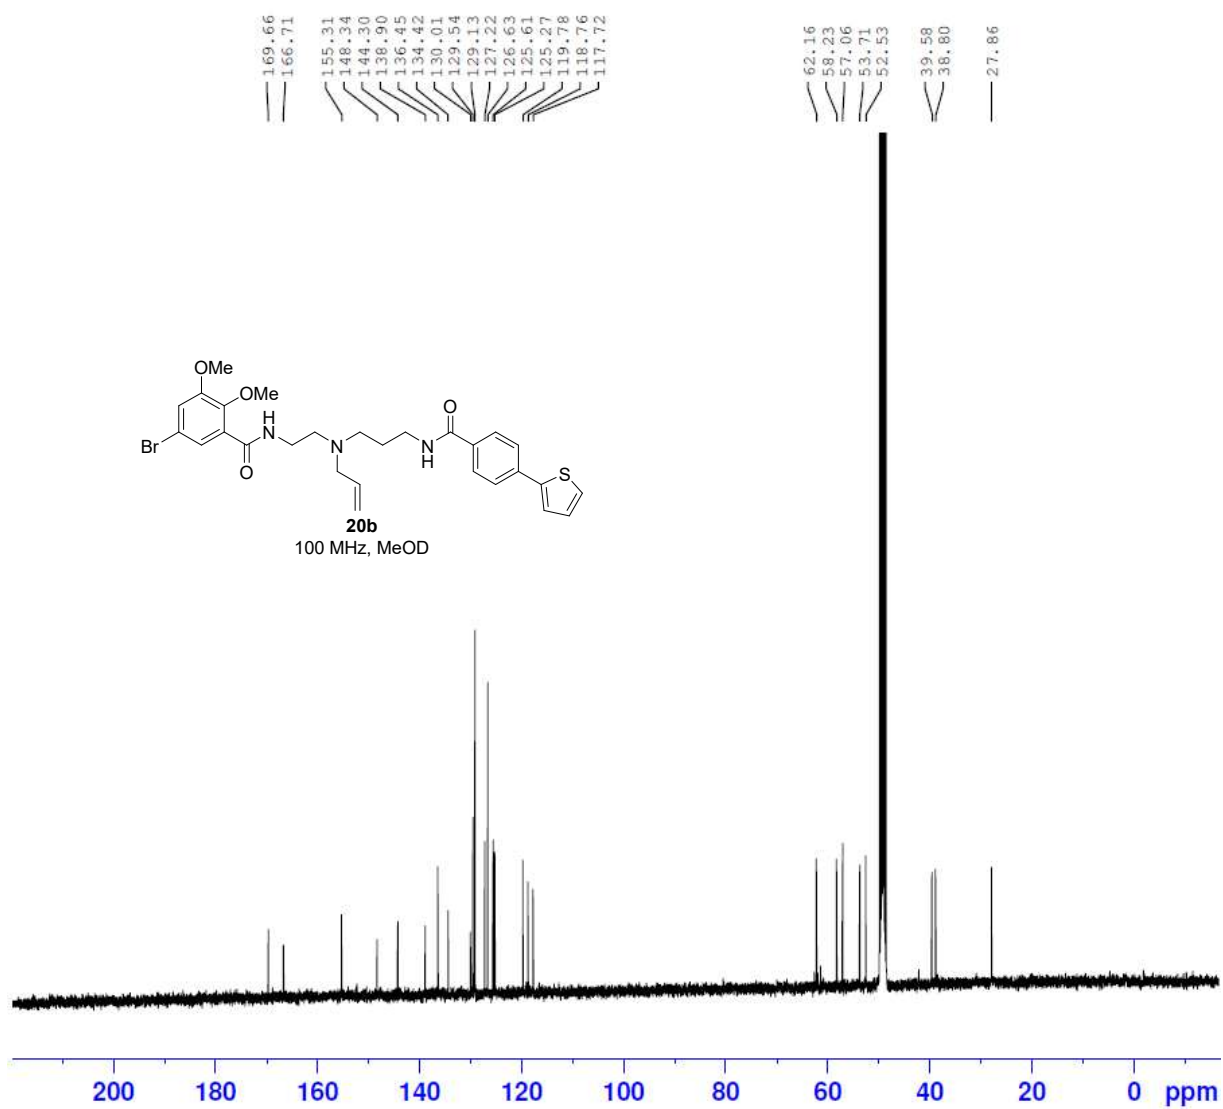

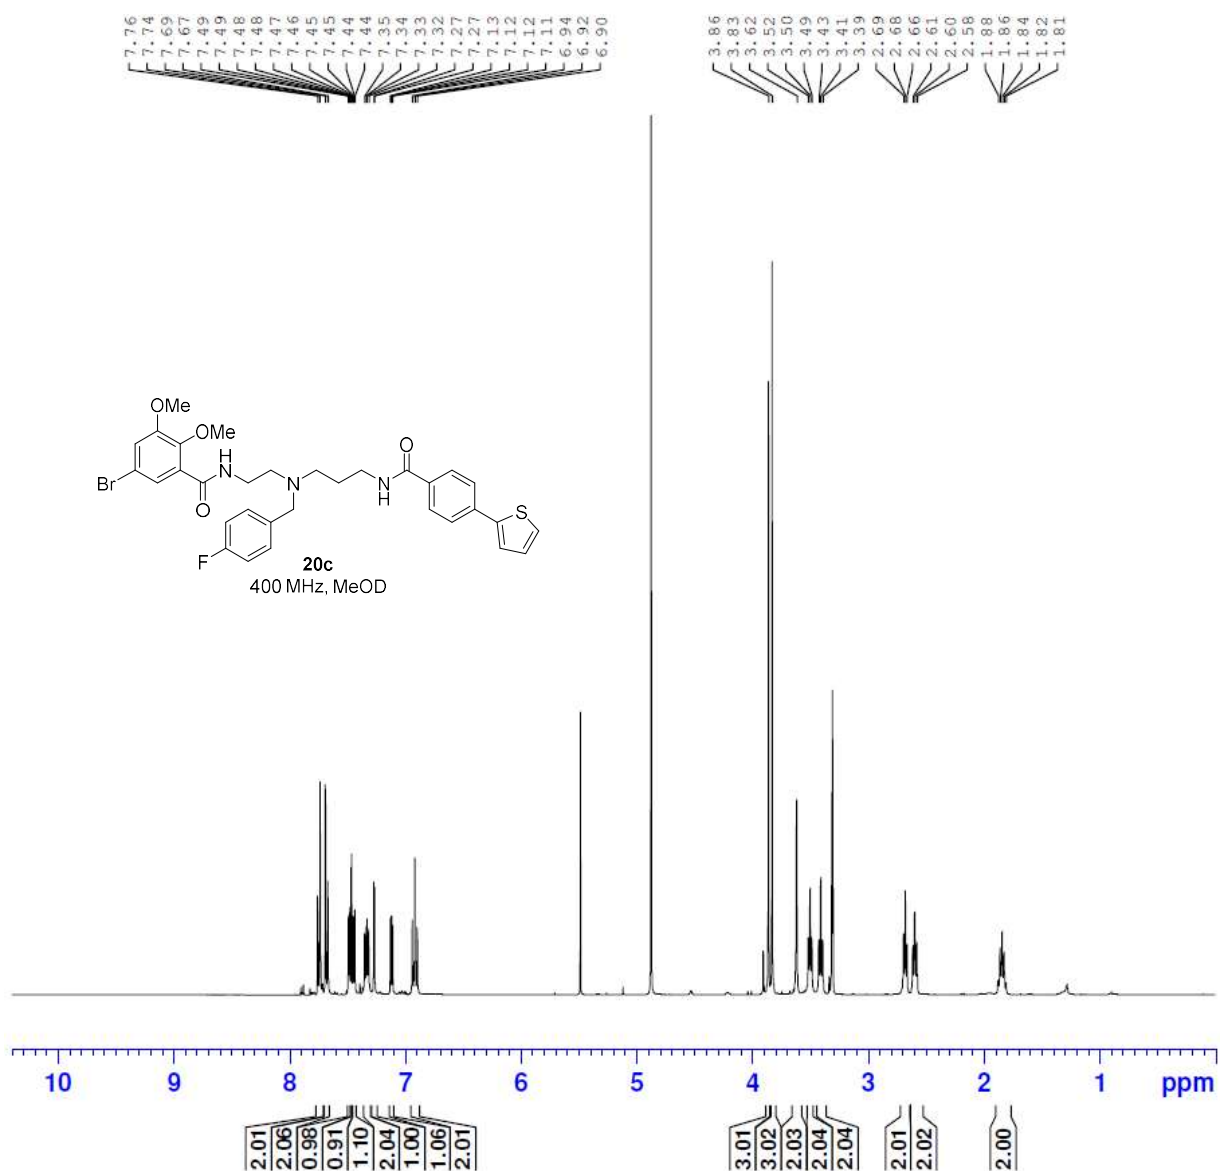

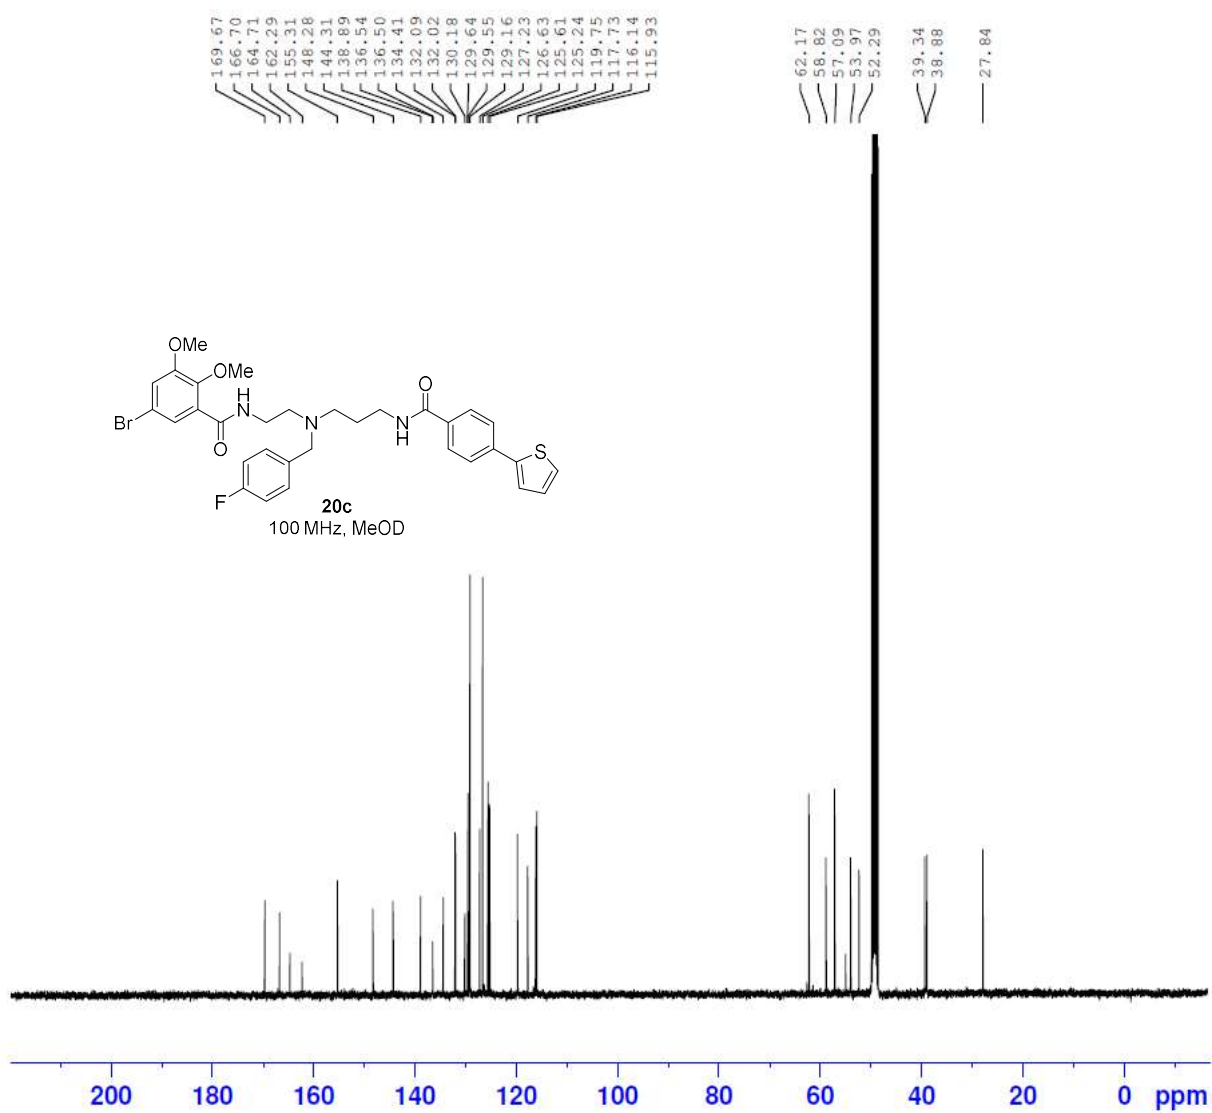

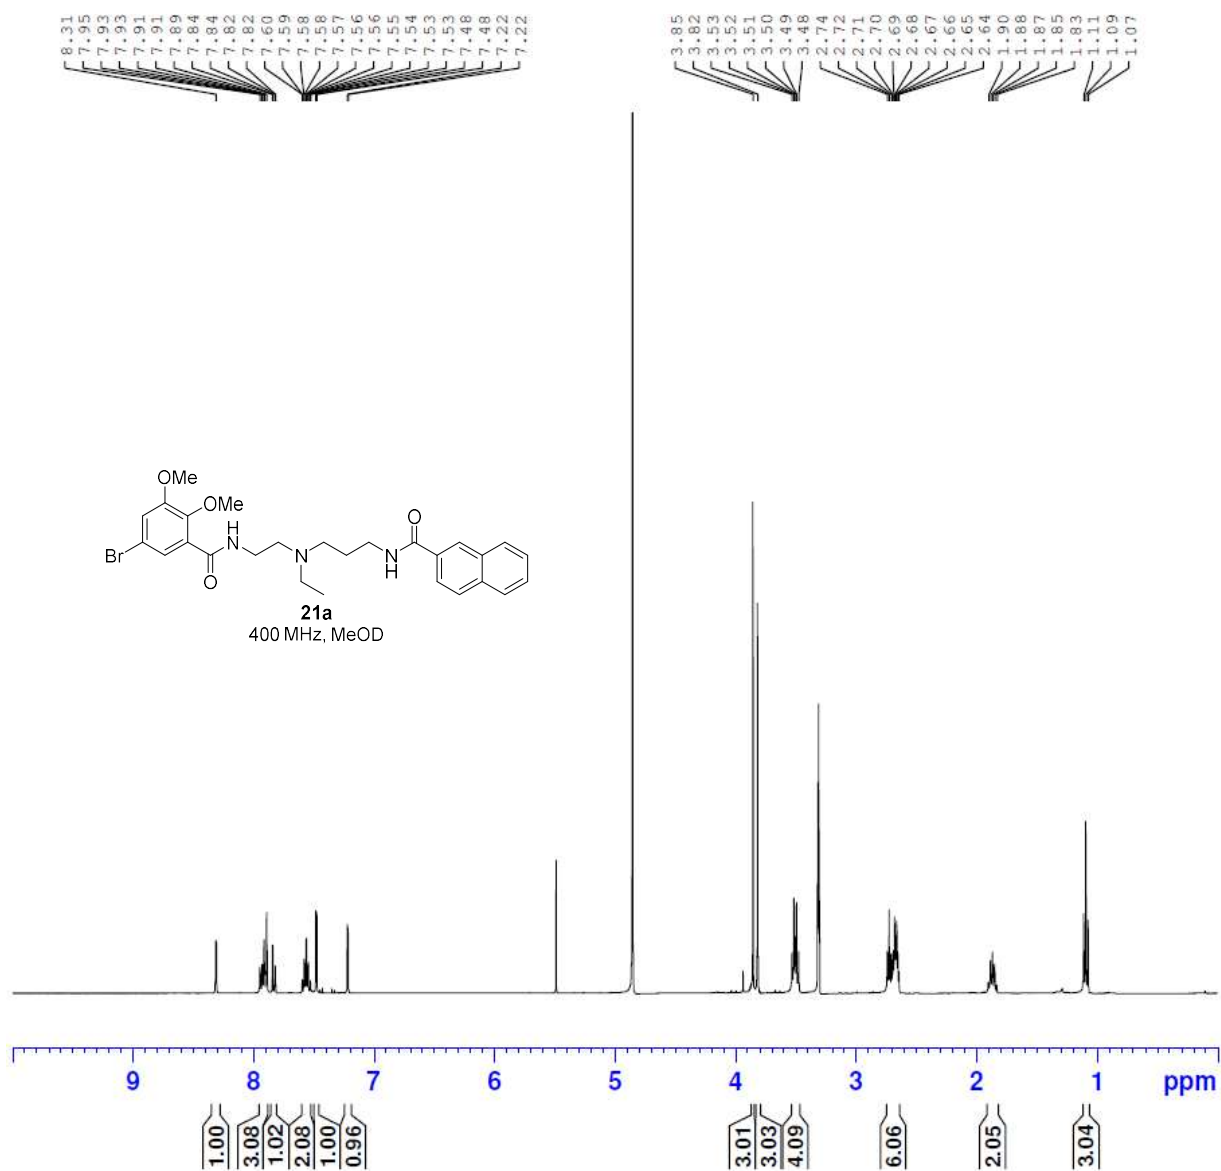

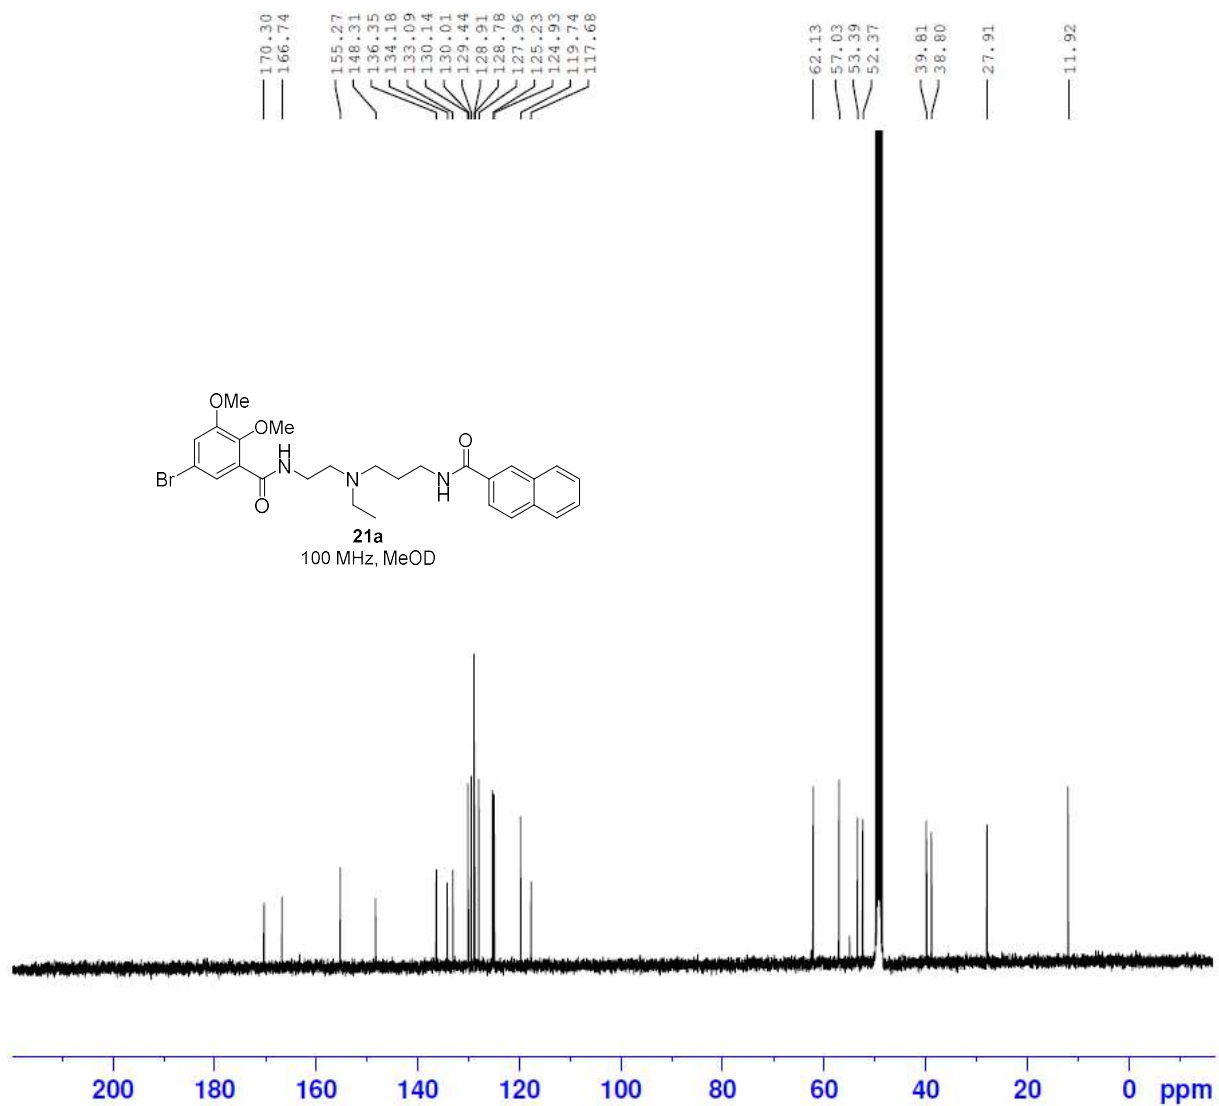

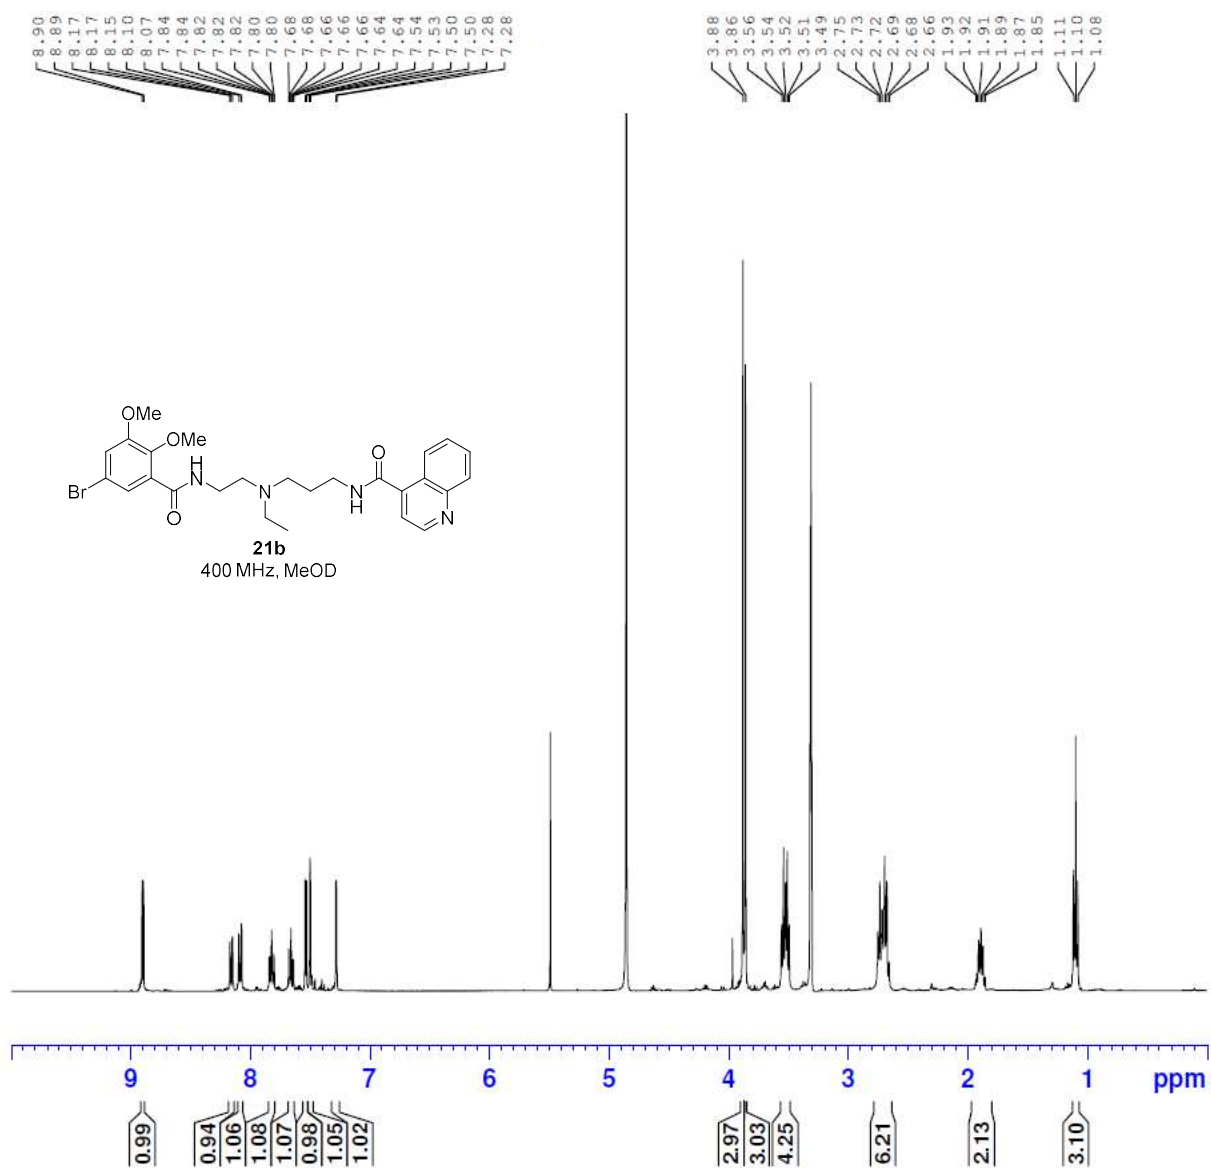

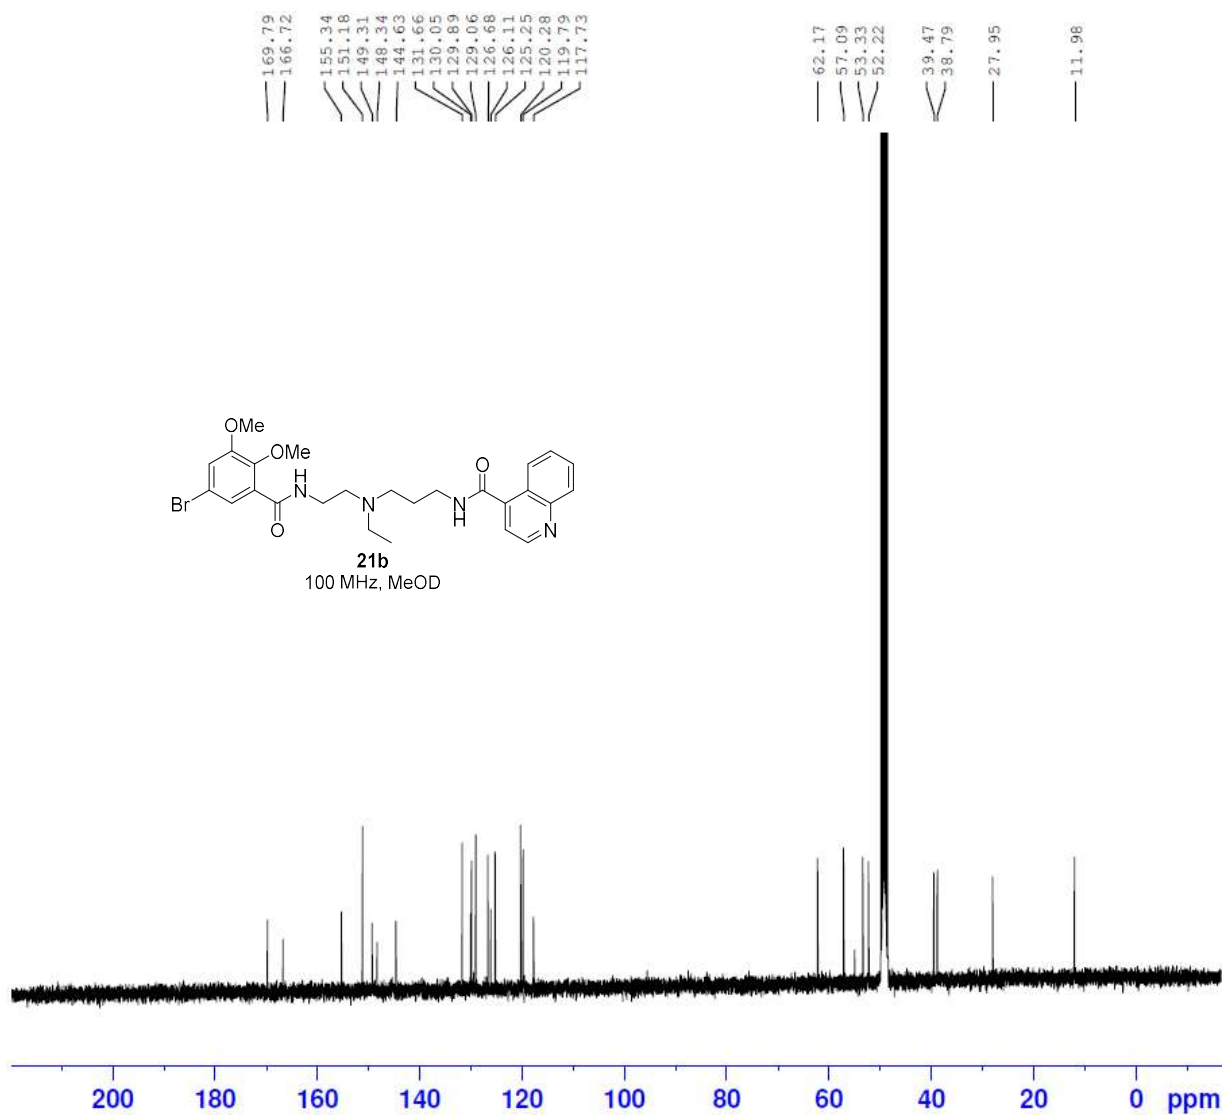

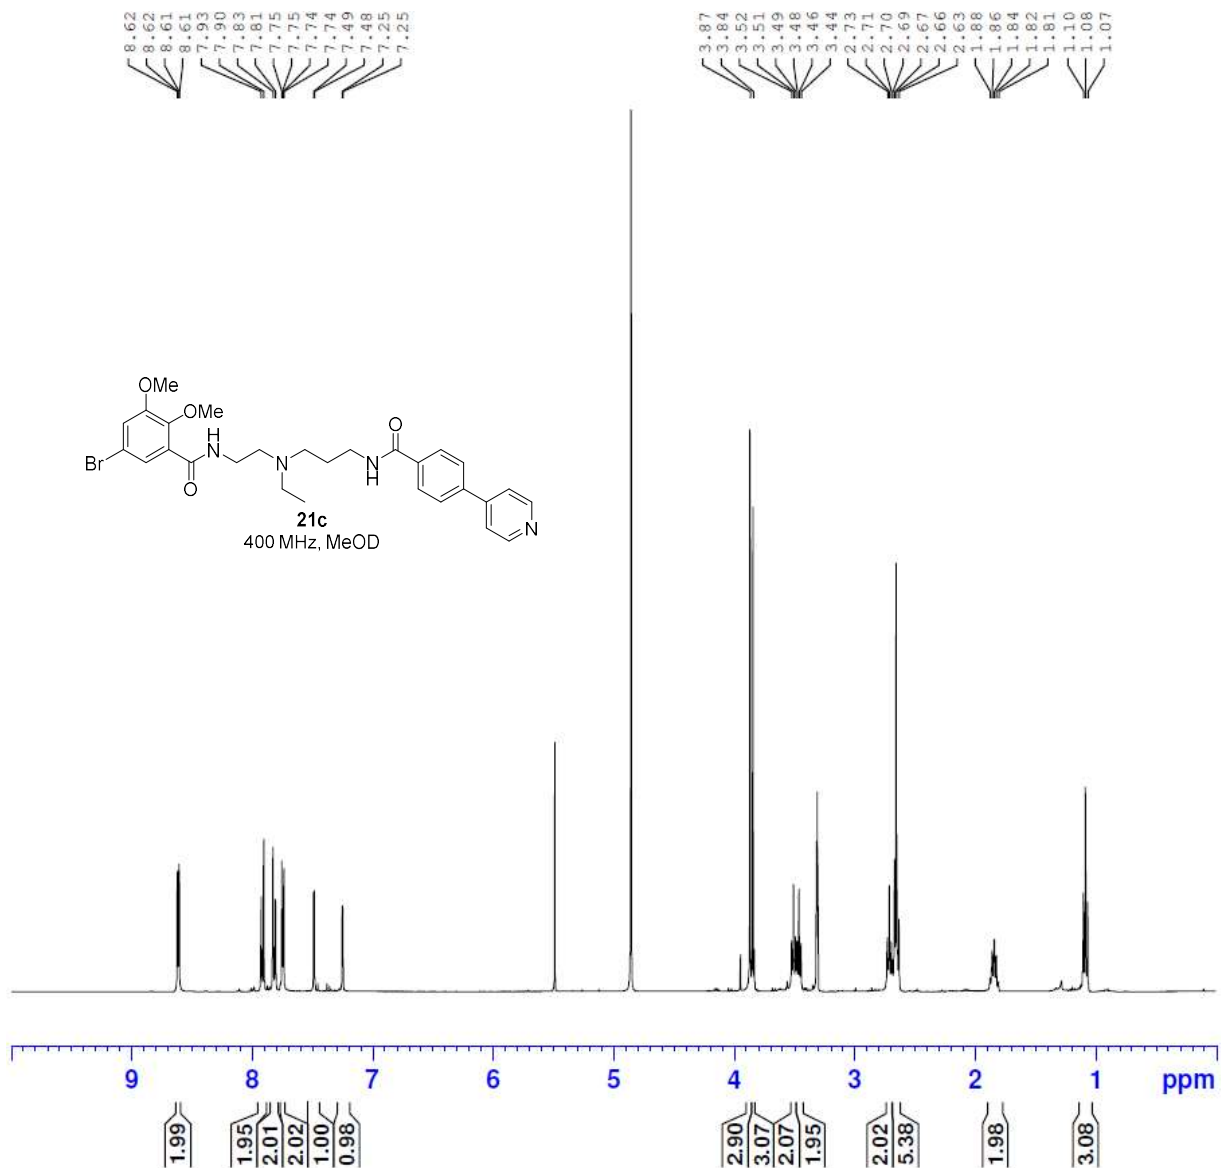

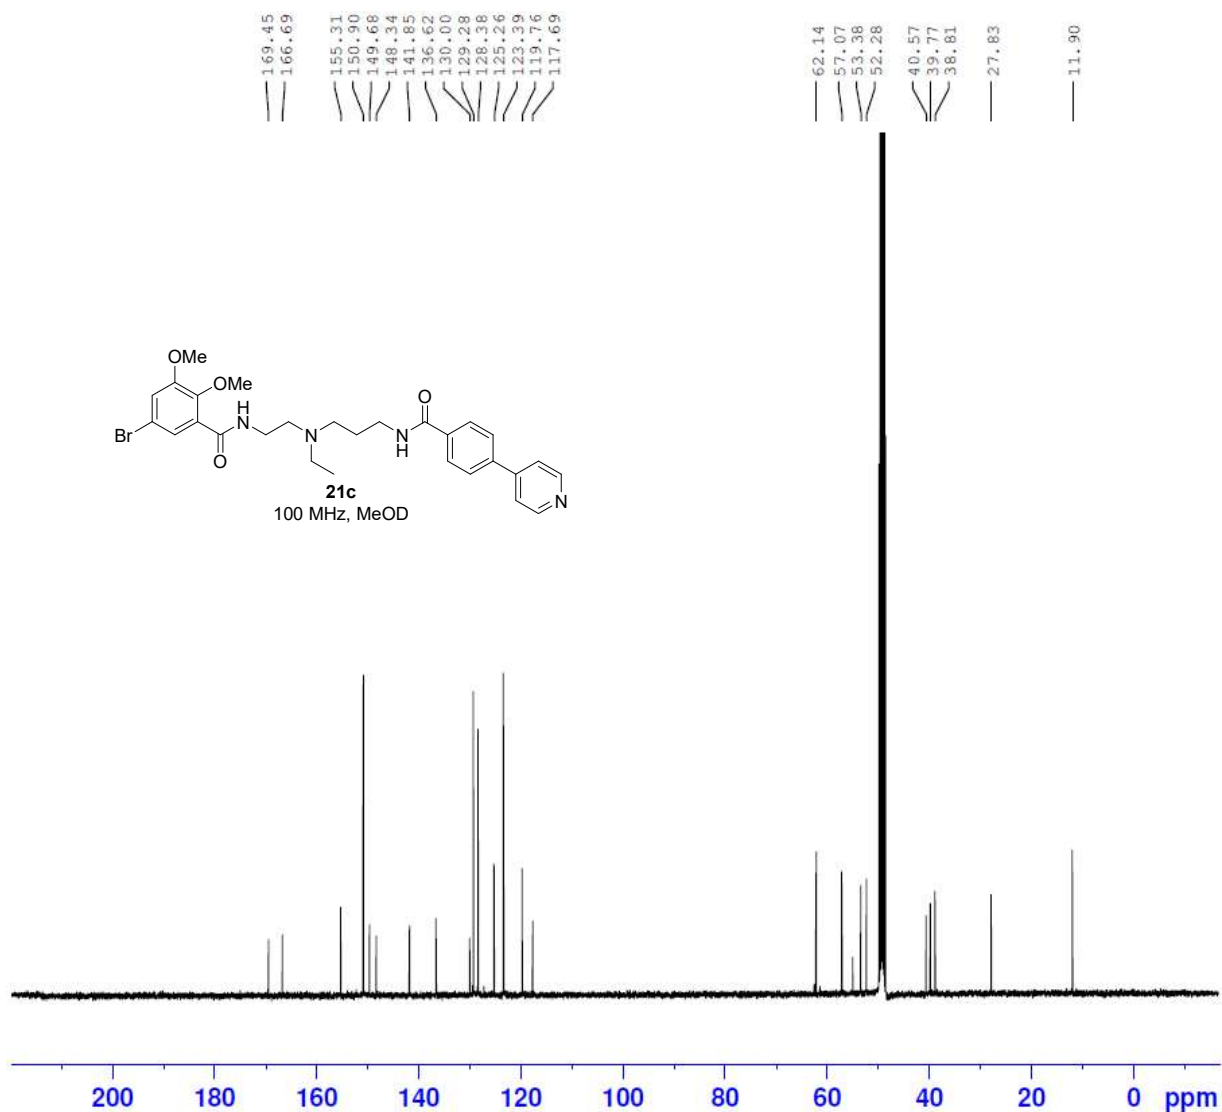

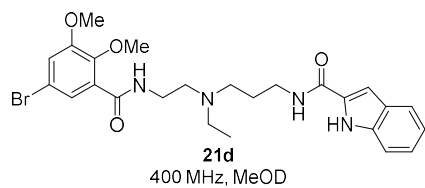

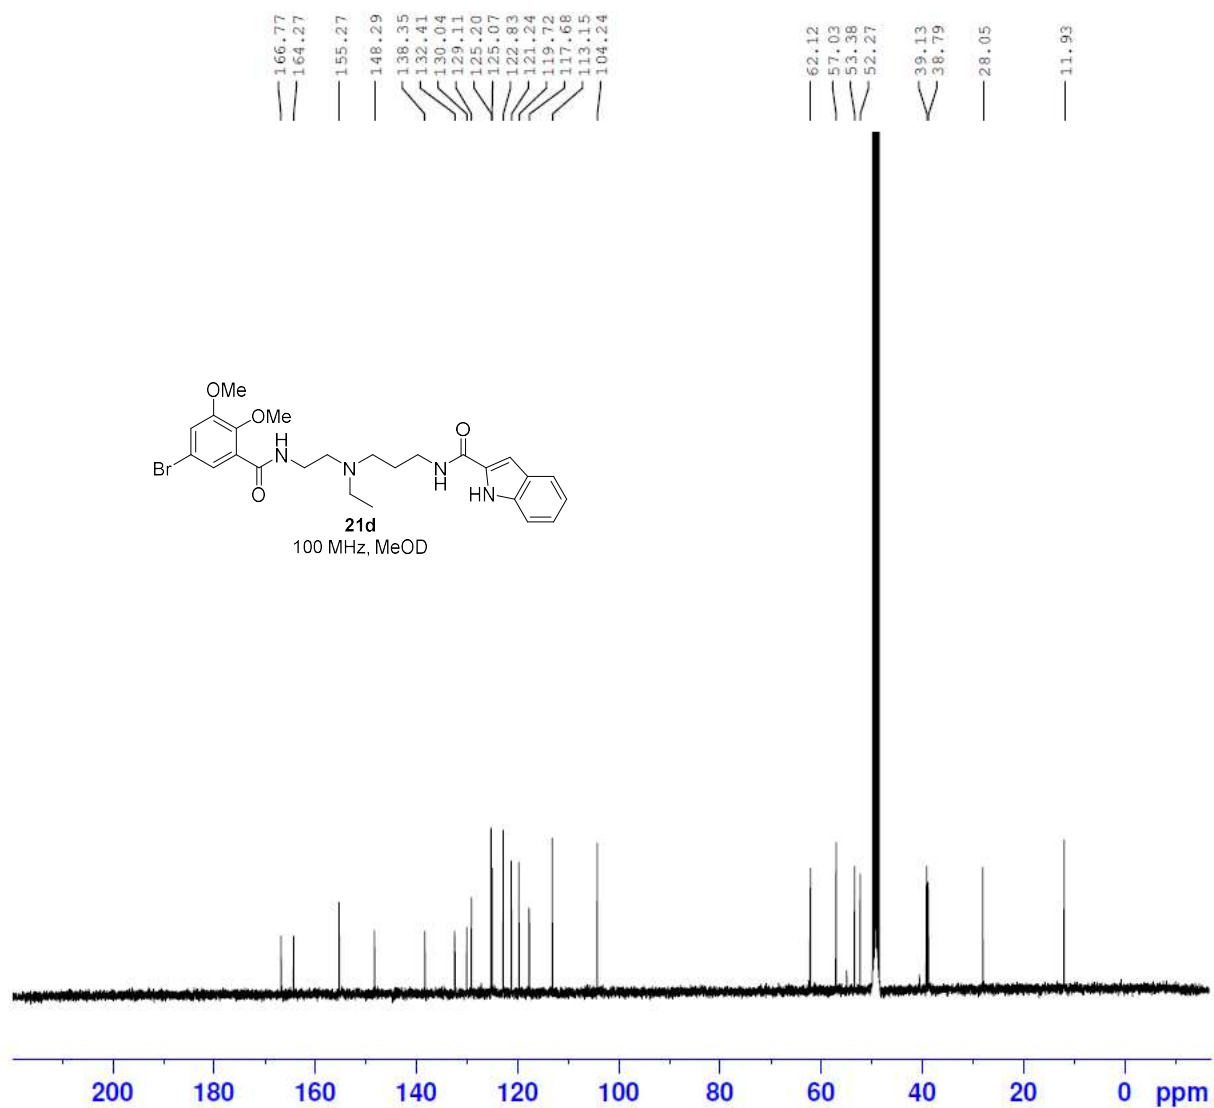

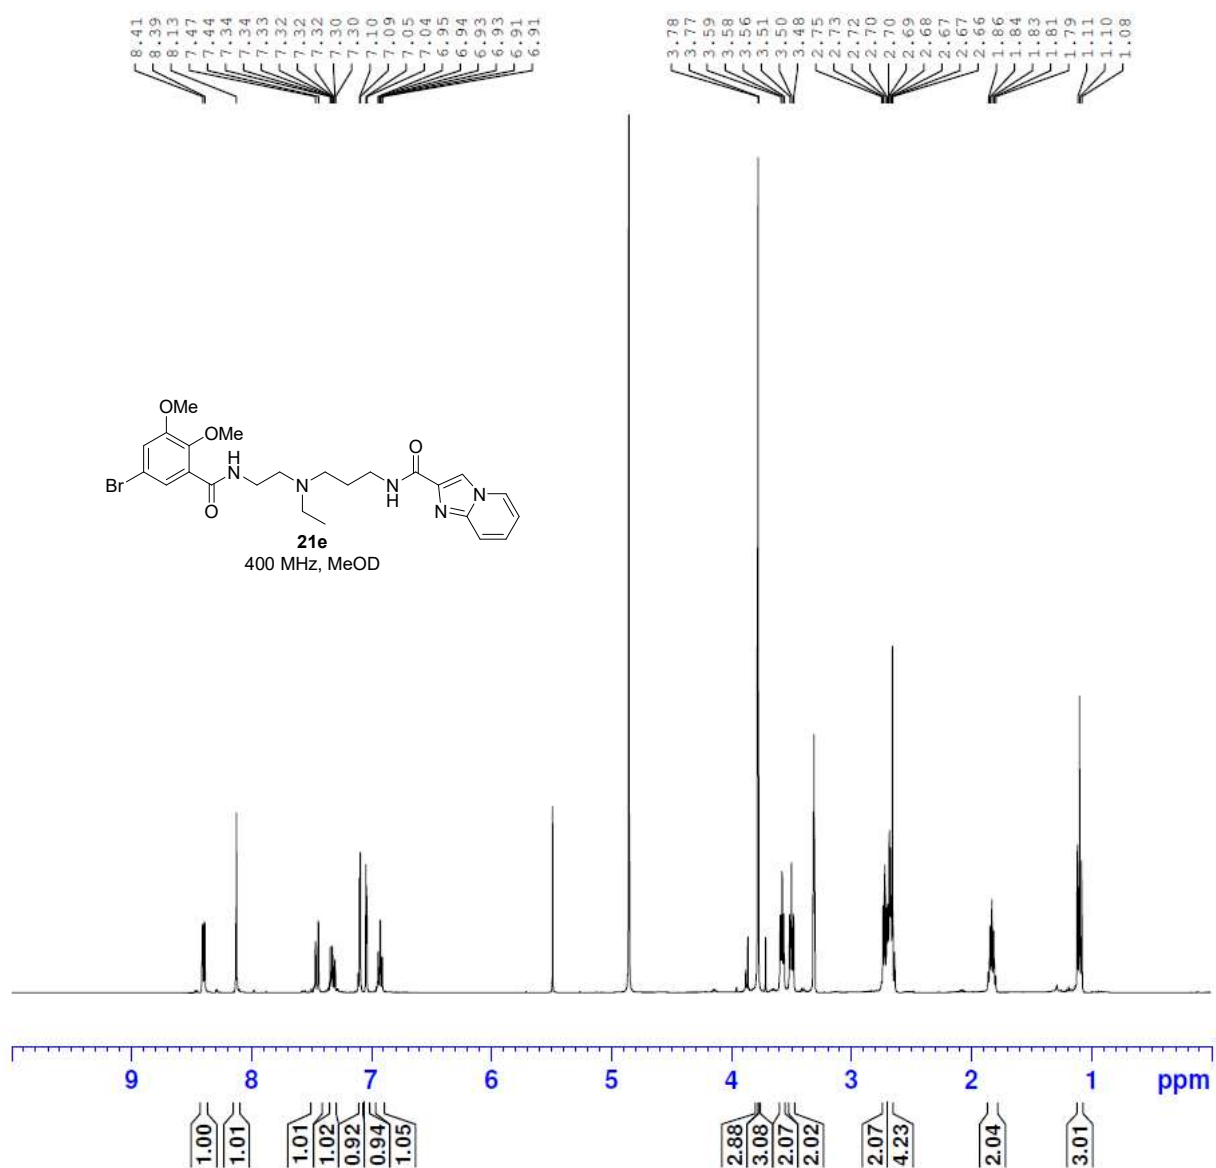

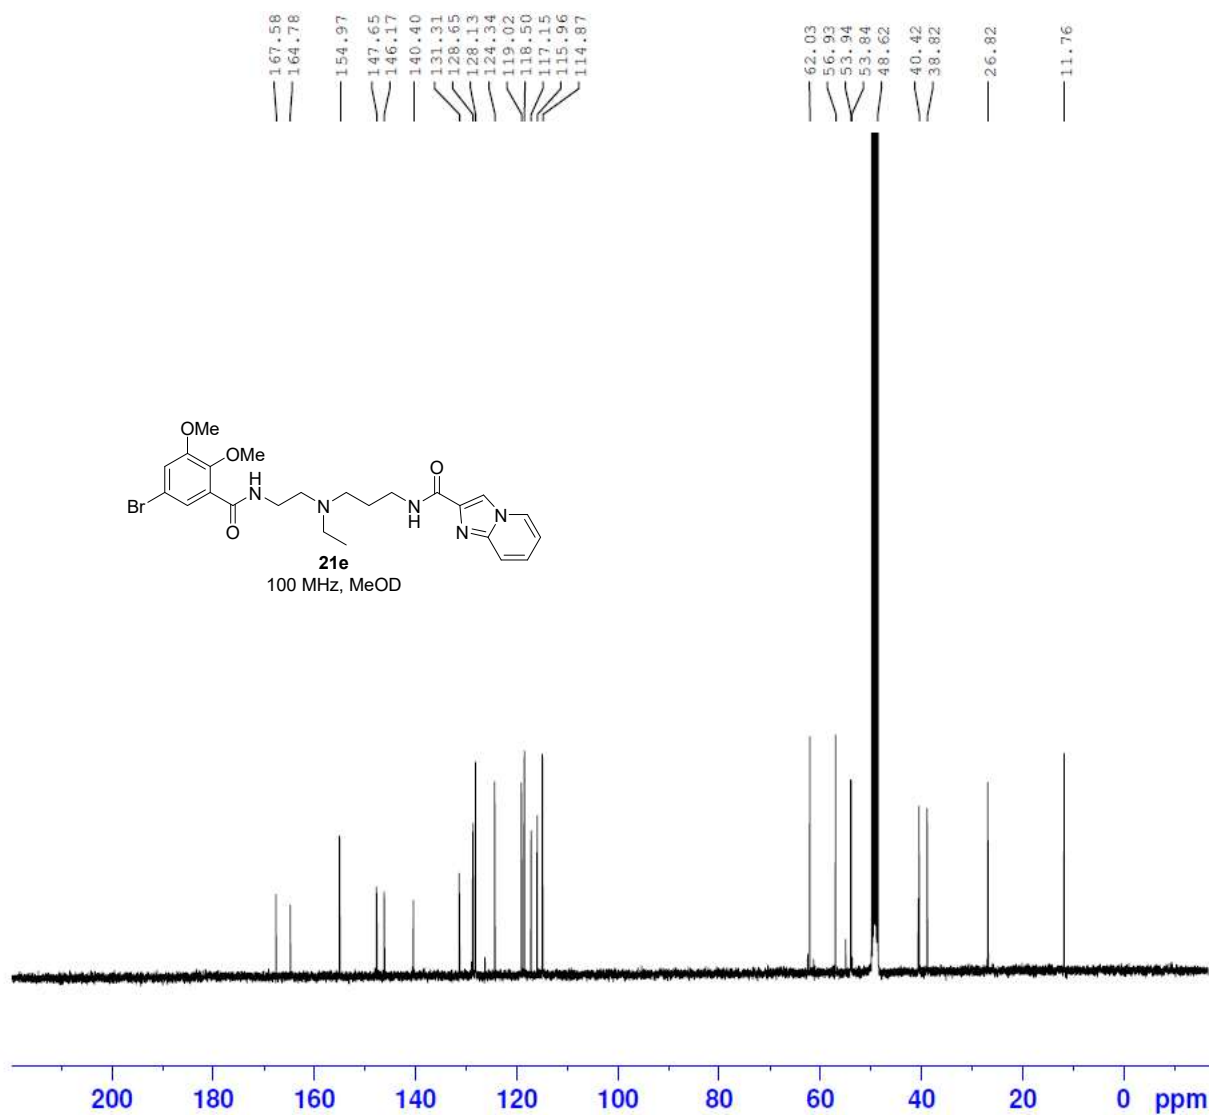

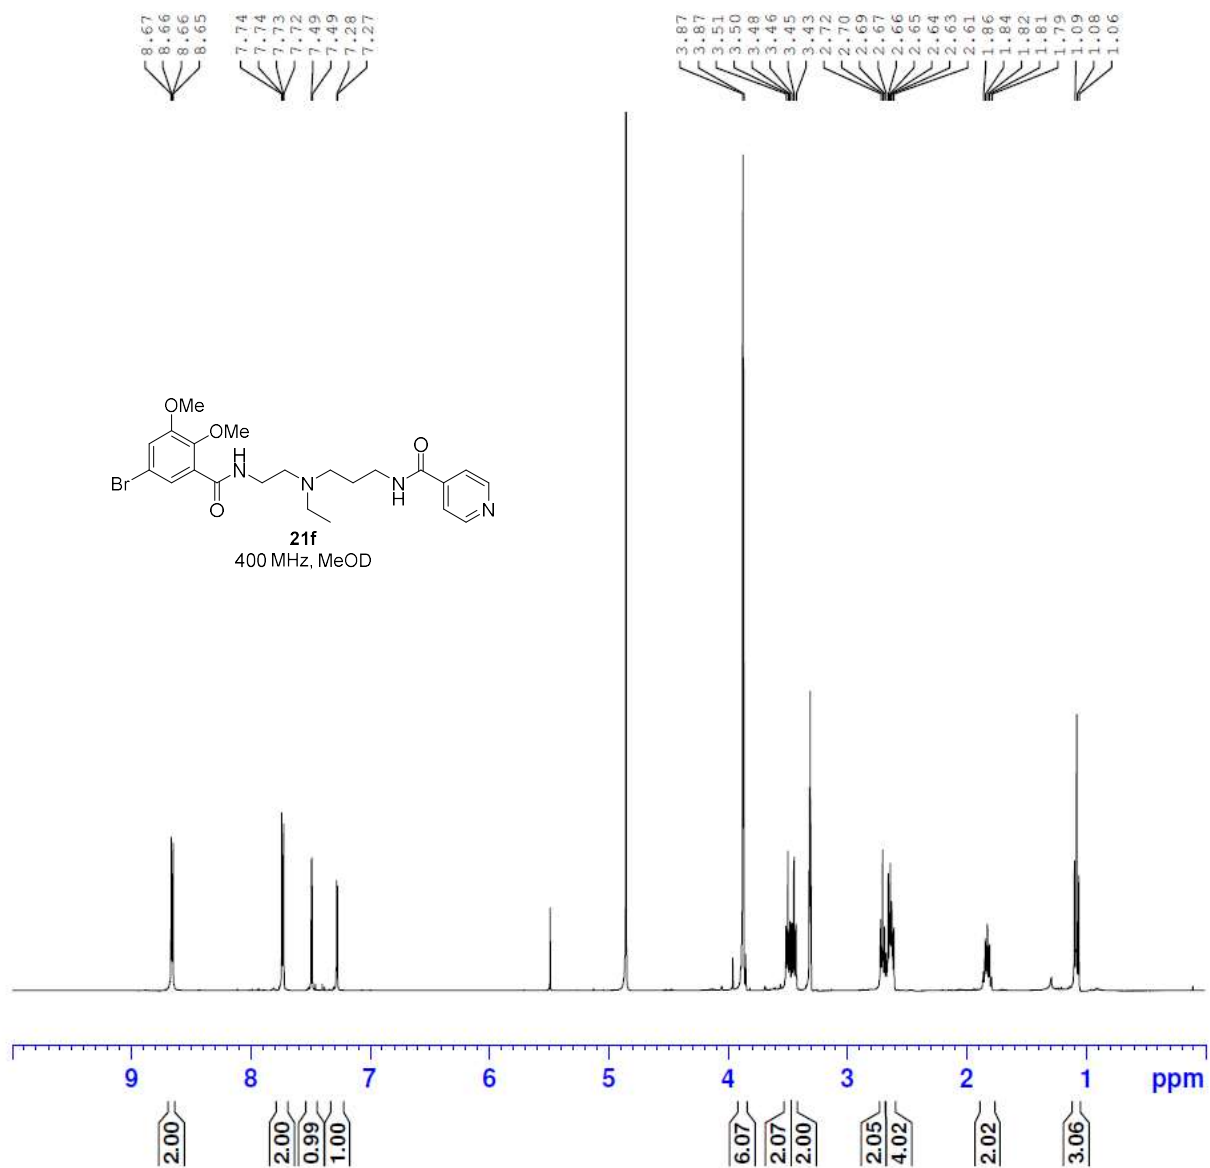

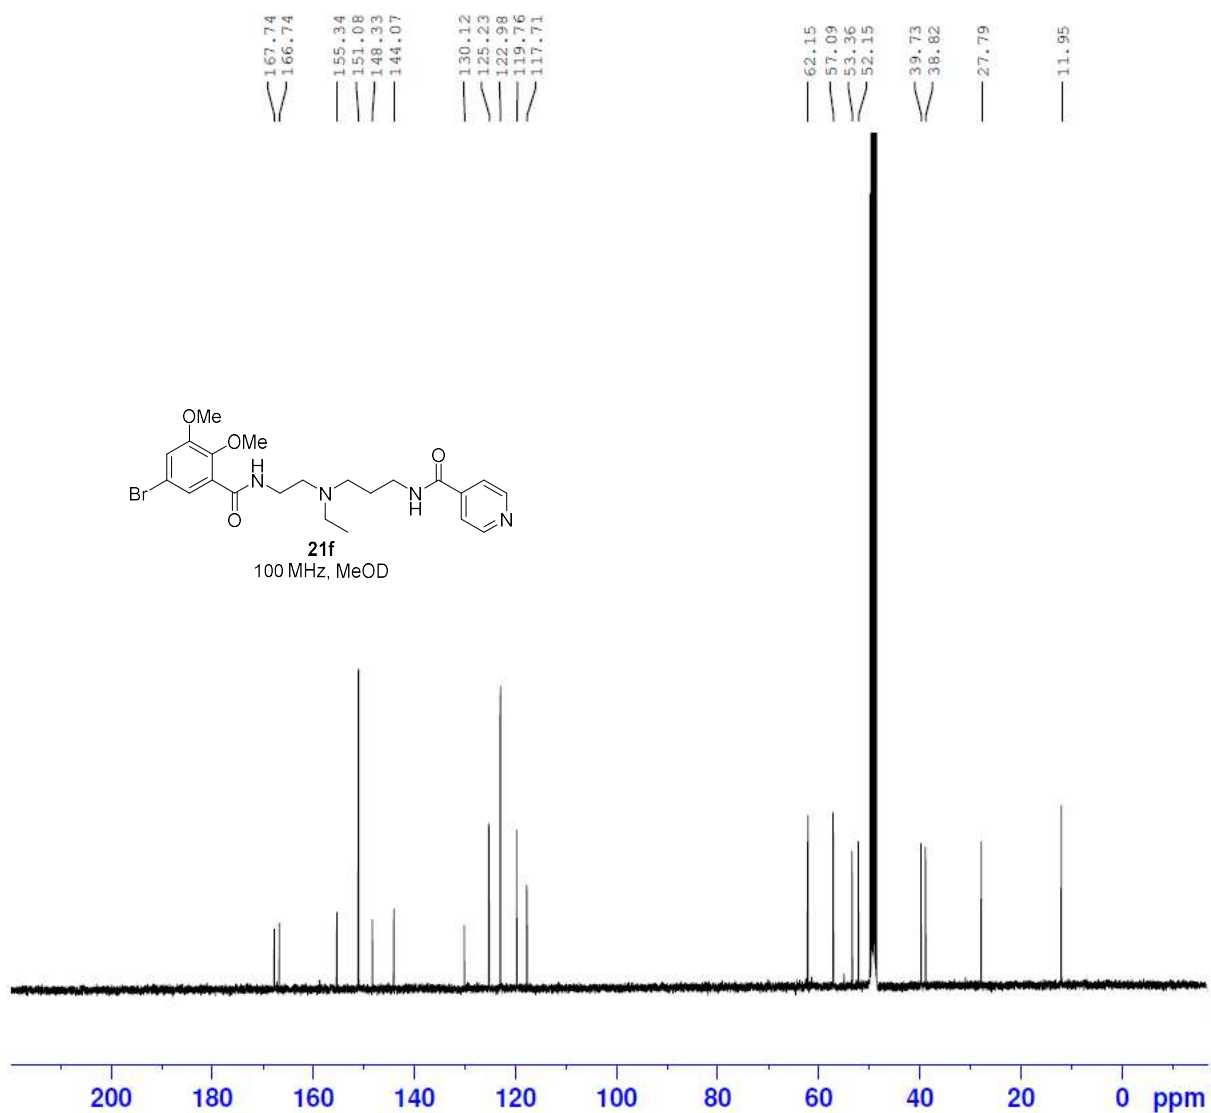

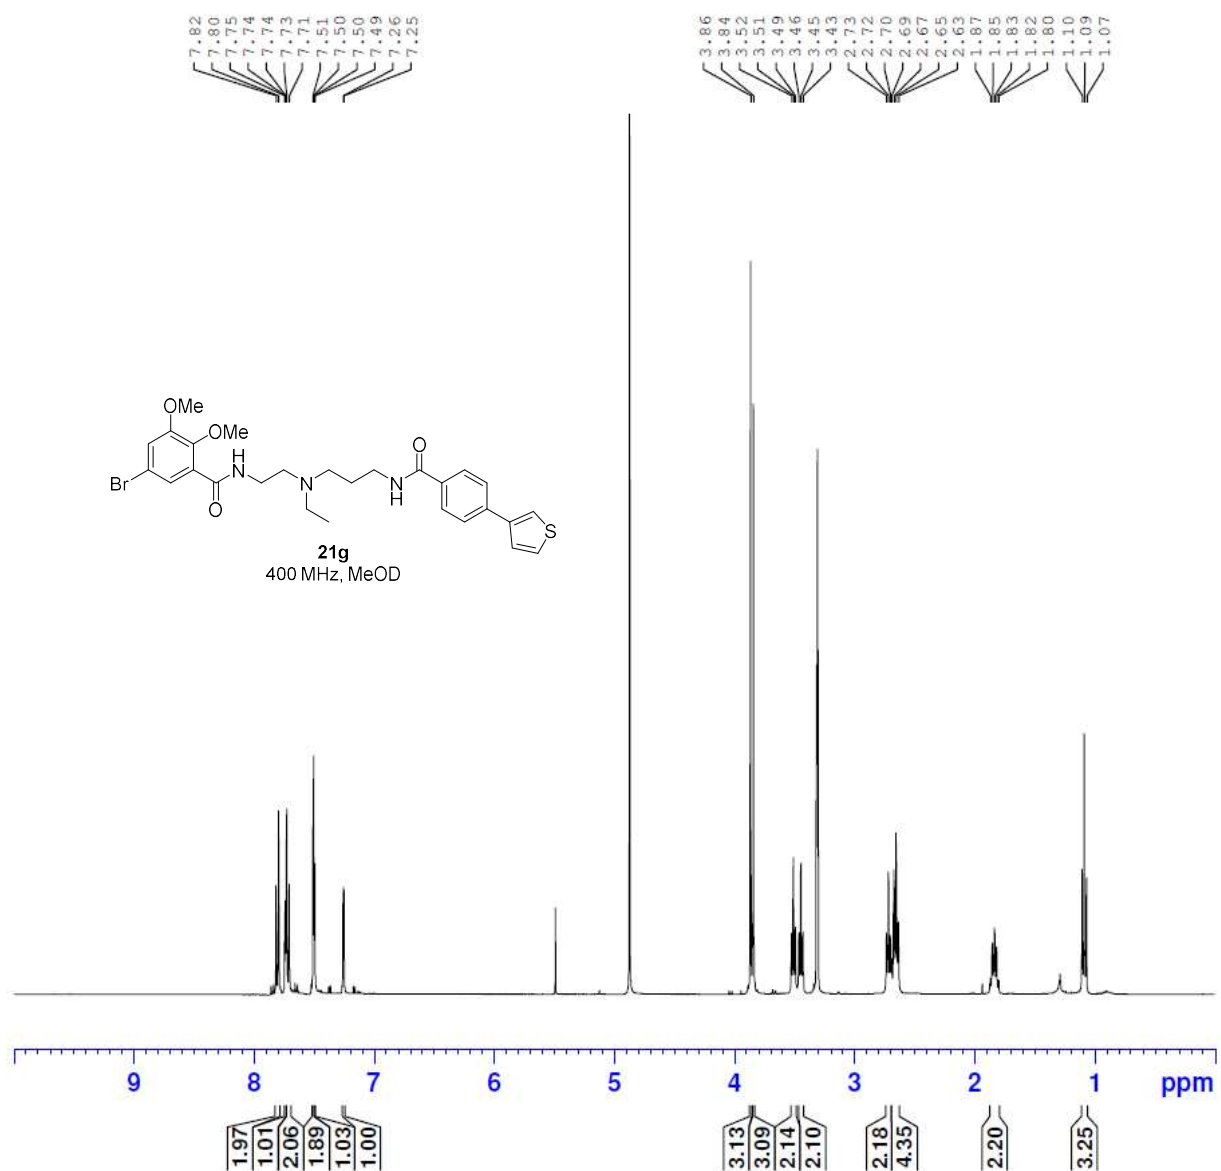

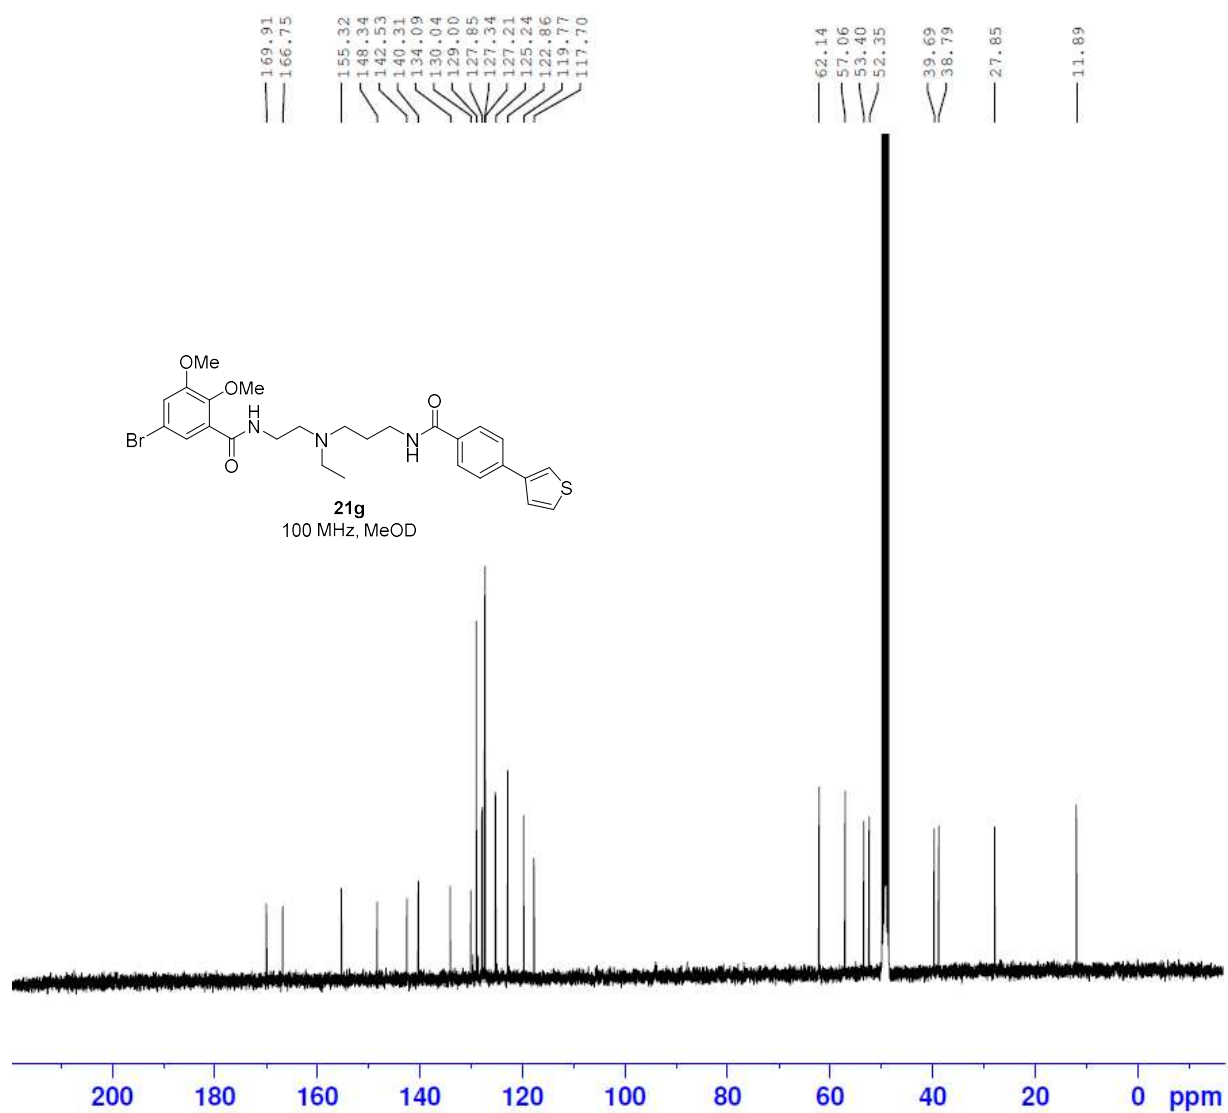

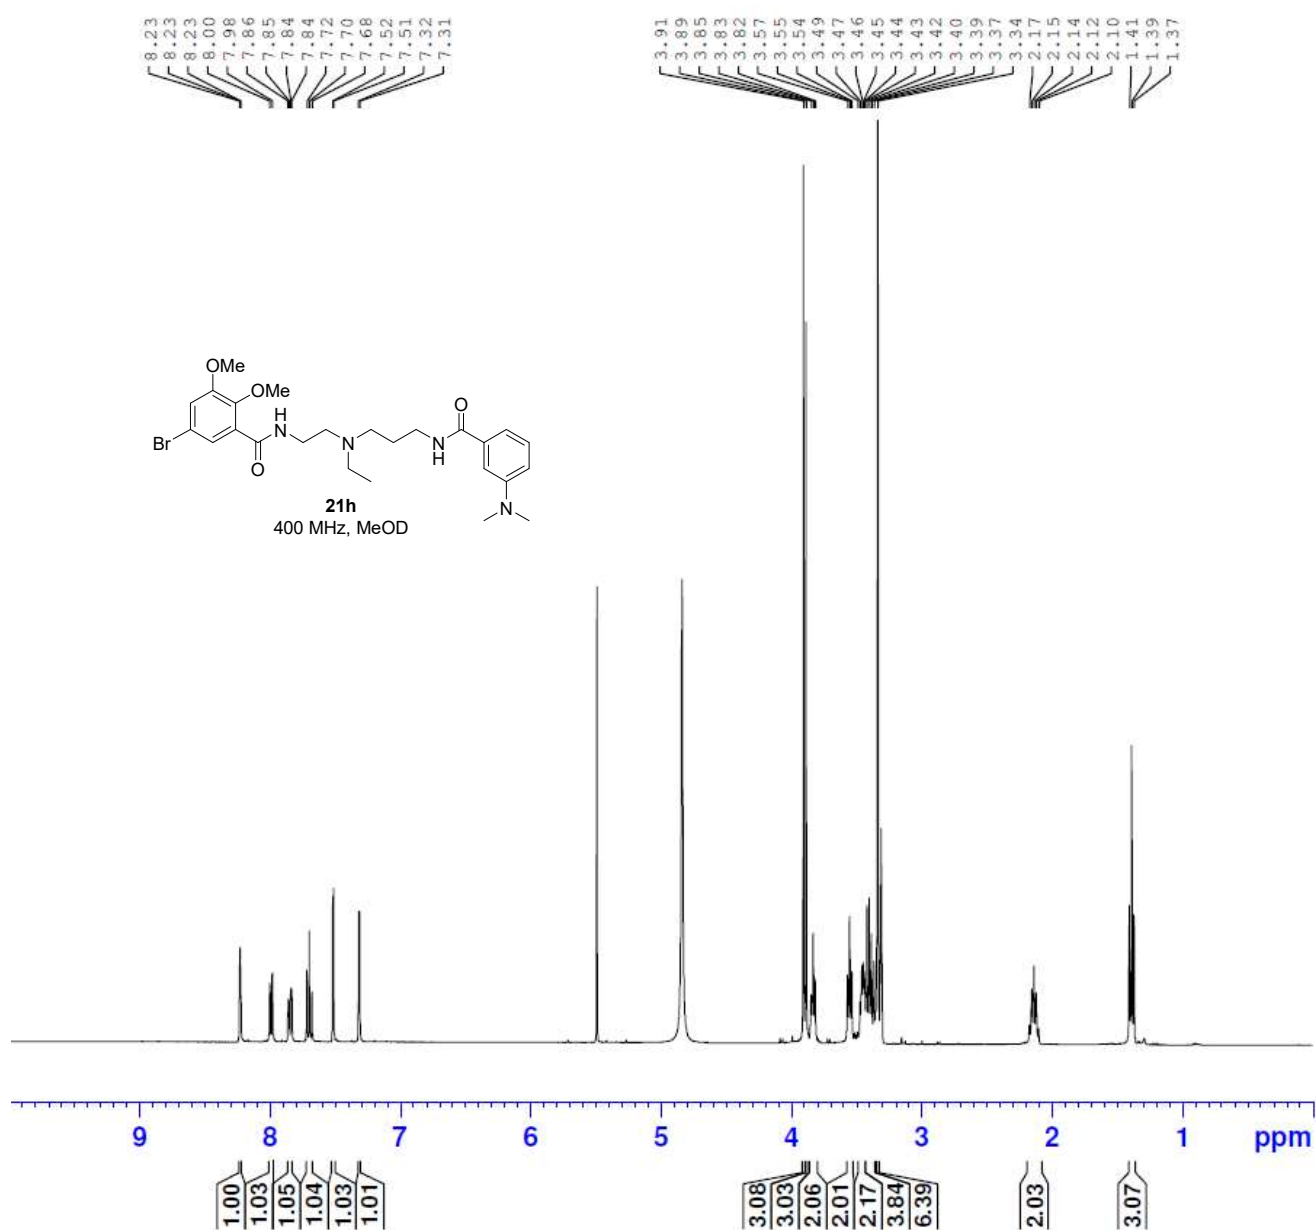

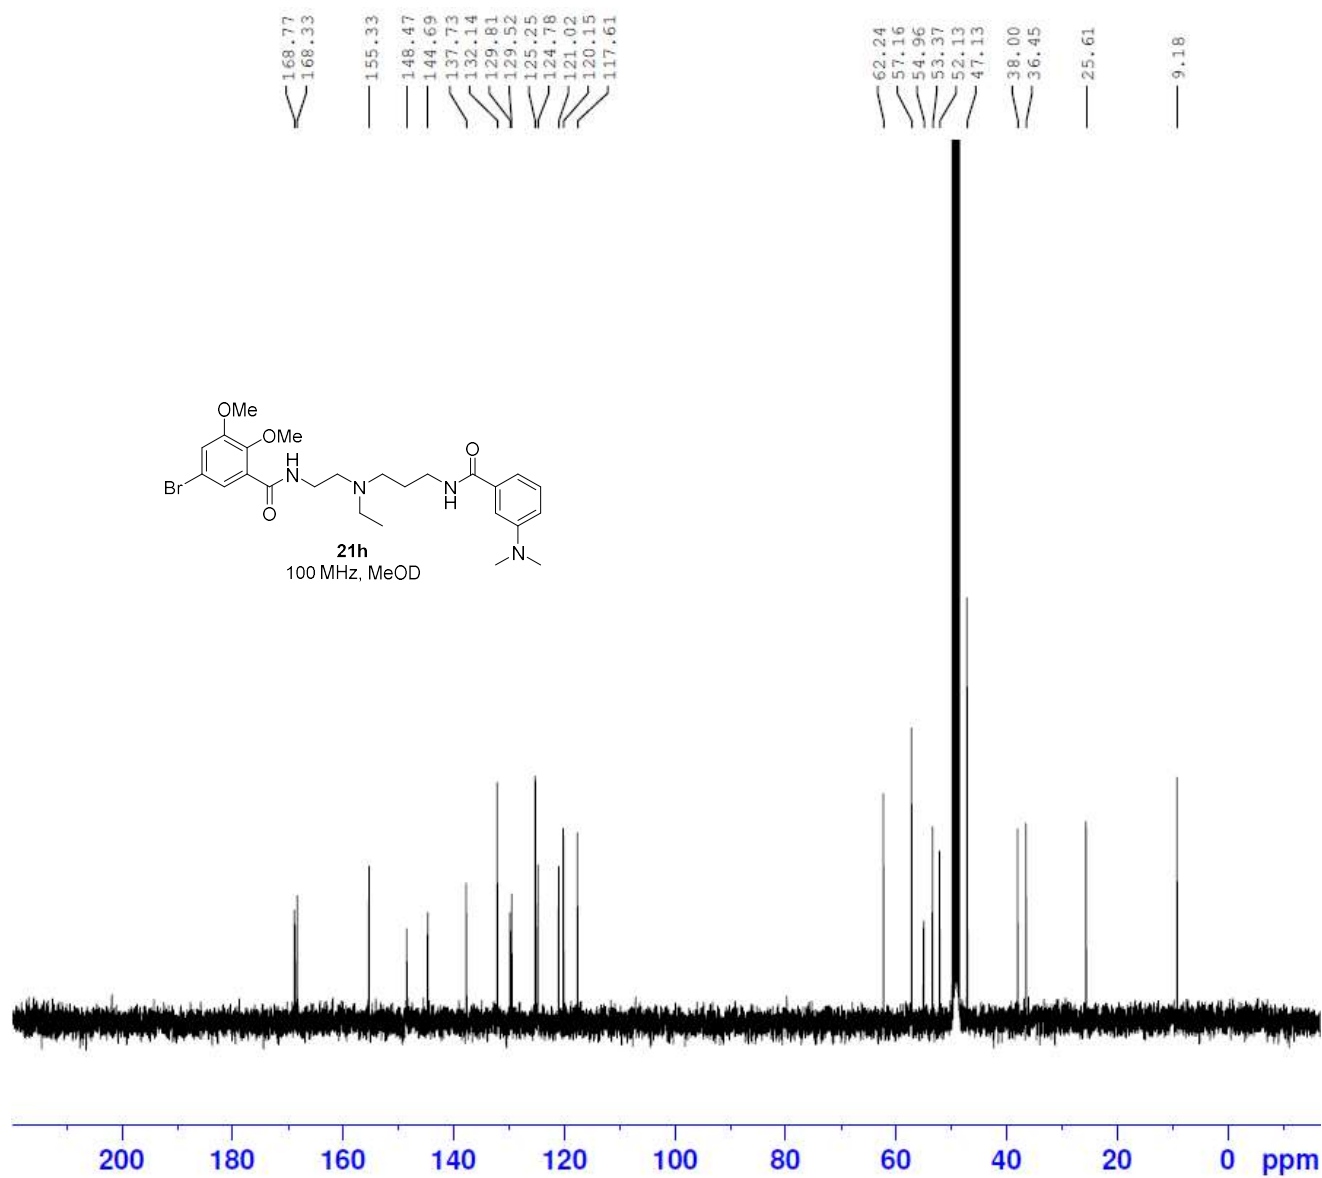

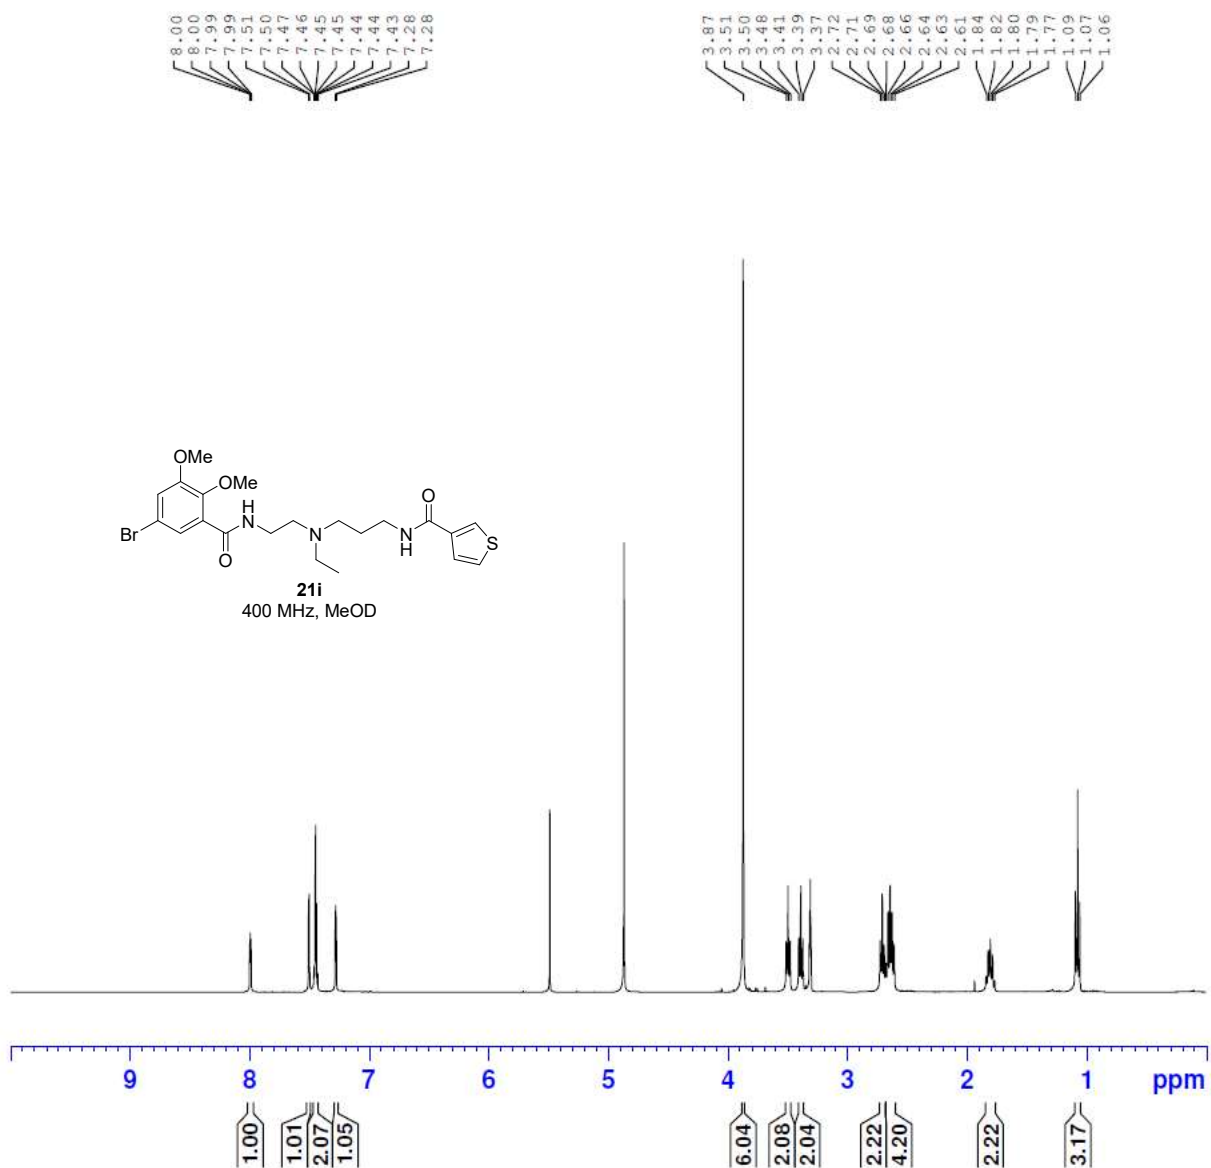

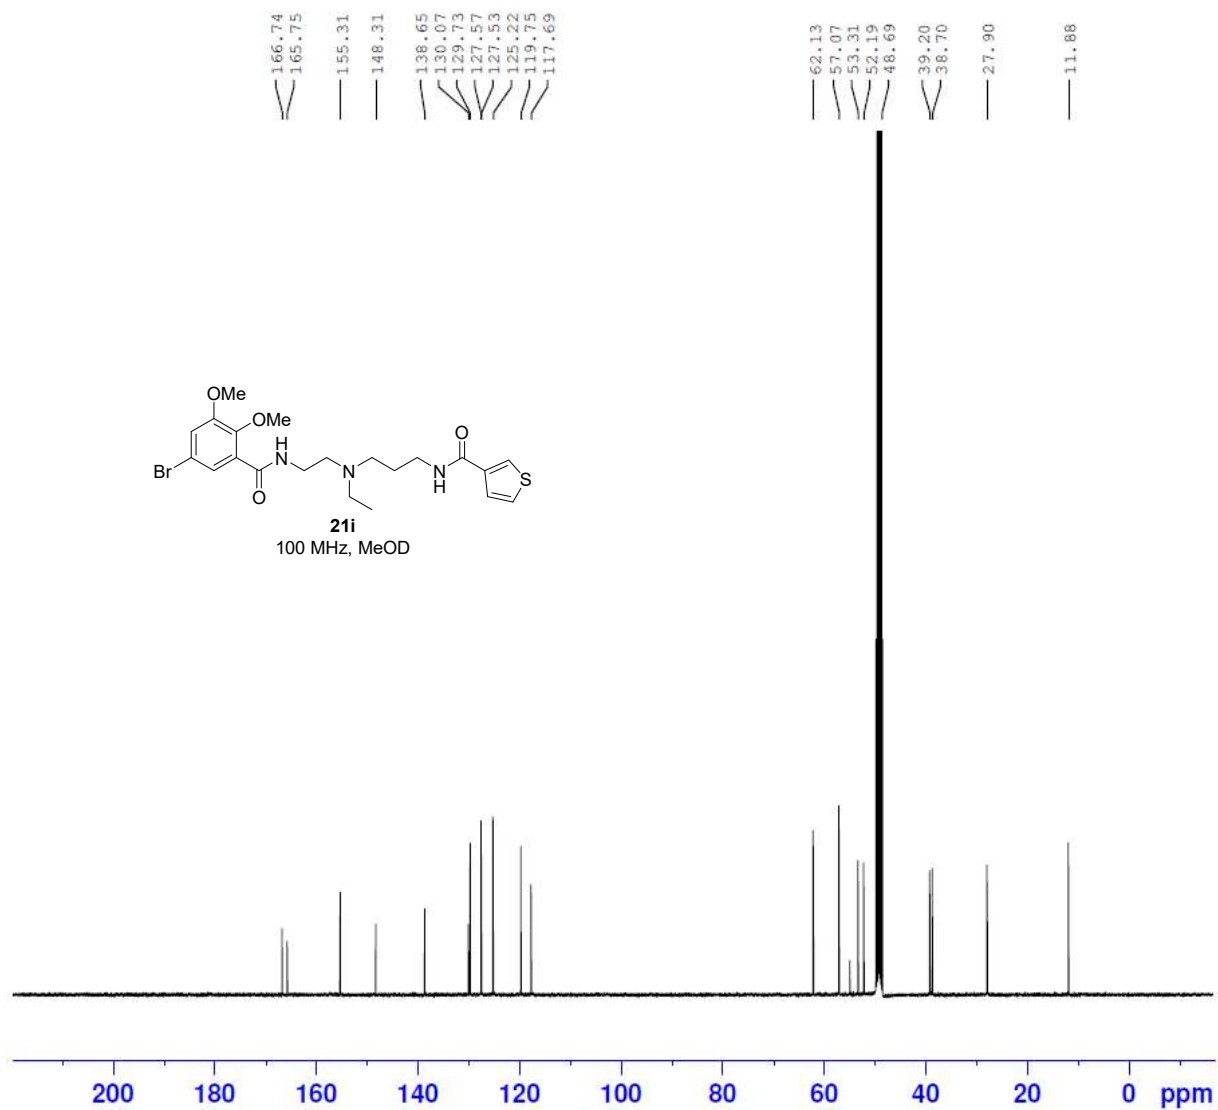

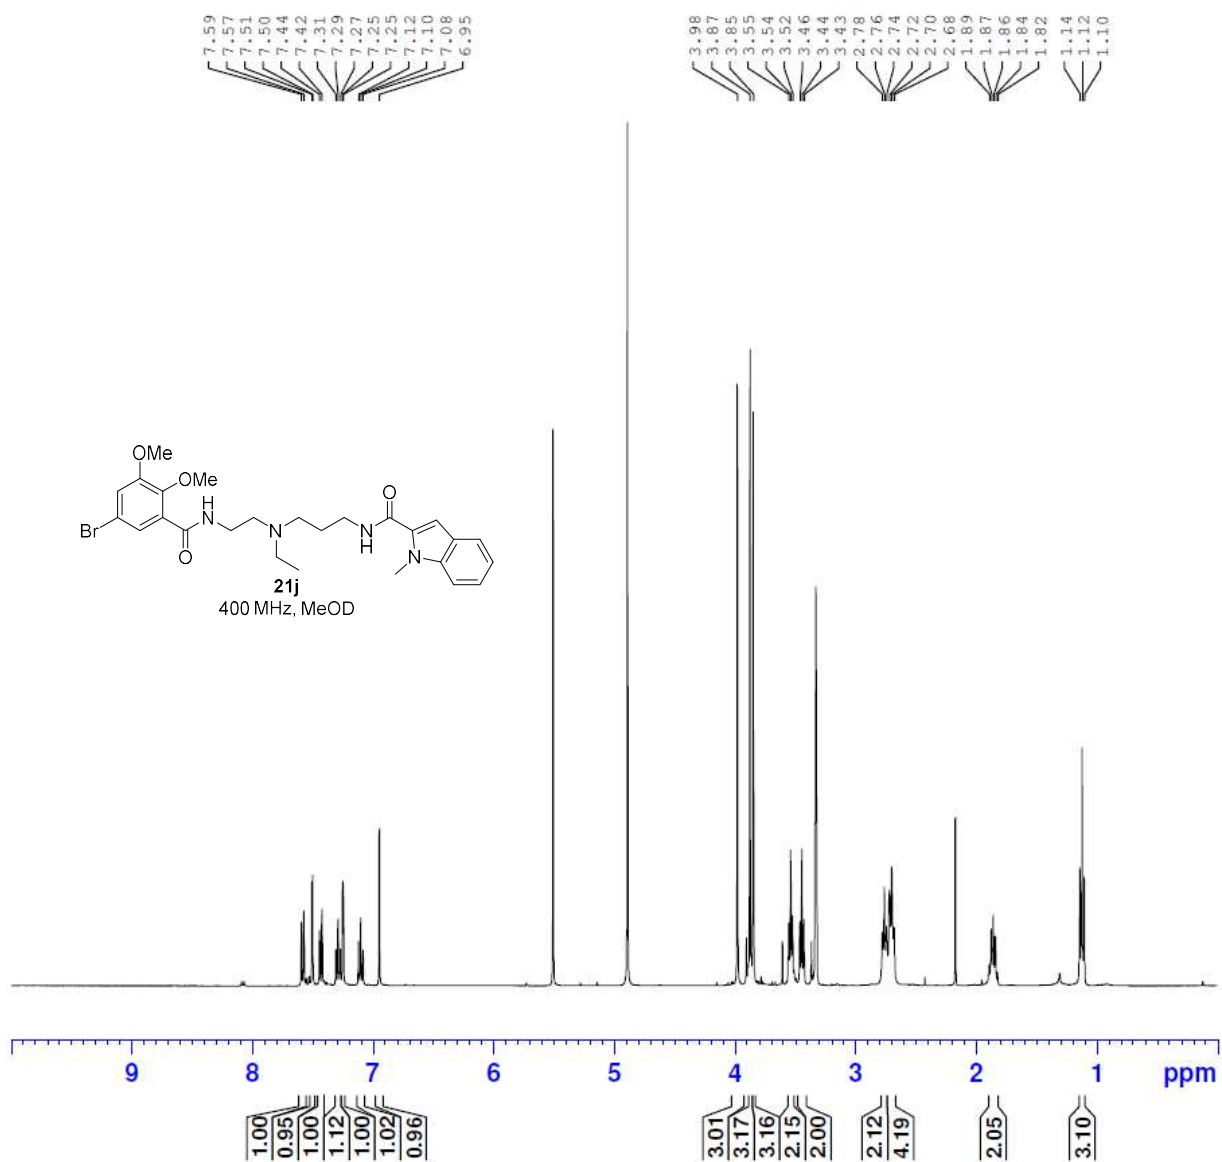

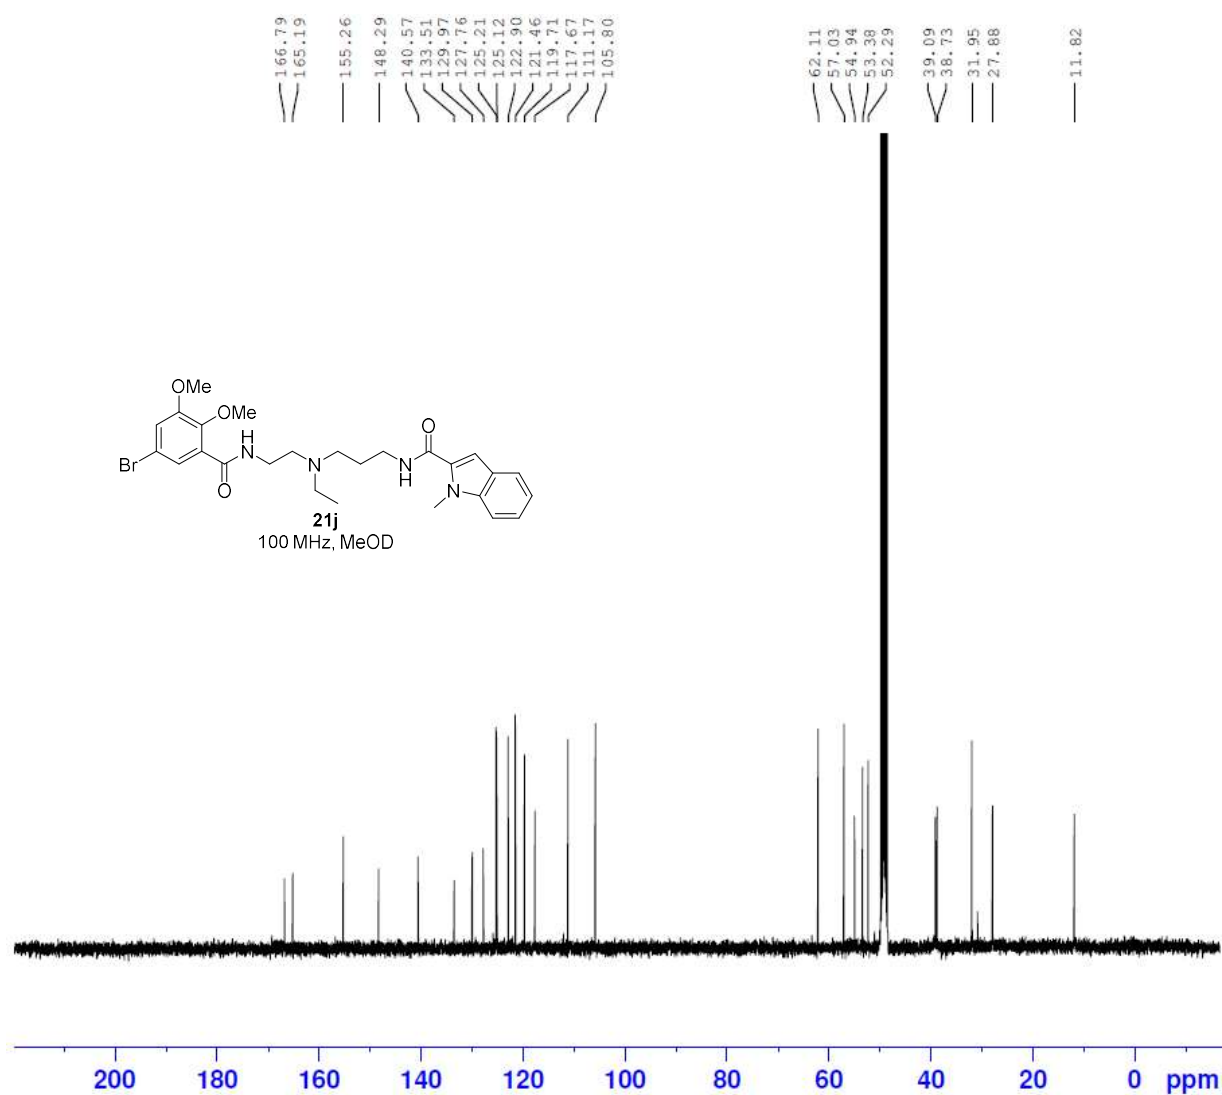

Supplement: s1 [file s1]
